# Supplementary material for: Diagnostic utility of DNA methylation analysis in genetically unsolved pediatric epilepsies and CHD2 episignature refinement
Source: PubMed Central journal article supplement (PMC11303402; doi:10.1038/s41467-024-50159-6), 2024-08-06
Supplement: 41467_2024_50159_MOESM1_ESM.pdf [file 41467_2024_50159_MOESM1_ESM.pdf]

1

**Supplementary Information**

2

3

**“Diagnostic Utility of Genome-wide DNA Methylation Analysis in Genetically Unsolved**

4

**Developmental and Epileptic Encephalopathies and Refinement of a CHD2 Episignature”**

5

**by LaFlamme et al.**

6

7 **Supplementary Phenotype data**

8

9 **Epivariants:**

10 **chr13 hypermethylation and X;13 translocation:** Individual T25808

11 Individual T25808 had hypermethylation along the chr13q and a corresponding translocation  
12 46,XX,t(X;13)(q28;q14.2). This girl died at 7 months with the epilepsy syndrome of Epilepsy of  
13 Infancy with Migrating Focal seizures. Her development slowed from 6 weeks of age with loss of  
14 head and trunk control and decreased interaction. Explosive onset of focal seizures occurred at  
15 at 5.5 months, resulting in a 7-week admission until she died. EEG showed multifocal and  
16 generalized epileptiform activity; seizure recordings showed ictal migration between  
17 hemispheres. MRI was normal at 6 months. T25808 did not have any reports of retinoblastoma.

18 The clinical spectrum of chromosome 13 copy number variation underscores its dosage  
19 sensitivity. For instance, individuals with Trisomy 13 typically have multiple congenital anomalies,  
20 including heart defects, microphthalmia, polydactyly, cleft lip/palate, hypotonia, and severe  
21 intellectual disability<sup>1</sup>. Many individuals born with Trisomy 13 die in the first year of life. Individuals  
22 with partial monosomy 13 have been reported to have multiple congenital anomalies, craniofacial  
23 differences, intellectual disability, and retinoblastoma. While partial monosomy 13 is more like  
24 Individual T25808, her chromosome 13 hypermethylation and any subsequent deactivation is  
25 dependent on X chromosome inactivation, and, therefore, would not be uniform throughout all  
26 cells. Interestingly, another individual with a balanced X;13 translocation of a similar region to our  
27 case [46,XX,t(X;13)(q28;q14.1)] had failure to thrive, developmental delay, and unilateral  
28 retinoblastoma, without seizures<sup>2</sup>.

29

30 **CSNK1E hypermethylation/repeat expansion:**

31 **Family 1:** Individual T1440

32 Individual T1440 had harbor hypermethylation of the 5'UTR and intron 1 of *CSNK1E* due to an  
33 underlying repeat expansion. T1440 is a male (with an unaffected dizygotic male twin). He  
34 presented with a brief <1 minute tonic-clonic seizure at 5 years. He had 5-15 second staring spells  
35 at 6 years that resolved with valproic acid. He had learning difficulties noted at 4 years, and  
36 developmental regression at 5 and 6 years with loss of understanding of his name or instructions,  
37 and his speech deteriorated to monosyllabic words. MRI showed a right frontal venous angioma  
38 and diffuse bilateral parietal parenchymal loss. EEG showed bilaterally synchronous slow spike-  
39 wave activity in about 50% of the sleep recording. Individual T1440's mother also has  
40 hypermethylation and repeat expansion in *CSNK1E*; she has no known epilepsy or  
41 neurodevelopmental symptoms.

42

43 **Family 2:** Individual 34167

44 Individual 34167 had hypermethylation of the 5'UTR and intron 1 of *CSNK1E* and is a female with  
45 moderate intellectual disability who had onset of epileptic spasms around 9 months. She had  
46 apparently normal development until seizure onset, at which time speech (babble) and motor  
47 milestones (sitting, rolling) were lost. Epileptic spasms occurred in clusters associated with sleep.  
48 They had flexor semiology, and initially responded well to ACTH. Recurrence of epileptic spasms  
49 and onset of tonic seizures occurred at 18 months. At the last evaluation (12 years old), seizure  
50 burden had been stable since the age of 3.5 years (4 clusters per month/1 per week). MRI was  
51 normal. EEG findings included generalized spike wave, poly spike and slow wave, multi-focal  
52 discharges, and abnormal background prior to initiation of ketogenic diet, which resulted in a  
53 reported 90% improvement of the EEG.

54

55 **Family 3:** Individual UDN821227

56 Individual UDN821227 was found to harbor hypermethylation of the 5'UTR and intron 1 of  
57 *CSNK1E* due to an underlying repeat expansion. UDN821227 is a male with seizure onset around

58 3-4 years leading to developmental regression. Epilepsy includes drug-resistant seizures (tonic-  
59 clonic, myoclonic, atonic, and absence) with continuous spike and slow waves during slow sleep  
60 on EEG. He is described as having mild intellectual disability, gastrostomy tube placement at 3-  
61 years-old, poor speech, failure to thrive, abnormality of the uvula, abnormal epiglottis morphology,  
62 asthma, sleep apnea, restless sleep, history of gastroesophageal reflux, and recurrent infections.  
63 He has a diagnosis of Lennox-Gastaut syndrome.

64 Individual UDN821227's mother, who also has hypermethylation and a repeat expansion  
65 in *CSNK1E*, has no seizure history but has neurodevelopmental, cognitive, and sleep findings.  
66 She has a history of learning difficulties, including dyslexia, requiring placement in a special needs  
67 classroom from 4<sup>th</sup> grade onward. She reports speech difficulties, including slurred words and  
68 finding the right words. She also reports significant difficulties with sleep, including falling asleep  
69 and nighttime wakefulness that impact quality of life and daily functioning. MRI brain is reported  
70 as normal.

71

72 ***DIP2B* hypermethylation/repeat expansion:** Individual 8245

73 Individual 8245 had hypermethylation of the promoter region and exon 1 of *DIP2B*. He is a male  
74 of normal intellect with short stature (Patient 8245<sup>3</sup>). He had Epilepsy with myoclonic-atonic  
75 seizures (EMATs), preceding febrile seizures, generalized tonic-clonic seizures (GTCS), atonic  
76 and absence seizures, with seizures settling at 13 years. Hypermethylation was also present in  
77 his unaffected mother.

78 Individuals with hypermethylation and CGG-repeat expansion in the *DIP2B* gene have  
79 widely variable features including, developmental delay, learning disabilities, seizures,  
80 craniofacial differences, and recurrent infections<sup>4</sup>. Of note, apparently healthy or unaffected  
81 individuals have also been found to have hypermethylation of this region with a population  
82 frequency of ~0.1%. Given the relatively high population frequency and inheritance,  
83 hypermethylation as a cause for this individual's phenotype is unclear.

84

85 ***BCLAF3* hypermethylation/repeat expansion:** Individual 33109

86 Individual 33109 was found to harbor hypermethylation in exon 1 of *BLCAF3* due to an underlying  
87 repeat expansion. Individual 33109 is a male with focal developmental and epileptic  
88 encephalopathy, moderate intellectual disability, and autism spectrum disorder. He had normal  
89 development until seizure onset with tonic-clonic seizures at 3 years when development slowed.  
90 He had developmental regression at 4 years. He had drug-resistant epilepsy, including convulsive  
91 status epilepticus (3 years 10 months), focal tonic seizures and focal clonic seizures (4 years 2  
92 months), atypical absence seizures (4 years), atonic seizures (5 years 8 months), and focal  
93 impaired awareness seizure (7 years). EEG showed a slow background with multifocal  
94 discharges.

95 In a previous sequencing analysis, an inherited *SCN1A* variant  
96 (NM\_001165963.4:c.4096G>A, NP\_001159435.1:p.Val1366Ile) was detected in 33109, his  
97 affected brother, and his unaffected mother. His 7-year-old brother had drug-responsive tonic-  
98 clonic seizures between 3 and 5 years of age with a normal EEG and MRI. He has normal  
99 cognition with autistic features. As the proband's mother is unaffected, the proband and his  
100 brother's phenotype are not consistent with *SCN1A*, and the variant is present in 5 individuals in  
101 gnomAD, it is thought that the *SCN1A* variant alone is not the cause of 33109's phenotype.

102

103 ***STX1B* hypermethylation/deletion:** Individual 7067 and family

104 This family with Genetic Epilepsy with Febrile Seizures plus (GEFS+) had 7 affected individuals,  
105 with 5 undergoing molecular testing; there were another 7 more distant individuals with an  
106 unconfirmed history of seizures (Pedigree in Figure Supplementary Figure 12A). The proband  
107 (7067) is a male with Epilepsy with Myoclonic-Atonic Seizures (EMAtS) that evolved to Lennox-  
108 Gastaut syndrome in the setting of moderate intellectual disability, autism spectrum disorder and  
109 obstructive sleep apnea. At 14 months, he presented with GTCS and myoclonic seizures.

110 Convulsive status epilepticus occurred once at 18 months. Myoclonic-atonic, absence and tonic  
111 seizures began at 2 years and non-convulsive status epilepticus at 12 years. Development was  
112 normal prior to seizure onset, when he became more withdrawn. Seizure exacerbation at 4 years  
113 was associated with regression in writing his name. At 7 years, his EEG showed generalized  
114 polyspike-wave activity associated with myoclonic seizures. At 38 years, video-EEG monitoring  
115 captured slow spike-wave increasing in sleep, generalized paroxysmal fast activity, frequent tonic  
116 seizures with prominent apnea, atonic and clonic seizures. Neuroimaging (MRI and CT-brain)  
117 was normal. Dysmorphic features included lumbar lordosis, clinodactyly, large flat feet with  
118 prominent toes, and a large capillary haemangioma over the lumbar spine.

119 His sister (7068) had EMAtS and mild intellectual disability. She had GTCS with fever at  
120 6 weeks. Later she had afebrile GTCS at 28 months, then developed myoclonic-atonic and  
121 absence seizures at 4 years. At 10 years, she developed focal impaired awareness seizures and  
122 non-convulsive status epilepticus. Development was always delayed and regression occurred at  
123 8 years old on carbamazepine. An EEG at 12 years showed background slowing and generalized  
124 epileptiform activity. CT-brain was normal. She had myasthenia gravis and underwent  
125 thymectomy at 14 years.

126 Their father (7066), who died at >60 years, had epilepsy following a motor vehicle accident  
127 at 30 years. He had a possible febrile seizure at 18 months and, at 32 years, three generalized  
128 tonic-clonic seizures in sleep. EEG showed right anterior quadrant slowing, without epileptiform  
129 activity. MRI showed right frontal focal atrophy following the contusion and a large cisterna  
130 magna.

131 Their mother (7065) had Febrile Seizures Plus (FS+) with 10 febrile seizures from 6  
132 months to 7 years of age, and afebrile GTCS from 11 years to 29 years. EEG showed left temporal  
133 slowing and CT brain was normal.

134 The maternal grandmother (7215) had temporal lobe epilepsy (TLE) with focal aware and  
135 focal to bilateral tonic-clonic seizures from 15.5 years. EEG showed left temporal slowing and  
136 MRI was normal.

137 The proband (7067), affected sister (7068), affected mother (7065), and affected maternal  
138 grandmother (7215) all exhibited outlier hypermethylation of the promoter and TSS of *STX1B*  
139 (Figure 3). This hypermethylation was found to be associated with an underlying heterozygous  
140 deletion encompassing the *STX1B* promoter, TSS, exon 1, and part of intron 1 [chr16:31,009,063-  
141 31,010,847x1 (GRCh38/hg38)], which segregated with the non-acquired epilepsy in the family.  
142 This family had three *CACNA1H* variants identified but no variant segregated perfectly through  
143 the family (Family A<sup>5</sup>, Family B<sup>6</sup>, Family A<sup>7</sup>).

144

145 *Episignatures:*

146 ***ANKRD11* (KBGS\_MRD23):** Individuals T23952 and 9714

147 Individual T23952 had a *de novo* pathogenic stop gain variant in *ANKRD11*  
148 (NM\_001256183.2:c.2512C>T, NP\_001243112.1:p.Arg838\*). T23952 had developmental  
149 regression at 5 months with loss of eye contact. At 7 months, eyelid myoclonias were observed,  
150 followed by epileptic spasms, with seizure offset at 9 months. Facial features were characteristic  
151 of *ANKRD11* facies, including a triangular face, bulbous nose, thin upper lip, featureless philtrum,  
152 broad bushy eyebrows, large prominent ears, and thin upper lip (Figure S16). She was of  
153 borderline intellect and had anxiety.

154 Individual 9714 had a *de novo* pathogenic stop gain variant in *ANKRD11*  
155 (NM\_001256183.2:c.6871G>T, NP\_001243112.1:p.Glu2291\*). She is a female who had  
156 neonatal onset of tonic-clonic seizures, which stopped at 18 years. Functional neurological  
157 seizures began at 27 years. She had developmental delay, and at 7 years she was of low average  
158 intellect.

159 Individuals with pathogenic *ANKRD11* variants (KBG syndrome) are reported to have  
160 unique facial dysmorphisms, skeletal anomalies, intellectual disabilities, behavioral issues,  
161 seizures, and brain malformations<sup>8</sup>.

162

163 ***SETD1B* (IDDSELD):** Individual 36369

164 Individual 36369 was found to harbor a pathogenic stop gain variant in *SETD1B*  
165 (NM\_001353345.2:c.4360C>T, NP\_001340274.1:p.Arg1454\*). 36369 is a male with absence  
166 with eyelid myoclonia seizure onset around 2 years old. At 10 years, he developed myoclonic  
167 seizures. Initially, he presented with hypotonia and developmental delay at 1 year of age. He has  
168 a moderate intellectual disability and is obese. EEG has shown generalized spike wave, polyspike  
169 and slow wave, and photosensitivity response (absence with eyelid myoclonia seizures triggered  
170 by eye closure). His father has temporal lobe epilepsy and was unavailable for genetic testing.

171 Individuals with *SETD1B*-related neurodevelopmental disorders are reported to have  
172 developmental delays (mainly affecting speech and language), intellectual disability, seizures  
173 (including absence with eyelid myoclonia seizures), autism spectrum disorder and autism-like  
174 behaviors, and additional behavioral concerns<sup>9</sup>.

175

176 ***TET3* (BEFAHRS):** Individual T22466

177 Individual T22466 was found to harbor a maternally inherited, likely pathogenic small indel in  
178 *TET3* (NM\_001287491.2:c.5243dup, NP\_001274420.1:p.Thr1749Hisfs\*5). T22466 is a female  
179 with Developmental and Epileptic Encephalopathy and Spike-Wave Activation in Sleep (DEE-  
180 SWAS) and mild intellectual disability. She had mild gross motor and language delay in the first  
181 year of life. At 3 years 4 months she developed occasional focal to bilateral tonic-clonic seizures  
182 and focal impaired awareness seizures and her development progressed slowly. At 6 years she  
183 developed stuttering and language regression associated with frequent independent high



184 amplitude bi right and left temporal parietal discharges while awake (sleep not captured). She has  
185 macrocephaly (>98<sup>th</sup> centile), and MRI is normal. Her mother also has the *TET3* variant, a large  
186 head size (>90<sup>th</sup> centile), and learning difficulties; her maternal grandmother had epilepsy in  
187 childhood.

188 Individuals with *TET3*-related disorders have been reported to have variable phenotypes  
189 including global developmental delay, intellectual disability, dysmorphisms, and multiple  
190 congenital anomalies<sup>10</sup>.

191

192 ***UBE2A (MRXSN)***: Individual 26720

193 Individual 26720 had a maternally inherited, likely pathogenic variant in *UBE2A*  
194 (NM\_032590.5:c.376G>A, NP\_115979.3:p.Ala126Thr). This adolescent had onset of GTCS at 28  
195 months. At 6 years, he developed focal seizures and focal to bilateral tonic-clonic seizures. He  
196 had developmental delay without regression, and now has mild intellectual disability and ADHD.  
197 He had dysarthria and dysmorphic features including a short, upturned nose with a flattened nasal  
198 bridge, short well-defined philtrum with a tented upper everted lip, high arched eyebrows, full  
199 cheeks, two anterior left-sided ear tags, short digits, short broad feet and hypoplastic nails. EEG  
200 showed bilateral independent centrotemporal discharges. MRI at 2 years showed sub-cortical  
201 white matter signal change.

202 Individuals with *UBE2A*-related X-linked intellectual disability have been reported to have  
203 facial dysmorphisms, hirsutism, hypoplastic genitalia, short stature, hypotonia, seizures, severe  
204 intellectual disability<sup>11</sup>.

205

206 ***SMS (MRXSSR)***: individual 31067

207 Individual 31067 had a maternally inherited, likely pathogenic variant in SMS  
208 (NM\_004595.5:c.328C>G, NP\_004586.2:p.Arg110Gly). 31067 is a male with Developmental and  
209 Epileptic Encephalopathy and moderate intellectual disability. Absence seizures were diagnosed  
210 at 17 months but may have been occurring as early as 6 months. Other seizure types include  
211 frequent myoclonic seizures and rare generalized tonic-clonic seizures. EEG showed generalized  
212 spike-wave and polyspike-wave activity with background slowing. His development was delayed  
213 at 6 months and regression occurred at age 2.5 years. He had speech dyspraxia with nasal  
214 speech, hypotonic cerebral palsy, and an ataxic gait. Dysmorphic features included friable hair,  
215 moderately high arched palate, thin upper lip, fine eyebrows, low anterior hairline and long, thin  
216 fingers and toes. He has osteoporosis with a history of fractures. MRI brain was normal.

217 Individuals with SMS-related X-linked intellectual disability disorders (Snyder-Robinson  
218 Syndrome/Spermine Synthase Deficiency) have been reported to have hypotonia, developmental  
219 delays and moderate to and severe intellectual disability, speech abnormalities (nasal, dysarthric,  
220 coarse, or absent), facial dysmorphisms (prominent lower lip; high, narrow, or cleft palate),  
221 asthenic (long and narrow) build, osteoporosis leading to fractures, kyphoscoliosis, short stature,  
222 variable motor disability and gait abnormalities, and seizures<sup>12</sup>.

223

224 ***KDM2B (KDM2B)***: Individual 33769

225 Individual 33769 was found to harbor a paternally inherited variant in *KDM2B*  
226 (NM\_032590.5:c.1046G>C, NP\_115979.3:p.Arg349Pro). Individual 33769 displays  
227 macrocephaly and focal epilepsy, consistent with their diagnosis of *PTEN*  
228 (NM\_000314.8:c.253+5G>A, *de novo*). The individual's father (33770) is unaffected, and,  
229 therefore, the paternally inherited *KDM2B* variant is unlikely to contribute to the individual's  
230 phenotype.

231

232 **Episignature Negative with *CHD2* VUS:** Individual ILGC\_1081

233 Individual ILGC\_1081 had normal development until 10 years of age. Seizure onset was at 6  
234 years of age with focal semiology from the left temporal lobe. She was found to harbor a VUS in  
235 *CHD2* (NM\_001271.4:c.5002C>T, NP\_001262.3:p.His1668Tyr) that was not maternally inherited,  
236 but her father was unavailable for testing. Because ILGC\_1081 was found to be negative for the  
237 *CHD2* episignature in conjunction with a lack of clinical evidence for *CHD2*-encephalopathy (i.e.  
238 absence of myoclonic or photosensitive seizures), the *CHD2* variant was determined to be likely  
239 benign. A maternally inherited pathogenic *CACNA1A* variant  
240 (NM\_001127221.1:c.5559\_5560delCA, NP\_001120693.1:p.Tyr1853\*) was also found. Her  
241 maternal side of the family has other affected members (half-sibling with febrile seizures, maternal  
242 aunt, and maternal grandmother with epilepsy, not genetically tested). Finally, her MRI was  
243 remarkable for mild vermian hypoplasia, which can be seen in calcium channel diagnoses. Thus,  
244 the pathogenic variant in *CACNA1A* was determined to be more consistent with her clinical  
245 phenotype. Her seizures have been intractable to multiple medications and placement of a  
246 responsive neurostimulation device.

247 **Supplementary Methods**

248

249 **Cohort Subjects and Controls**

250 Unaffected, presumably healthy controls without DEEs include 111 healthy controls obtained  
251 through the Parkinson's Progression Markers Initiative (PPMI)<sup>13</sup>, institutionally available data for  
252 335 community control individuals without cancer from the St. Jude Life (SJLIFE) study<sup>14</sup>, and 29  
253 unaffected parents or siblings of participants in our study cohort (Supplementary Data 1).  
254 Analytical controls include six individuals with known rare DMRs for validation of the  
255 computational outlier approach. These include two probands with Baratela-Scott syndrome (BSS)  
256 harboring *XYLT1* heterozygous hypermethylation on one allele and pathogenic variants on the  
257 other allele, one heterozygous *XYLT1* hypermethylation carrier mother of child with BSS, and  
258 three individuals with Fragile X syndrome harboring *FMR1* hypermethylation (two males, one  
259 female) obtained from the Coriell Institute for Medical Research (Table S1). Further analytical  
260 controls include 26 individuals with DEEs caused by pathogenic variants in genes with known  
261 epesignatures to validate the epesignature screening, including n=17 *CHD2*, n=1 *CHD2* VUS, n=1  
262 *KDM5C*, n=1 *SETD1B*, n=1 *KMT2A*, n=1 *SMARCA2*, n=2 *SMC1A*, and n=2 CNVs (Table S4).  
263 Finally, we included 116 analytical controls comprised of individuals with DEEs who had  
264 previously identified pathogenic variants in genes without known epesignatures. These 116  
265 individuals better age match our unsolved DEE cohort and were used as further controls for  
266 comparison of rare DMRs and epesignatures.

267 A short application for access to the PPMI dataset is required. This may be found by  
268 navigating to <https://www.ppmi-info.org/> and choosing to “apply for data access.” Once granted,  
269 details about the sample collection and methylation array data acquisition are given as “genetic  
270 data” under “methylation profiling” in a PDF called <Project 140: Comprehensive Methylation  
271 Profiling Methods.pdf>. Sample distribution and other qualitative metadata for the cohort may be  
272 found in “study data” under “subject characteristics.”

273

## 274 **Reproducibility of DNA Methylation Array Replicates for Outlier Analysis**

275 For individuals with replicate array data (n=29 individuals, n=61 total samples), we checked for  
276 the reproducibility of autosomal DMRs across different batches for the same individual. Of the 29  
277 individuals, 17 of the individuals had perfect concordance across replicates for the DMRs that  
278 were called by the algorithm; six individuals had DMRs called for one replicate that could be  
279 confirmed through manual inspection. The remaining 6 individuals had at least 1 DMR that was  
280 not reproducible across replicates. Of the total number of DMRs for the 61 replicate samples,  
281 80% were reproduced across the replicates.

282

## 283 **Targeted Enzymatic Methyl-Sequencing Library Preparation, Target Enrichment, and** 284 **Sequencing**

285 This approach uses two sets of enzymatic reactions to convert unmodified cytosines to uracil,  
286 allowing for the detection of methylated vs.unmethylated cytosines without the need for bisulfite  
287 conversion<sup>15</sup>.

288         Approximately 200-300ng of peripheral blood-derived genomic DNA input for 9 samples  
289 (three positive controls (*XYLT1* and *FMR1* hypermethylation) and three DEE probands with  
290 DMRs-of-interest) were diluted to 52 $\mu$ L with 0.1X TE pH 8.0 in a 96 microTUBE-50 AFA fiber plate  
291 (PN 520168) and fragmented on the Covaris LE 220 with SonoLab 7.3 software (Covaris Inc.). A  
292 120-second program with peak incident power (W) of 453.0, duty factor (%) of 15.2, and cycles  
293 per burst (cpb) of 1000 resulted in an average fragment size of 285 bp. Then, 50 $\mu$ L of each sample  
294 was transferred to a fresh plate to begin library construction. End repair, A-tailing, and the ligation  
295 of                 the                 0.4 $\mu$ M                 EM-Seq                 adaptor  
296 (A5mCA5mCT5mCTTT5mC5mC%*m*C<sub>T</sub>A5mCA5mCGA5mCG5mCT5mCTT5mC5mCGAT5mC\*  
297 T and [Phos]GAT5mCGGAAGAG5mCA5mCA5mCGT5mCTGAA5mCT5mC5mCAGT5mCA)  
298 were performed with NEBNext DNA Ultra II reagents according to the manufacturer's instructions

299 (PN 101977). Products were then purified by 1.18x bead clean up, using Twist Total Purification  
300 Beads (PN 101979) and eluted in 30 $\mu$ L water. About 28 $\mu$ L of each eluate was used as input for  
301 the 50 $\mu$ L oxidation reaction by TET2, proteinase K stop digestion, 1.8x bead clean-up, formamide  
302 denaturation, APOBEC deamination, and 1.0x bead purification described previously<sup>15</sup>. Then,  
303 20 $\mu$ L of each deaminated library was used as input in an amplification reaction with 25 $\mu$ L of  
304 NEBNext Q5U Master Mix (#M0597) and 1 $\mu$ M (5 $\mu$ L) of primer from NEBs 96 Unique Dual Index  
305 Primer Pairs Plate (#E7166A) as follows: 30 sec at 98 $^{\circ}$ C; cycling 10 times, 10 sec at 98 $^{\circ}$ C, 30  
306 sec at 62 $^{\circ}$ C, and 60 sec at 65 $^{\circ}$ C; with a final extension for 5 minutes and hold at 4 $^{\circ}$ C.

307 A 0.9x bead purification was performed on each amplified library, and 20 $\mu$ L of each eluate  
308 was used as input for target enrichment with the Twist Biosciences Fixed Human Methylome  
309 Panel. The 8-plex hybridization captures were created with 200ng of each sample combined to  
310 create a 1.6 $\mu$ g pool. Then, 4 $\mu$ L of Twist's Fixed Methylome Panel (PN 105521), 8 $\mu$ L of Universal  
311 Blockers, 5 $\mu$ L of Blocker Solution (#100767), and 2 $\mu$ L of Methylation Enhancer (#103558) were  
312 added to each pool and then dried down using an Eppendorf Vacufuge Plus with V-AQ setting @  
313 45 $^{\circ}$ C for approximately 1 hour to create a pre-hybridization solution. Twist's Fast Hybridization  
314 mix (PN 104182) was heated at 65 $^{\circ}$ C for at least 10 minutes until all precipitates dissolved, and  
315 20 $\mu$ L was added directly to each of the dried pools without allowing the reagent to cool. Then,  
316 30 $\mu$ L of Hybridization Enhancer was added to the top of each pool, and these pools were  
317 transferred to a thermal cycler set to a 95 $^{\circ}$ C hold. Once the lid was sealed, a 95 $^{\circ}$ C hold for 5  
318 minutes was initiated, and samples were subsequently held overnight at 60 $^{\circ}$ C for a minimum of  
319 16 hours. Then, 100 $\mu$ L of Streptavidin Binding Beads (#100984) were washed with 200 $\mu$ L RT  
320 Fast Binding Buffer, placed on a magnet for 1 minute, supernatant removed, for a total of 3  
321 washes, a final 200 $\mu$ L FBB was added, and the beads were resuspended by vortexing. Each  
322 hybridization pool (8-plex) was added directly from the 60 $^{\circ}$ C thermocycler to a tube of washed,  
323 resuspended Streptavidin Binding Beads and mixed at RT on a rotisserie axel for 30 minutes.  
324 Pools were then pulse spun and placed on a magnet for 1 minute. The supernatants were

325 removed and discarded. Tubes were removed from their magnets, and 200µL of preheated (62°C)  
326 Fast Wash Buffer 1 was added to each pool and pipette mixed. Pools were then incubated at  
327 62°C for 5 minutes, pelleted on magnets for 1 minute, and the supernatant removed and  
328 discarded. Then, 200µL FWB1 addition and incubation were repeated, tubes were spun down,  
329 and bead-sample mixtures were transferred to fresh 1.5mL tubes before placing them on  
330 magnets. The remainder of the washes and final elution of enriched 8-plex libraries were  
331 performed according to the manufacturer's instructions (Twist Biosciences). Then, 30µL of each  
332 final enriched library was transferred to a clean tube for Illumina short-read sequencing.

333 All inputs and libraries were evaluated and quantified using D1000HS tape for TapeStation  
334 (Agilent) and Qubit™ 1X dsDNA HS (Invitrogen) assay kits. The average final library size was  
335 370 bp. Sequencing was performed on the NovaSeq 6000 platform in paired-end mode with 150  
336 bp per read. Paired-end reads (151 bp) for EM-Seq were collected from NovaSeq 6000 runs and  
337 then analyzed using bcl2fastq. The hg38\_noAltHla\_UCSC.fa reference file supplied through FTP  
338 by Twist Biosciences was used to create a reference genome in FASTA format. Samtools<sup>16</sup> and  
339 picard were used to create an index and ref sequence dictionary. The raw FASTQ data underwent  
340 quality control, processing and downstream analysis using the nf-core/methyseq bioinformatics  
341 pipeline. To extract the methylation calls using MethylDackel<sup>17</sup>, we invoked the '--aligner  
342 bwameth' flag in the nf-core/methyseq pipeline. EM-Seq samples were trimmed using Trim  
343 Galore! (Krueger, Felix, 2015, v. 0.6.6) and cutadapt, and subsequently aligned using bwameth  
344 (default parameters), sambamba, and samtools. Duplicate reads were marked (picard) with an  
345 optical pixel distance of 2500 for a patterned S4 flow cell (Illumina). The  
346 covered\_targets\_Twist\_Methylome\_hg38\_annotated\_collapsed.bed file with TARGET and  
347 BAITs was converted to an interval list, and performance metrics were generated (fold-80 base  
348 penalty, HS library size, % duplicates, % off bait). MethylDackel was used to generate a  
349 methylation bias plot, likely variant sites were excluded (--maxVariantFrac 0.25), minimum depth  
350 of 10X (--minDepth 10) was set, and CpG calls were generated. Additional filters were added to

351 generate global methylation cytosine reports, including CHH and CHG sites. Mapping efficiency,  
352 mapped reads (samtools), and the global average CpG % methylation and non-CpG conversion  
353 ratio (%) for each sample were generated from the cytosine report (methyldackel).

354

### 355 **Exome and Genome Sequencing**

356 Variants for individual samples were called from ES and GS following the GATK best practices  
357 workflow (including VQSR)<sup>18</sup>. Minimum genotype quality ( $\geq 20$ ), minimum coverage depth ( $\geq 7$ ),  
358 and minimum variant allele frequency ( $\geq 20\%$ ) thresholds were applied with Bcftools<sup>16</sup>. Variants  
359 were annotated with population frequency data (gnomAD<sup>19</sup>, ExAC<sup>20</sup>, ESP6500<sup>21</sup>, and 1000  
360 Genomes<sup>22</sup>), in silico scores (dbNSFP<sup>23</sup>), and potential clinical relevance (ClinVar<sup>24</sup> and  
361 InterVar<sup>25</sup>) via ANNOVAR<sup>24</sup> and InterVar<sup>25</sup>) via ANNOVAR<sup>26</sup>. Additional in silico scores  
362 (LOFTEE<sup>27</sup>, CADD<sup>28</sup>, and SpliceAI<sup>27</sup>) were applied using VEP<sup>28</sup>.

363

### 364 **RNA-Sequencing and Gene Expression Analysis**

365 RNA was extracted from flash-frozen cell pellets obtained from cultured fibroblasts using the  
366 Quick-RNA Miniprep Kit (Zymo Research). RNA was quantified using the Quant-iT RiboGreen  
367 RNA assay (ThermoFisher), and quality was checked by the 2100 Bioanalyzer RNA 6000 Nano  
368 assay (Agilent) or 4200 TapeStation High Sensitivity RNA ScreenTape assay (Agilent) before  
369 library generation. Libraries were prepared from total RNA with the TruSeq Stranded mRNA  
370 Library Prep Kit according to the manufacturer's instructions (Illumina PN 20020595). Libraries  
371 were analyzed for insert size distribution using the 2100 BioAnalyzer High Sensitivity kit (Agilent),  
372 4200 TapeStation D1000 ScreenTape assay (Agilent), or 5300 Fragment Analyzer NGS fragment  
373 kit (Agilent). Libraries were quantified using the Quant-iT PicoGreen ds DNA assay  
374 (ThermoFisher) or by low-pass sequencing with a MiSeq nano kit (Illumina). Paired-end 100-cycle  
375 sequencing was performed on a NovaSeq 6000 (Illumina). The raw FASTQ data underwent  
376 processing and analysis utilizing the nf-core/rnaseq bioinformatics pipeline<sup>29</sup>.



377

### 378 **Whole-Genome Bisulfite Sequencing**

379 The EZ-96 DNA Methylation-Gold MagPrep (Zymo Research) was used for bisulfite conversion.  
380 Libraries were prepared from converted DNA using the xGen Methylation-Sequencing DNA  
381 Library Preparation Kit (Integrated DNA Technologies). Libraries were analyzed for insert size  
382 distribution using the 2100 BioAnalyzer High Sensitivity kit (Agilent), 4200 TapeStation D1000  
383 ScreenTape assay (Agilent), or 5300 Fragment Analyzer NGS fragment kit (Agilent). Libraries  
384 were quantified using the Quant-iT PicoGreen ds DNA assay (ThermoFisher) or by low-pass  
385 sequencing with a MiSeq nano kit (Illumina). Paired-end 150-cycle sequencing was performed  
386 on a NovaSeq 6000 (Illumina).

387

### 388 **Functional Annotation and Enrichment Analysis of CHD2 Episignature Probes and DMRs**

389 An in-house Perl script  
390 ([https://github.com/MeffordLab/2024\\_GenomeWideMethylationPaper/blob/main/generate\\_rando](https://github.com/MeffordLab/2024_GenomeWideMethylationPaper/blob/main/generate_random_genomic_ranges.pl)  
391 [m\\_genomic\\_ranges.pl](https://github.com/MeffordLab/2024_GenomeWideMethylationPaper/blob/main/generate_random_genomic_ranges.pl)) was used to systematically generate random genomic ranges (simulated  
392 genomic regions) for comparison in the enrichment analysis simulating background. The script,  
393 featuring a function named `generate_genomic_ranges`, allows for user-defined parameters such  
394 as the number of genomic ranges, minimum and maximum lengths, and a specified set of  
395 chromosomes. Chromosome information was extracted from a locally stored file containing the  
396 lengths of each chromosome. The script then randomly assigned start and end positions within  
397 the specified length constraints for each genomic range, associating them with randomly selected  
398 chromosomes. Subsequently, the resulting genomic ranges were sorted based on chromosome  
399 names and start positions. Finally, the sorted genomic ranges were exported to a BED file in tab-  
400 delimited format, facilitating downstream annotation for comprehensive analysis. To ensure  
401 robustness, we generated three distinct sets of simulated genomic regions (Replicate-1,

402 Replicate-2, and Replicate-3, Table S9), each comprising the same total number of regions as  
403 CHD2-Probes/DMRs (n=4767, Table S8) and of varying, comparable length (50bp-3,100bp),  
404 enabling meaningful comparisons in subsequent analyses.

405 For annotation purposes, we utilized the GREEN-DB<sup>30</sup> collection, encompassing various  
406 regulatory elements (bivalent regions, enhancers, and promoters sourced from ENCODE,  
407 FANTOM5, DiseaseEnhancers, BENGI, DECRES, etc.), transcription factor binding site (TFBS  
408 from UCSC genome browser tracks), and DNase peaks (from UCSC genome browser tracks).  
409 Direct links to these databases are now provided in  
410 [https://github.com/MeffordLab/2024\\_GenomeWideMethylationPaper/blob/main/selected\\_Green](https://github.com/MeffordLab/2024_GenomeWideMethylationPaper/blob/main/selected_Green)  
411 `VarDB_links.sh`. These annotations were applied to both the CHD2 Episignature Probes with  
412 Array and WGBS DMRs (Table S8) and the simulated replicate genomic regions (Table S9) using  
413 bedtools '-intersect' option with at least 90% overlap.

414 To assess the enrichment of features (Various regulatory elements, TFBS, and DNase  
415 sites) in the CHD2-Probes/DMRs, we computed the enrichment ratio (Table S10) with respect to  
416 the simulated genomic regions. This ratio was defined as the proportion of features in real  
417 regions divided by the total number of real regions, normalized by the proportion of features in  
418 simulated regions divided by the total number of simulated regions. Importantly, this method  
419 accounts for comparability in size and other relevant characteristics of genomic regions in both  
420 datasets. To validate the observed enrichment, two-sided Fisher's Exact tests (Table S10) were  
421 performed using the R statistical environment, ensuring the statistical robustness of the  
422 comparative analyses.

423

**A** Before Batch Correction

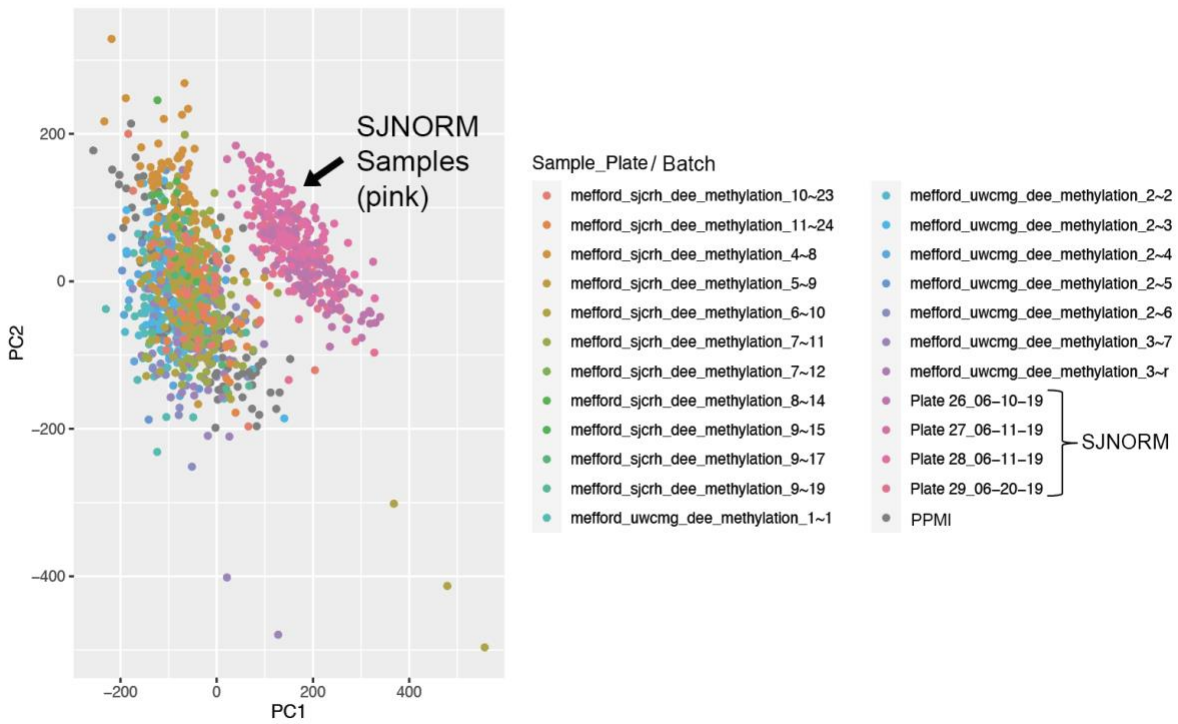

**B** After Batch Correction

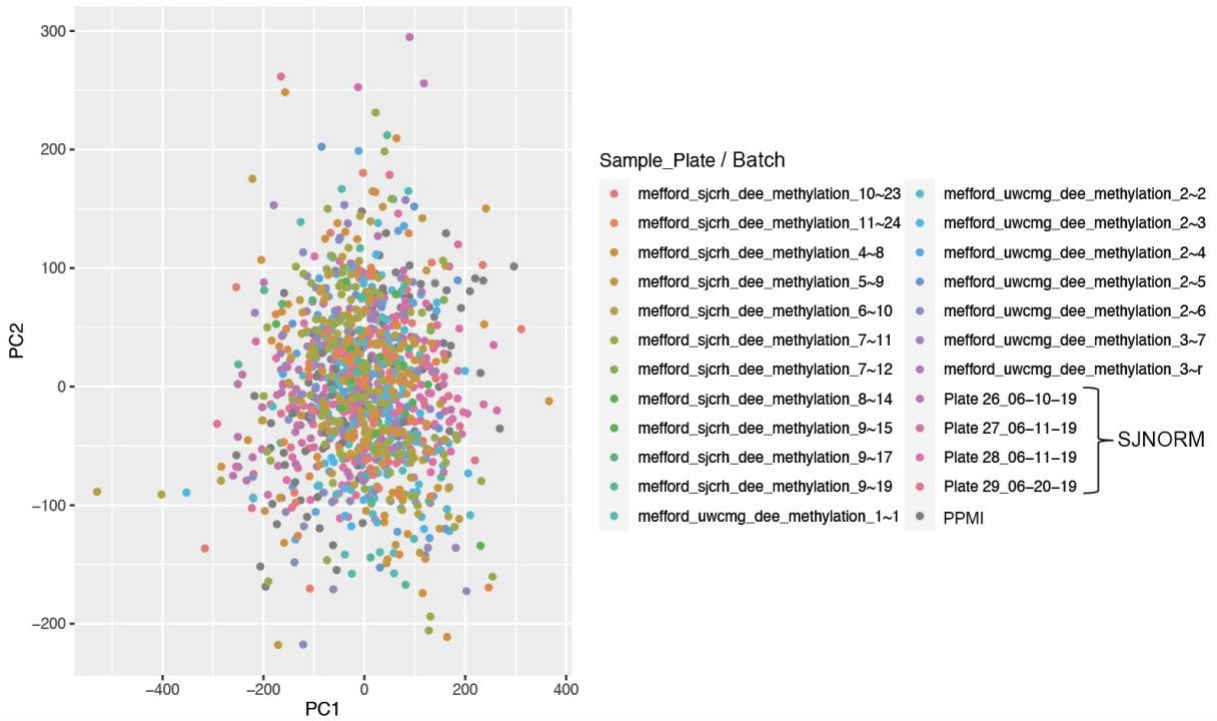

426 **Supplementary Figure 1.** Correction of DNA methylation array batch effects detected through  
427 PCA analysis. **A.** principal component analysis (PCA) plot using  $\beta$  values for probes located on  
428 chromosome (chr) 1 for all samples (n=1238 methylation array samples) after filtering out n=21  
429 PCA outlier samples. Sample plate/batch (also listed in Supplementary Data 1B and 1C) labeled  
430 as “mefford” denote methylation arrays were performed at the UW or SJCRH for individuals with  
431 DEEs and controls as described. SJNORM plates indicate methylation arrays run for presumably  
432 healthy controls at SJCRH as a part of the SJLIFE study. A clear batch effect on PC1 is evident  
433 between the SJNORM samples and the rest of the samples included in this study. Although  
434 controls used from the PPMI study were run at a different institution, there is no batch effect with  
435 the PPMI cohort and our other samples. **B.** PCA plot after performing ComBat analysis, as  
436 detailed in the methods, where it is evident that the batch effect is eliminated. As a validation,  
437 DMR outlier analysis was performed (1) with batch correction of SJNORM as displayed and (2)  
438 with batch correction accounting for every batch as shown in the figure legend. Method (1) was  
439 chosen as the best approach, since method (2) resulted in the overcorrection and the loss of a  
440 significant disease-causing DMR with a robustly underlying DNA defect.

441

442

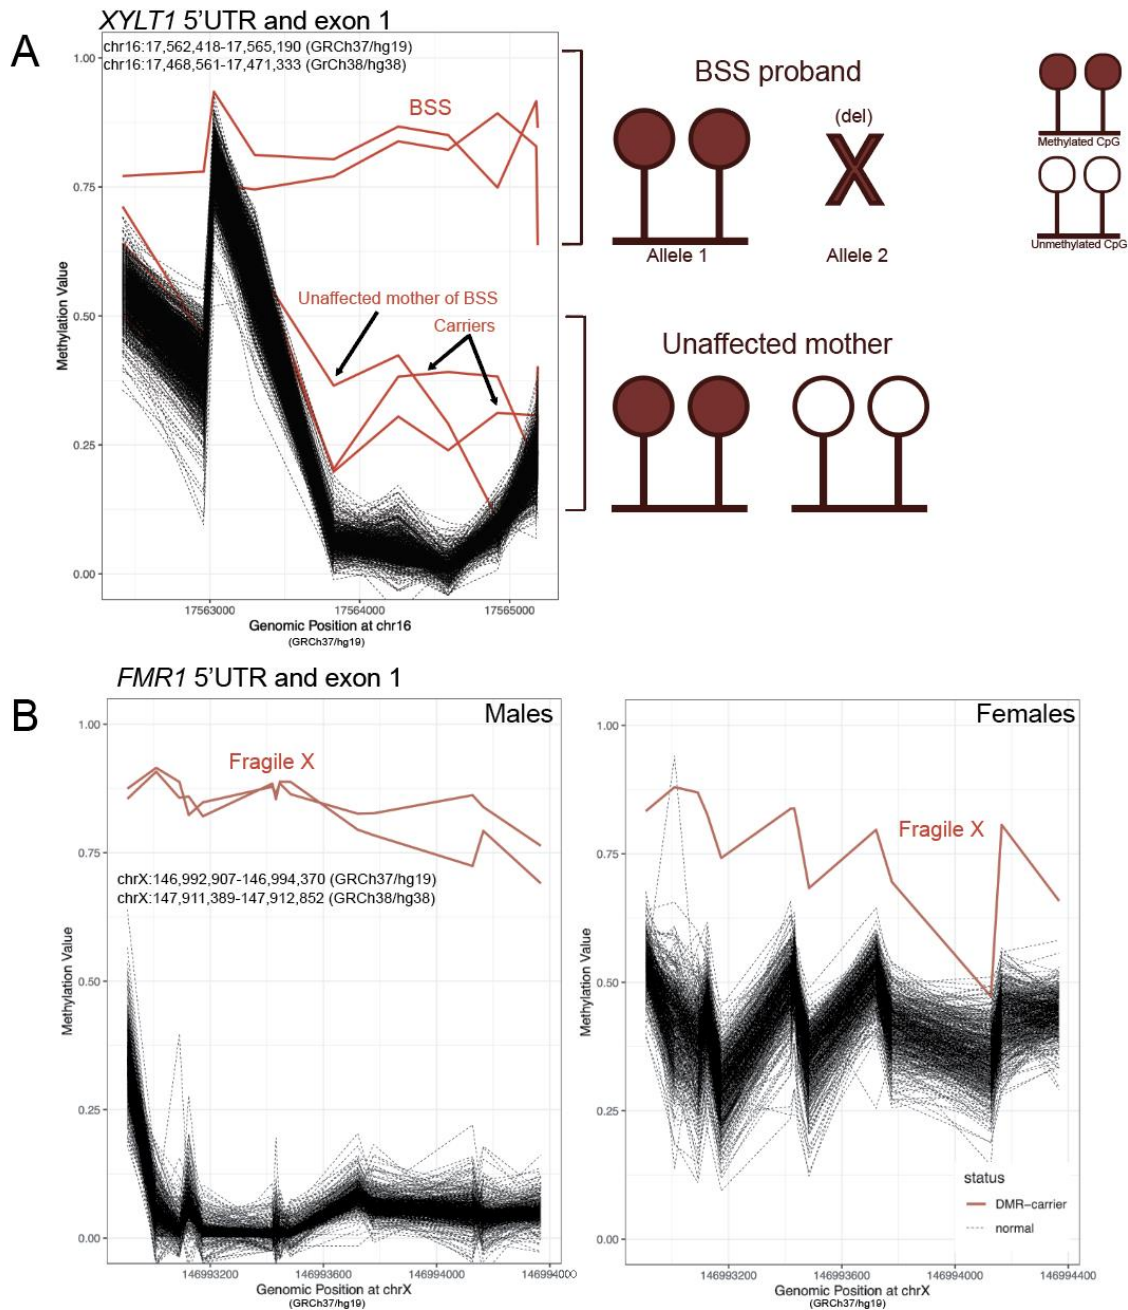

443

444 **Supplementary Figure 2.** DMR plots from rare outlier analysis of known hypermethylation  
 445 events. **A.** DMR plot of the *XYLT1* 5'UTR and exon 1 showing two individuals with Baratela-Scott  
 446 syndrome (BSS) with hemizygous hypermethylation (red) around  $\beta \sim 1$  compared to controls  
 447 (black). Each inflection point corresponds to an individual CpG probe from the array. These  
 448 individuals with BSS harbor hypermethylation of *XYLT1* on one allele and a deletion

449 encompassing this region on the other, represented in the schematic to the right. One unaffected  
450 mother and two other carriers (red) carry heterozygous hypermethylation around  $\beta=0.5$ . **B.** DMR  
451 plots of the *FMR1* 5'UTR and exon 1 with individuals split by males (left) and females (right) for  
452 targeted sex chromosome outlier DMR analysis. Fragile X males and females are clearly  
453 hypermethylated ( $\beta\sim 1$ ) compared to their counterpart controls.

454

455

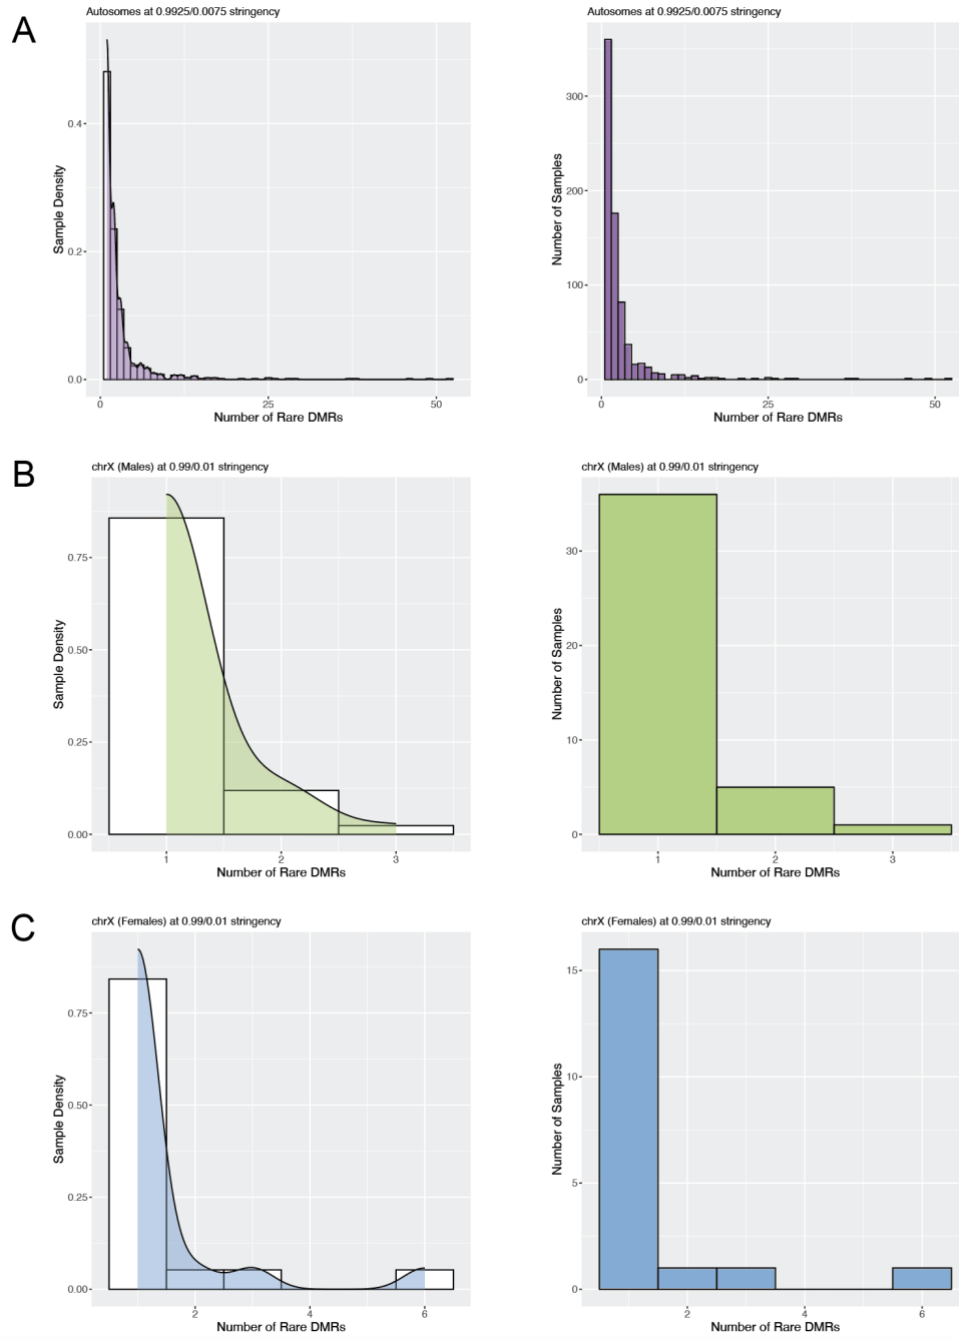

456

457 **Supplementary Figure 3.** Distribution of outlier DMRs across samples. Distribution plots  
 458 showing sample density (left) and sample counts (right). **A.** DMRs called on autosomes  
 459 (n=2,185) are in purple for the cohort (n=1,221 array samples analyzed after positive control  
 460 samples n=3 LCL and n=2 saliva removed from final analysis), **B.** DMRs called on chrX (n=49)  
 461 for male samples (n= 652 array samples analyzed) are in green, and **C.** DMRs called on chrX

462 (n=27) for female samples (n= 569 array samples analyzed) are in blue. In all cases, the  
463 majority of samples carry only 1 DMR, indicating that the outlier criteria were successful in  
464 identifying rare DMRs.  
465



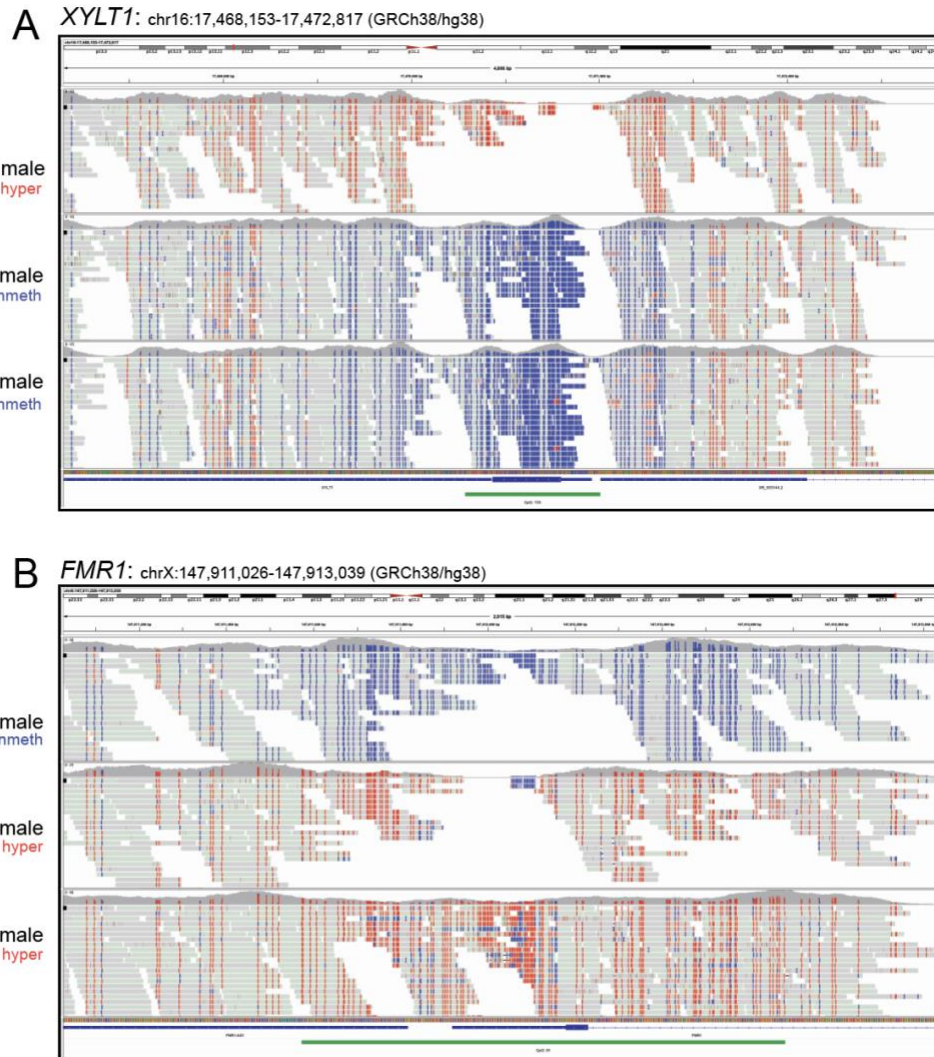

466  
467  
468  
469  
470  
471  
472  
473

**Supplementary Figure 4.** Validation of known outlier DMRs using targeted EM-seq. **A.** IGV view of targeted EM-seq reads at the *XYLT1* 5'UTR and exon 1 that are hypermethylated in an individual with BSS (upper) compared to methylation-negative controls (middle and lower). **B.** IGV screenshot of targeted EM-seq reads at the *FMR1* 5'UTR and exon 1 hypermethylated in Fragile X male and female individuals (middle and lower) compared to methylation-negative control (upper).

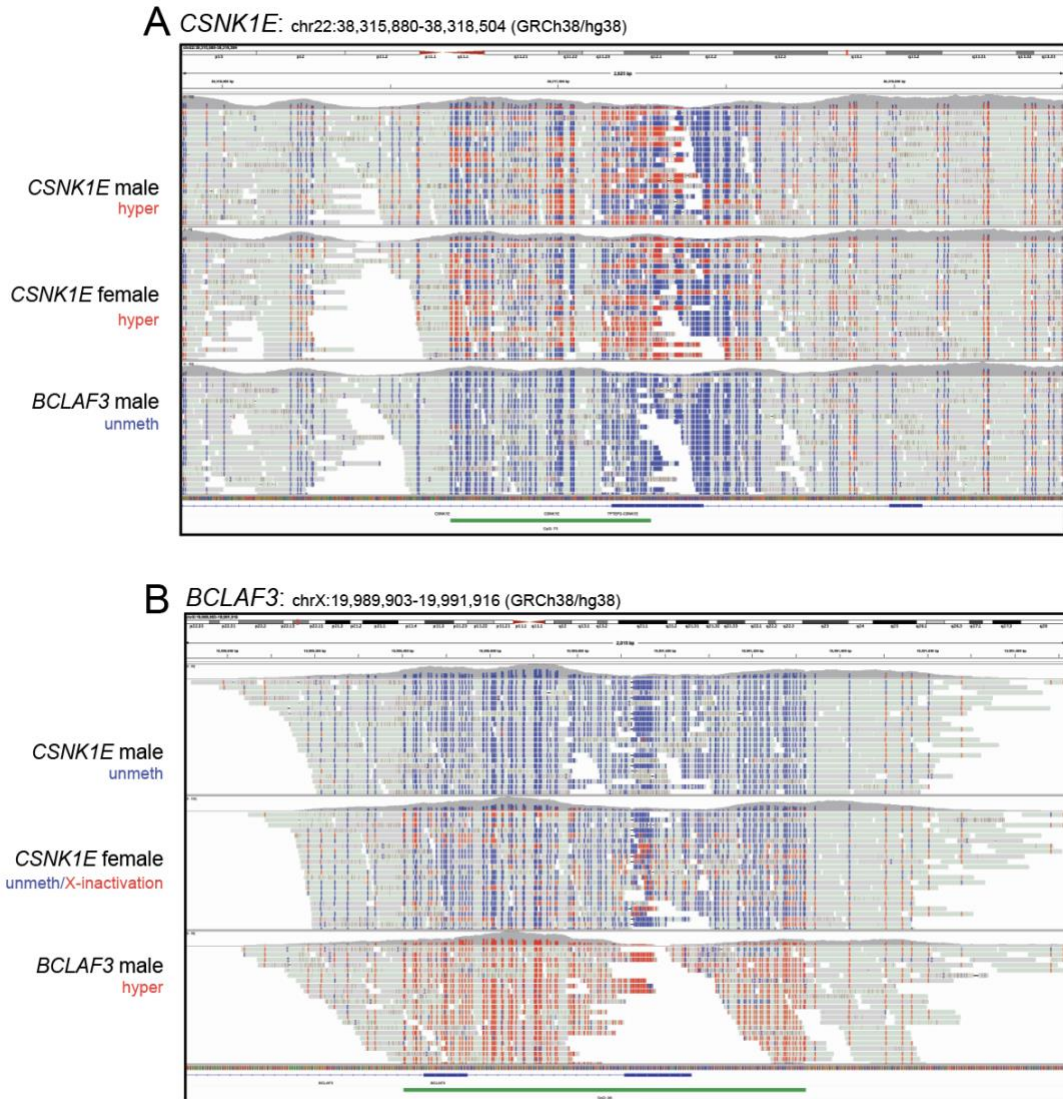

474

475 **Supplementary Figure 5.** Validation of rare outlier DMRs called from methylation array in  
 476 individuals with unsolved DEEs using targeted EM-seq. **A.** IGV view of *CSNK1E* 5'UTR and intron  
 477 1 validating heterozygous hypermethylation in two individuals with unsolved DEEs (upper and  
 478 middle) compared to methylation-negative control (lower). **B.** IGV view of *BCLAF3* 5'UTR  
 479 validating hemizygous hypermethylation called from methylation array in a male individual with  
 480 unsolved DEEs (lower) compared to methylation-negative controls (upper and middle).

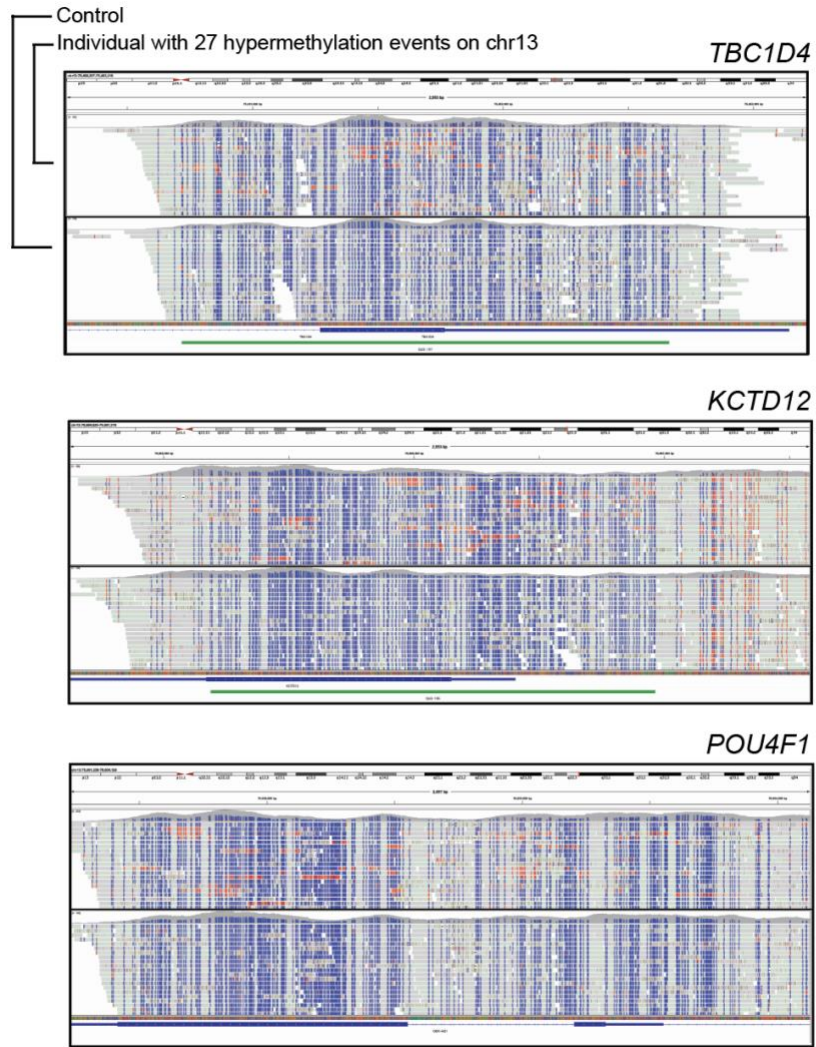

481

482 **Supplementary Figure 6.** Validation of rare outlier DMRs on chr13 in a single individual using  
 483 targeted EM-seq. Representative images depict IGV views for 3/26 DMRs on chr13 for an  
 484 individual with unsolved DEE (upper panel of each box) compared to a control (lower panel of  
 485 each box).

486

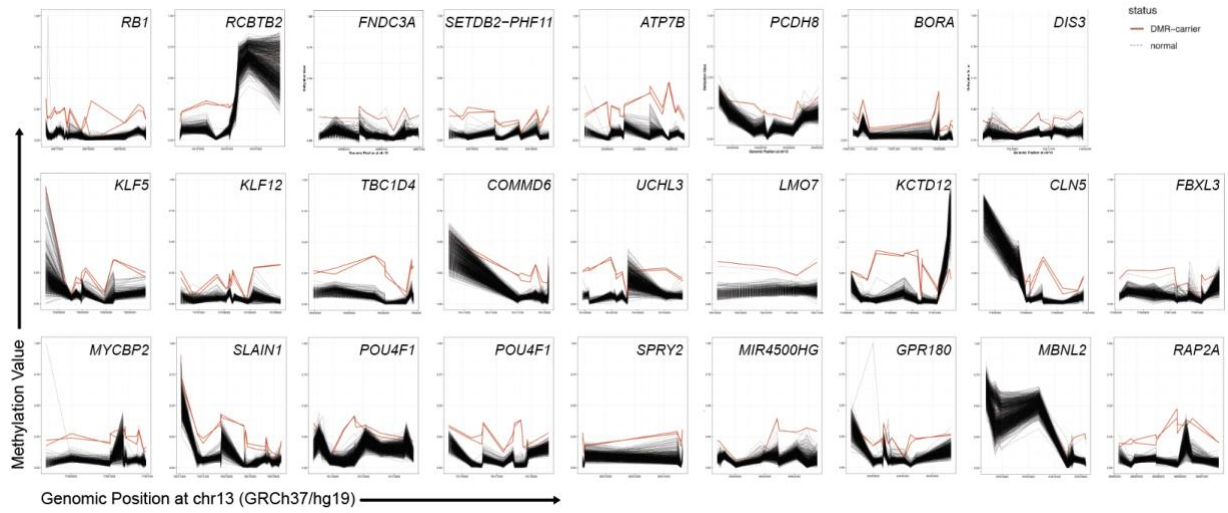

487

488 **Supplementary Figure 7.** Individual with unsolved DEE displaying multiple hypermethylated  
 489 DMRs across chr13. DMR plots depicting DNA methylation array data are shown for all n=26  
 490 outlier DMRs called for an individual with unsolved DEE (red) compared to controls (black).

491

492

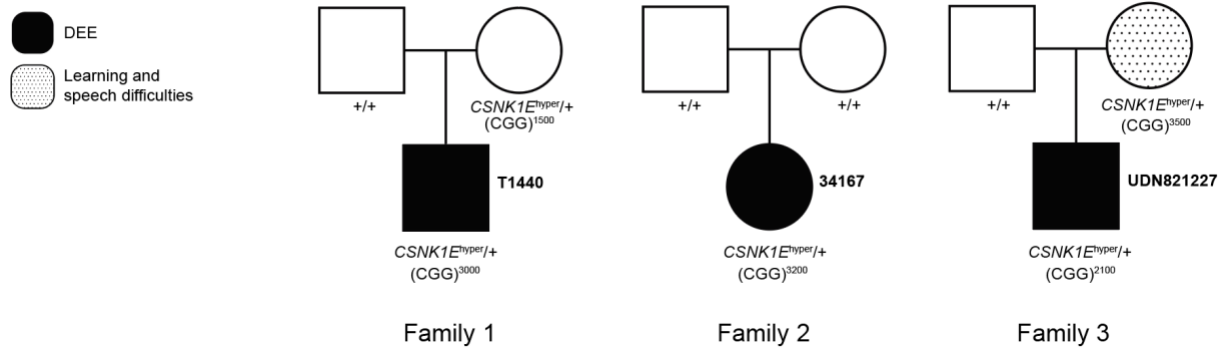

|                                                                                                                   | Family 1                                                                           | Family 2                                          | Family 3                                                                         |
|-------------------------------------------------------------------------------------------------------------------|------------------------------------------------------------------------------------|---------------------------------------------------|----------------------------------------------------------------------------------|
| Methylation array (Blood)<br>    | Maternally inherited hypermethylation                                              | <i>de novo</i> hypermethylation                   | Maternally inherited hypermethylation                                            |
| Long-read sequencing (Blood)<br> | 1,500-3,000bp CGG repeat expansion in the proband inherited from mother (~1,500bp) | 1,100-3,200bp CGG repeat expansion in the proband | 1,300-2,100bp CGG repeat expansion in proband inherited from mother (~270-3,500) |
| RNA-seq (Fibroblasts)<br>        | NA                                                                                 | Decreased gene expression in proband              | Decreased gene expression in proband and mother                                  |

493

494

495

496

497

498

499

500

501

**Supplementary Figure 8.** Family pedigrees for a cohort of individuals with unsolved DEEs displaying hypermethylation of the 5'UTR and exon 1 of *CSNK1E*. Pedigrees show the inheritance patterns of *CSNK1E* hypermethylation and affected vs. unaffected status across the families. The lower table shows the data types analyzed from each family and a summary of any associated results. The schematics shown on the left panel were created with BioRender.com and released under a Creative Commons Attribution-Non-Commercial-NoDerivs 4.0 International License (CC-BY-NC-ND).

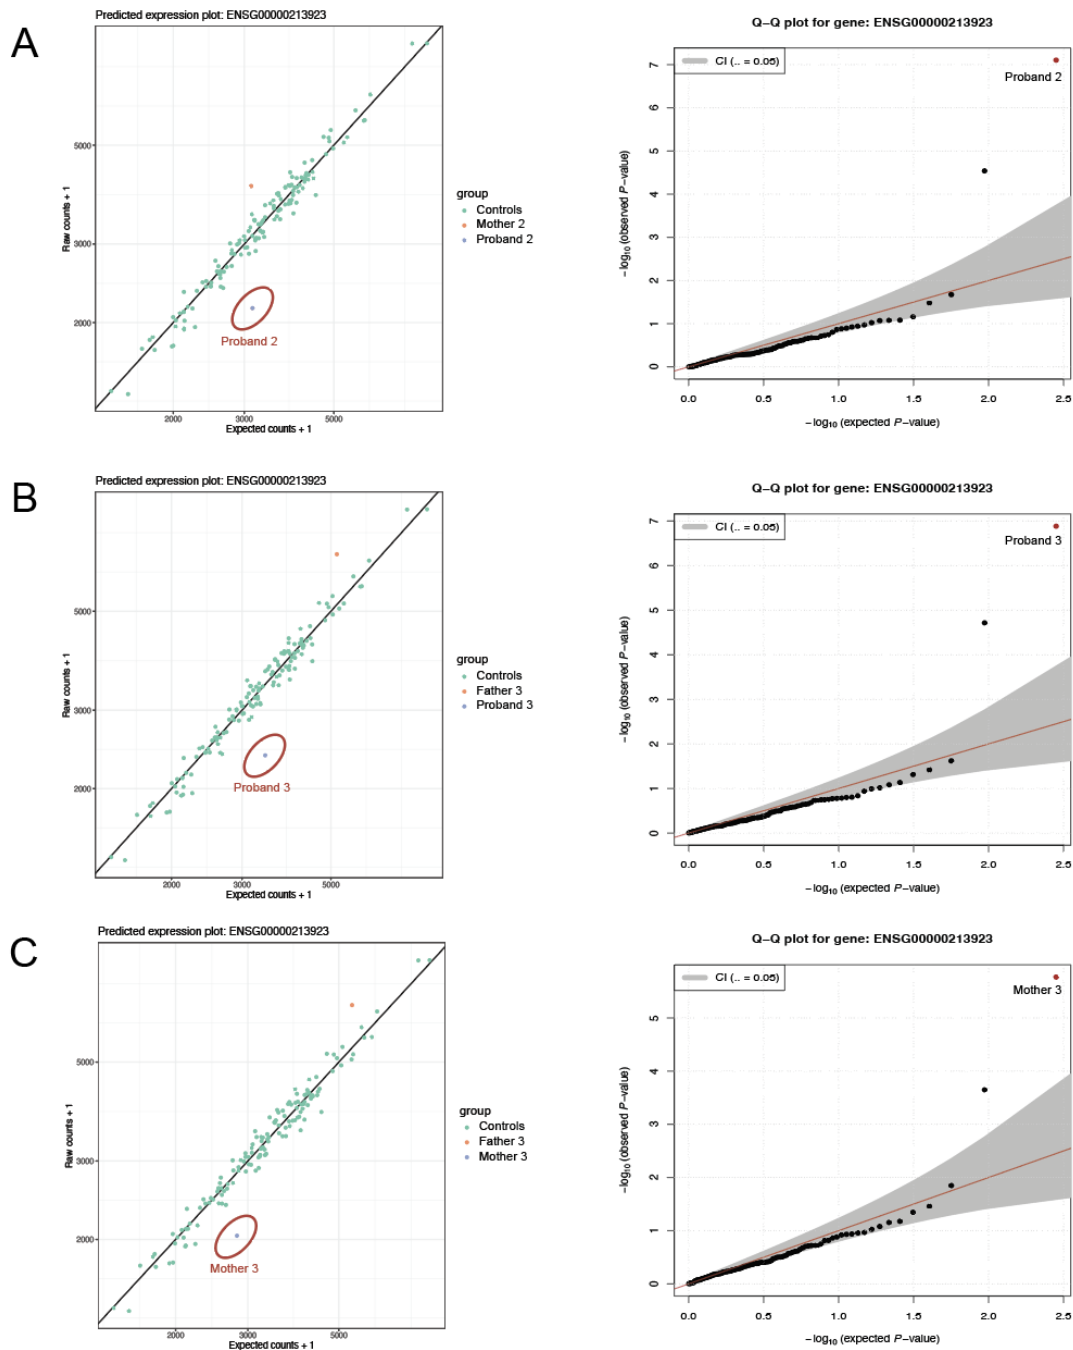

502

503 **Supplementary Figure 9.** Dropout Analysis of RNA-seq data for *CSNK1E* from human-derived  
 504 fibroblasts by family. OUTRIDER predicted expression plot is shown on the left and Q-Q plot on  
 505 the right. **A.** Proband 2 “drops out” for *CSNK1E* expression ( $p_{adj}=0.00112276$ ,  $zScore=-5.63$ ,  
 506  $\log_2FC=-0.55$ ) compared to Mother 2 and control fibroblast cohort of 139 publicly available

507 samples<sup>31</sup>. **B.** Proband 3 “drops out” for *CSNK1E* expression compared to Father 3 and the control  
508 fibroblast cohort (*p*<sub>adj</sub>=0.00228623, zScore=-5.54, log<sub>2</sub>FC=-0.53). **C.** Mother 3 “drops out” for  
509 *CSNK1E* expression compared to Father 3 and the control fibroblast cohort (*p*<sub>adj</sub>=0.021391407,  
510 zScore=-5.02, log<sub>2</sub>FC=-0.47).

511

512

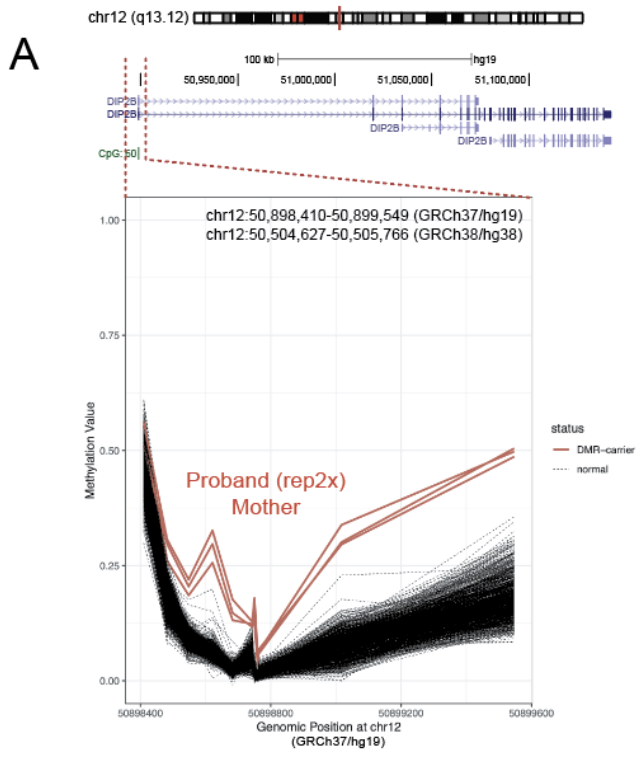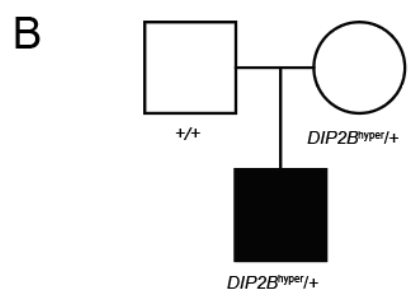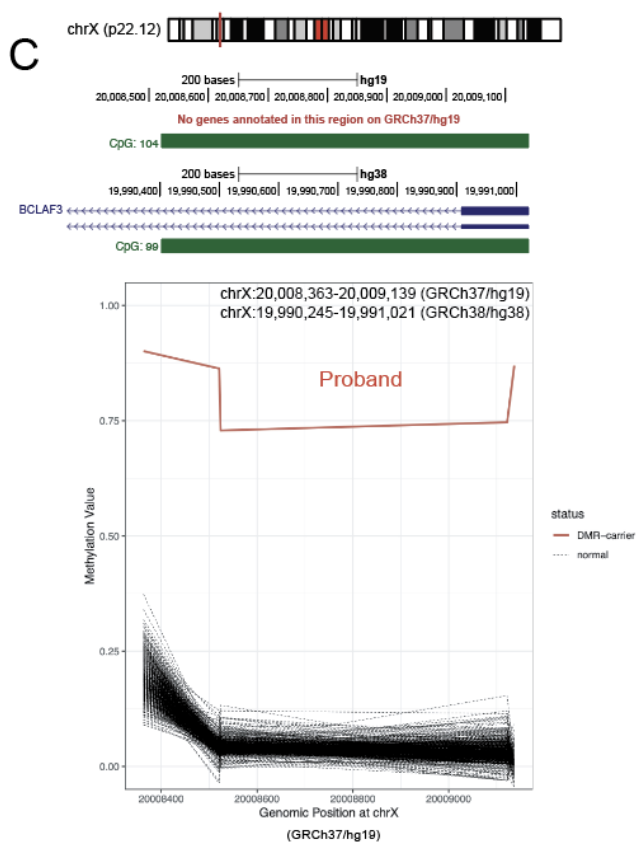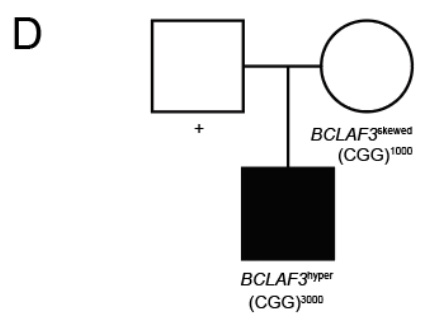



514 **Supplementary Figure 10.** Outlier hypermethylation of regions underlying known and novel  
515 repeat expansions. **A.** DMR plot for outlier hypermethylated DMR at the *DIP2B* promoter and  
516 exon 1 in a proband with unsolved DEE (repeated twice on the methylation array) and his mother  
517 (both in red). **B.** Pedigree showing inheritance pattern of the *DIP2B* DMR. **C.** DMR plot of targeted  
518 X chromosome analysis in males depicting outlier hypermethylated DMR at an intergenic region  
519 (by GRCh37/hg19 annotation) and exon 1 of an uncharacterized gene *BCLAF3* (by GRCh38/hg38  
520 annotation) in a male proband with unsolved DEE. **D.** Pedigree shows CGG *BCLAF3* repeat  
521 expansion is inherited from the mother and expanded in the proband. Data for the repeat  
522 expansion are shown in Figure S11.

523

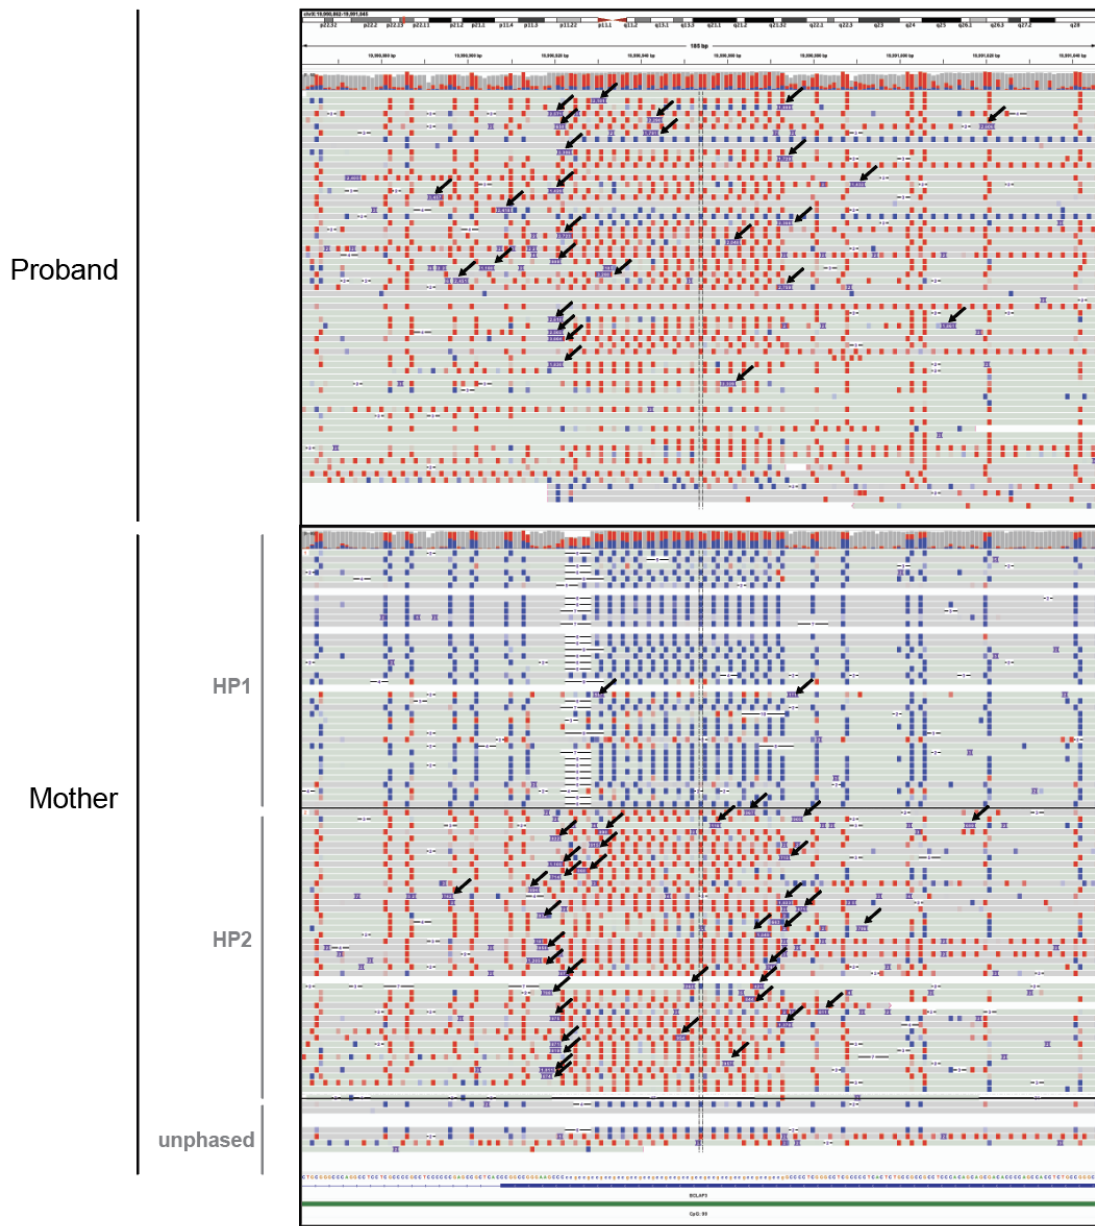

524

525 **Supplementary Figure 11.** Long-read sequencing identifies a novel repeat expansion at the  
 526 5'UTR of *BCLAF3*. ONT long-read sequencing reads in IGV phased for 5mC for the proband  
 527 validating *BCLAF3* hypermethylation (top panel). Long-read sequencing further indicates a novel  
 528 ~2,500-3,000bp CG-rich repeat expansion (arrows). Haplotype resolved ONT long-read  
 529 sequencing reads in IGV for the proband's mother (bottom panel) displaying smaller ~700-  
 530 1,000bp CG-rich repeat expansion (arrows). Haplotype resolution also indicates that the mother's

531 X-chromosome inactivation is skewed against the repeat allele, not a random 50/50  
532 hypermethylation across both X chromosomes.

533

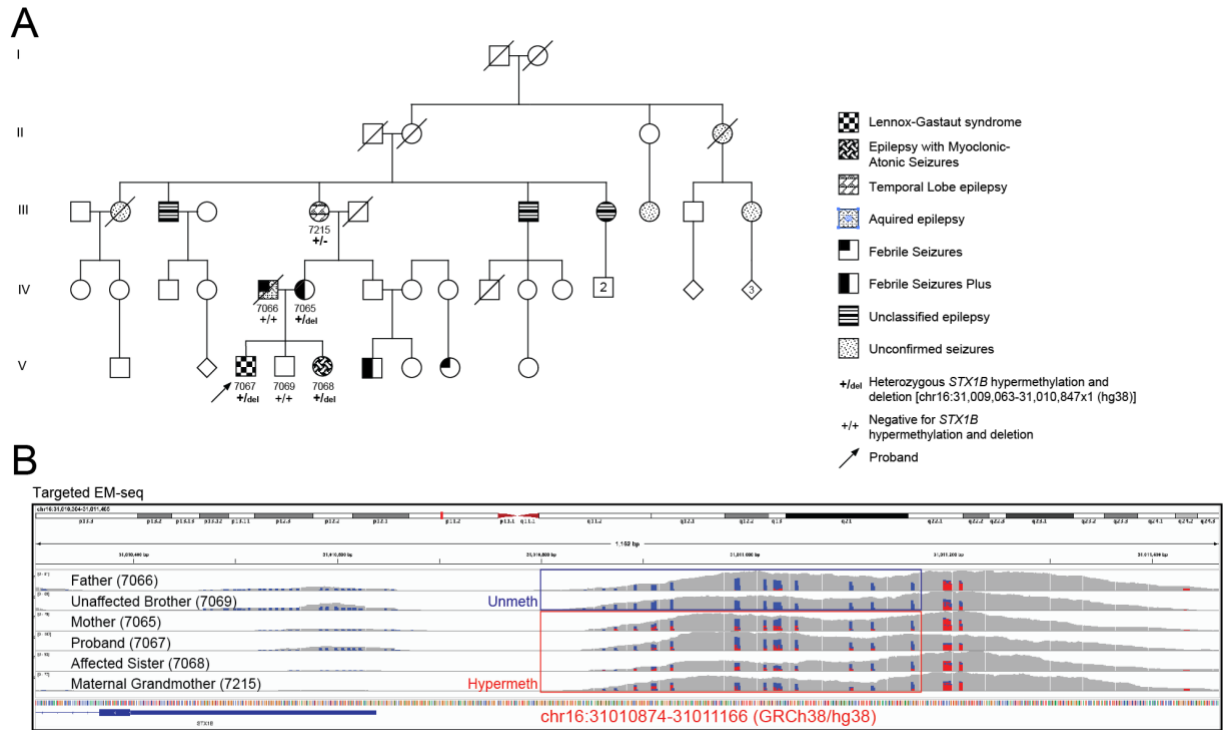

534

535 **Supplementary Figure 12:** Hypermethylation of the *STX1B* TSS and promoter validated by

536 targeted EM-seq in a family with GEFs+ phenotypes. **A.** Extended pedigree for the family of

537 proband 7067 displaying related phenotypes throughout the maternal side and extended family.

538 **B.** Coverage traces from targeted EM-seq data depict the proportion of methylated (red) and

539 unmethylated (blue) CpGs in the *STX1B* DMR. Hypermethylation is validated, and boundaries of

540 DNA methylation are extended in proband, affected sister, affected mother, and affected maternal

541 grandmother. The unaffected brother and father are unmethylated.

542

A

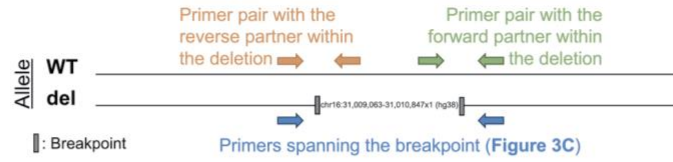

B

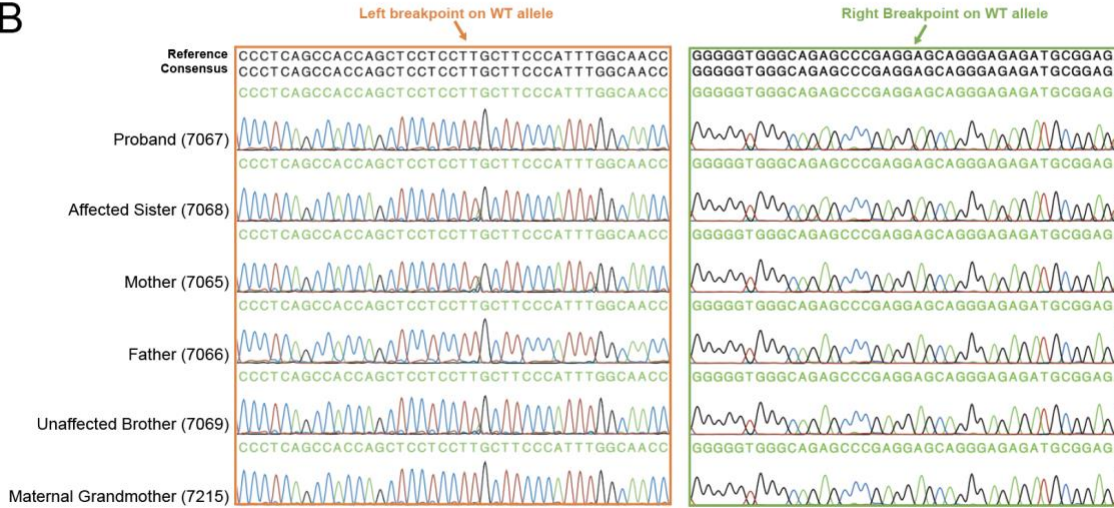

543

544

**Supplementary Figure 13:** A deletion encompassing intron 1, exon 1, the TSS, and the promoter

545

of *STX1B* in a family with GEFs+ phenotypes. **A.** Schema of PCR validation strategy, including

546

the wild-type (WT) and deletion (del) alleles. **B.** Control PCR showing the breakpoint regions on

547

the WT allele (orange and green) where a PCR product is obtained for the unaffected brother and

548

father. This contrasts with the PCR shown in Figure 3C, where no PCR product is obtained for

549

the unaffected brother and father for the primer pair that spans the breakpoints, indicating that

550

they each do not carry the deletion.

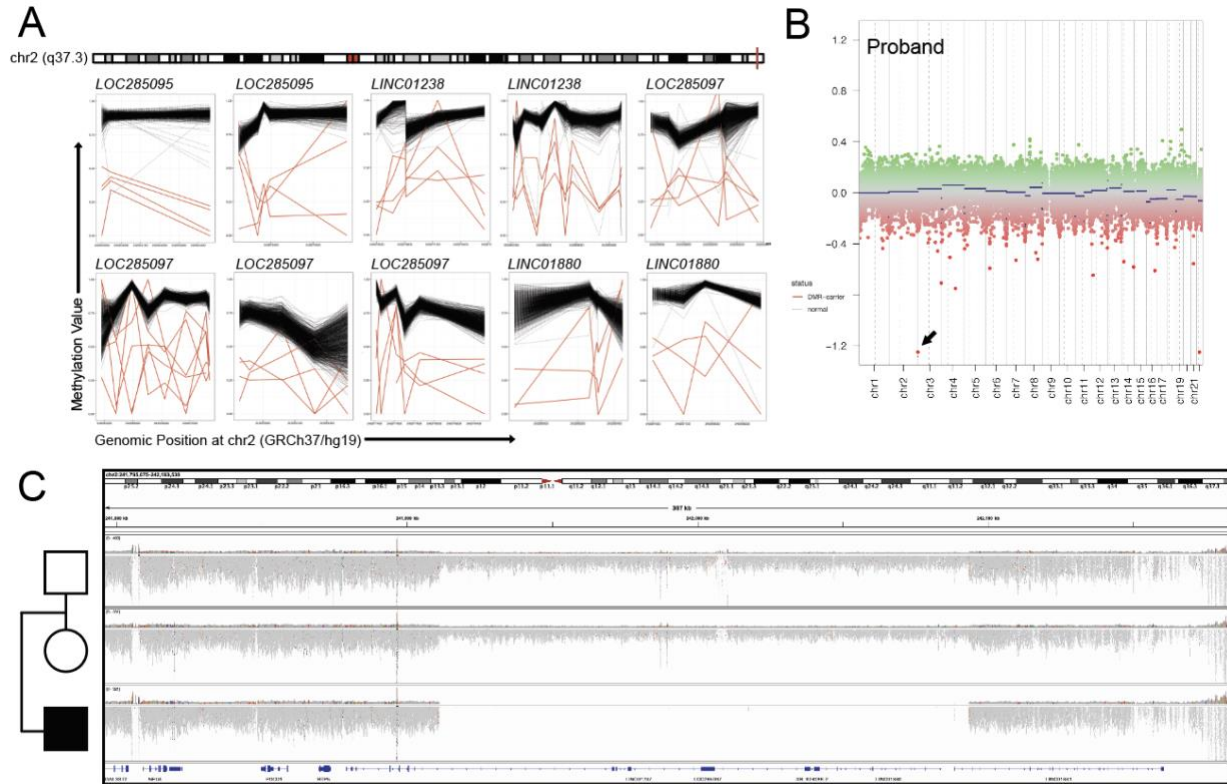

551

552 **Supplementary Figure 14.** Outlier “DMRs” at chr2 represent copy number deletion. **A.** DMR plots

553 showing 10 representative “hypomethylated DMRs” across 2q37.3 for an individual with unsolved

554 DEE (run in triplicate, red) and one control (red). **B.** CNV calling from the array with the R package

555 “conumee” detects copy number deletion overlapping with chr2 DMR locus in individual with

556 unsolved DEE. **C.** GS of trio identifies inherited homozygous copy number deletion in proband.

557

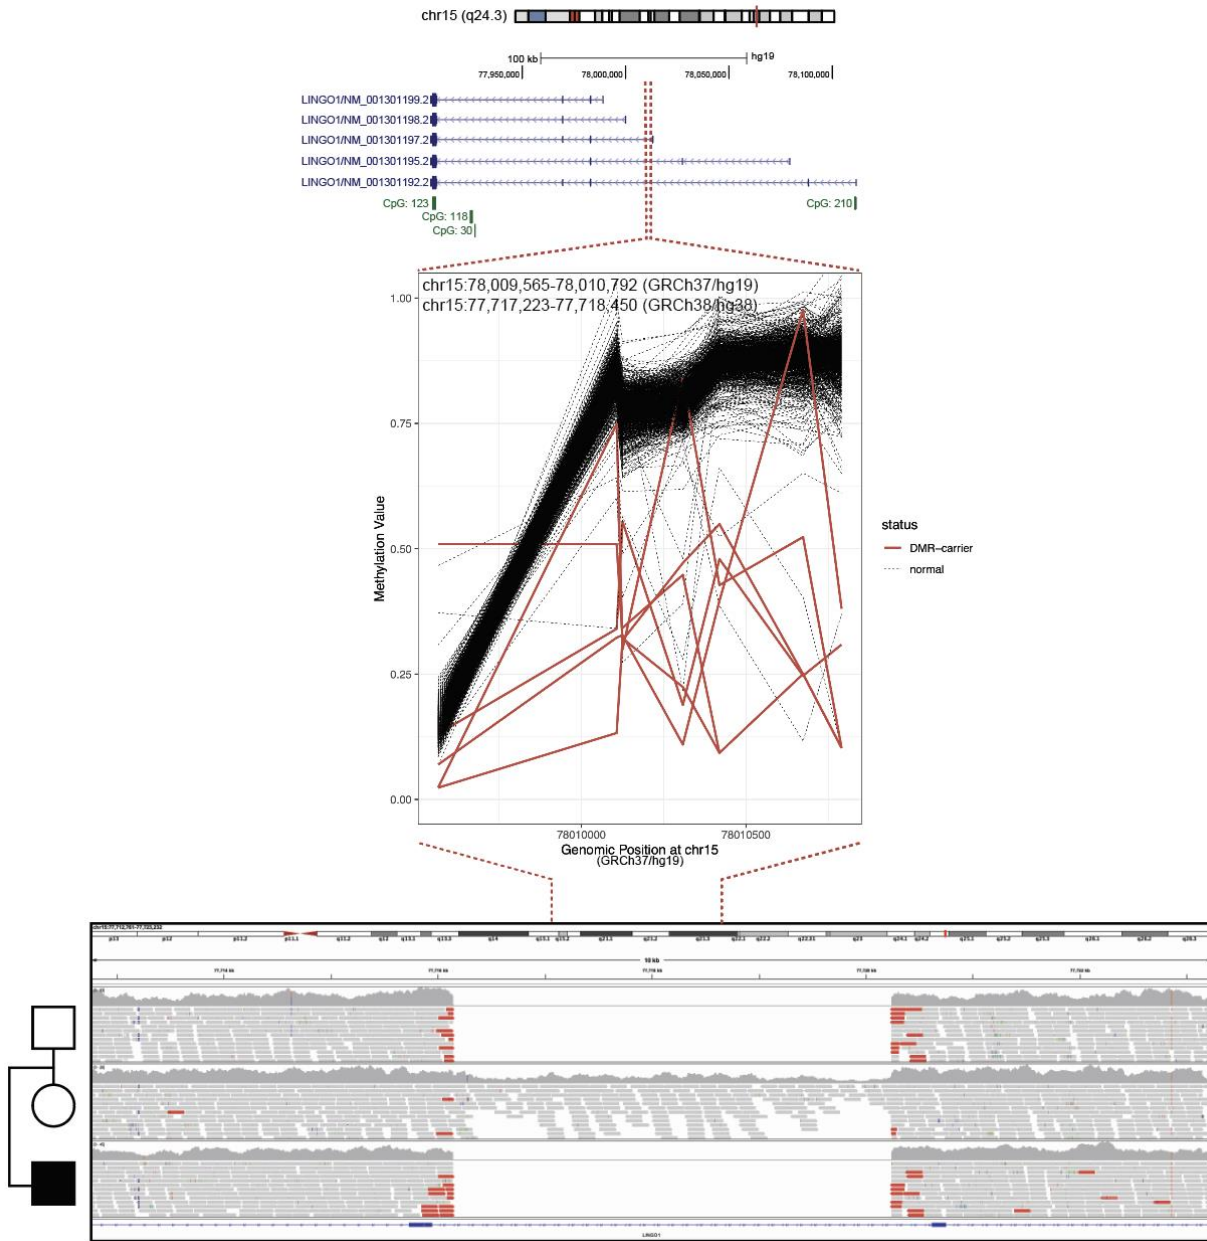

558

559 **Supplementary Figure 15.** Outlier “DMR” at *LINGO1* intron represents copy number deletion.

560 Annotation track showing the location of DMR in different *LINGO1* transcripts (upper). DMR plot

561 showing hypomethylated DMR detected in several DMR carriers, including a proband with two

562 replicates and a mother. GS detects inherited copy number deletion in the proband (lower).

563

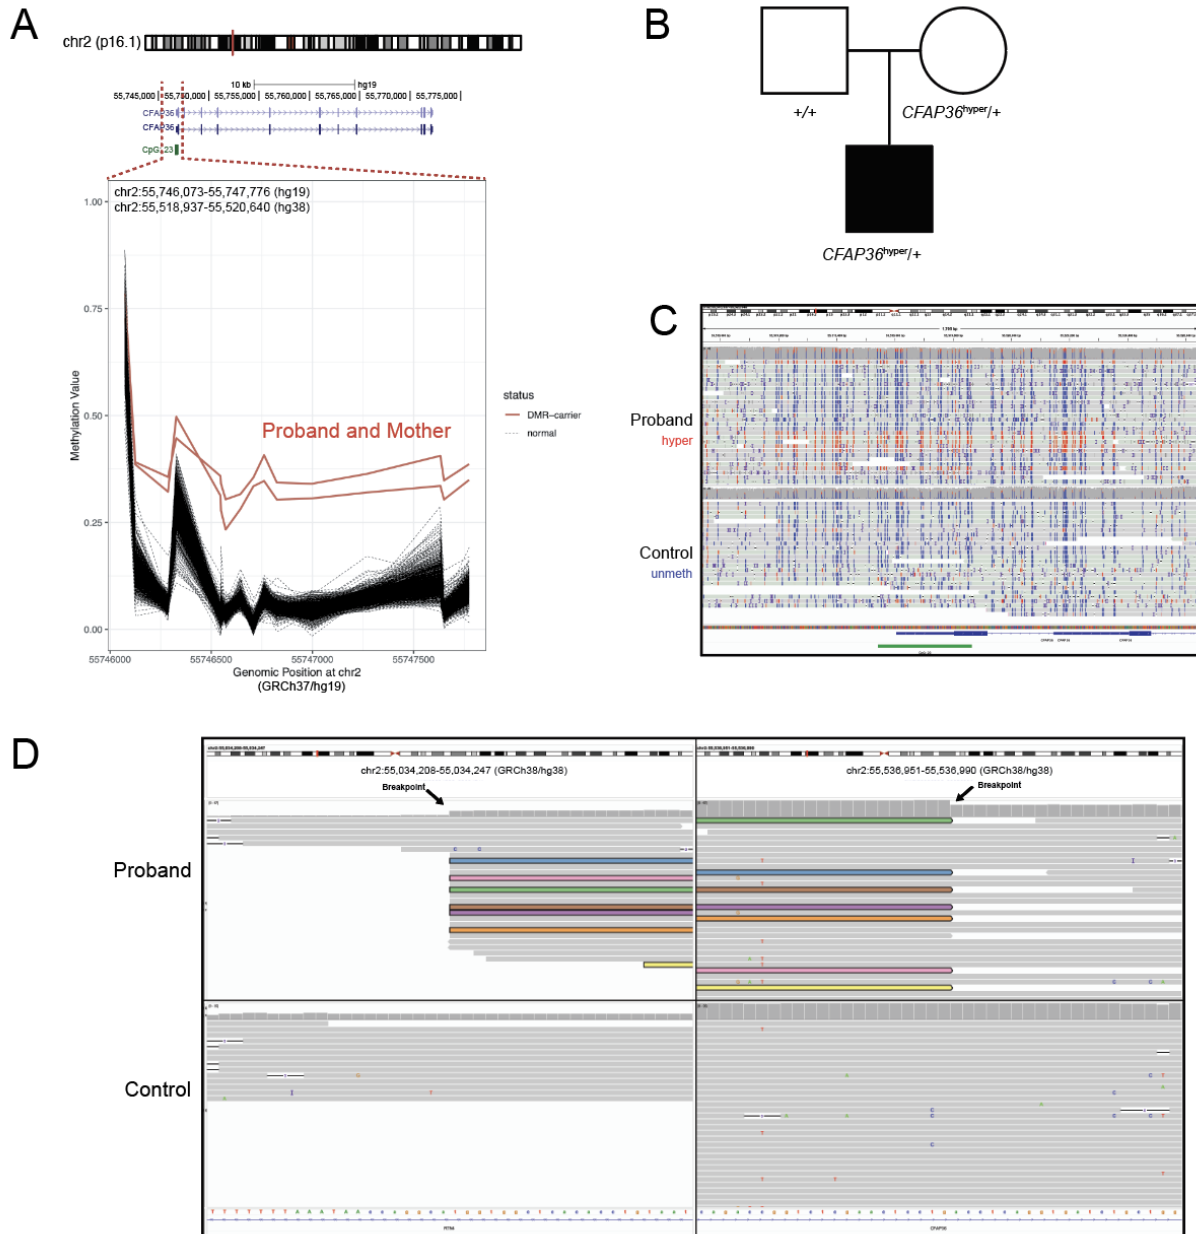

564

565 **Supplementary Figure 16.** Outlier hypermethylated DMR at *CFAP36* due to a tandem  
 566 duplication. **A.** DMR plot showing hypermethylation at *CFAP36* in a proband with unsolved DEE  
 567 and mother. **B.** Pedigree depicting inheritance pattern of DMR. **C.** IGV screenshot of targeted  
 568 ONT long reads phased for 5mC at DMR region validating hypermethylation called from the array.  
 569 **D.** IGV screenshot showing the location of the breakpoints of the tandem duplication and  
 570 associated “dip” in coverage. Some but not all the reads showing the breakpoint are colored. The



571 upstream breakpoint (left) was not included in the adaptive sampling target region and therefore  
572 has lower coverage compared to the target region.

573

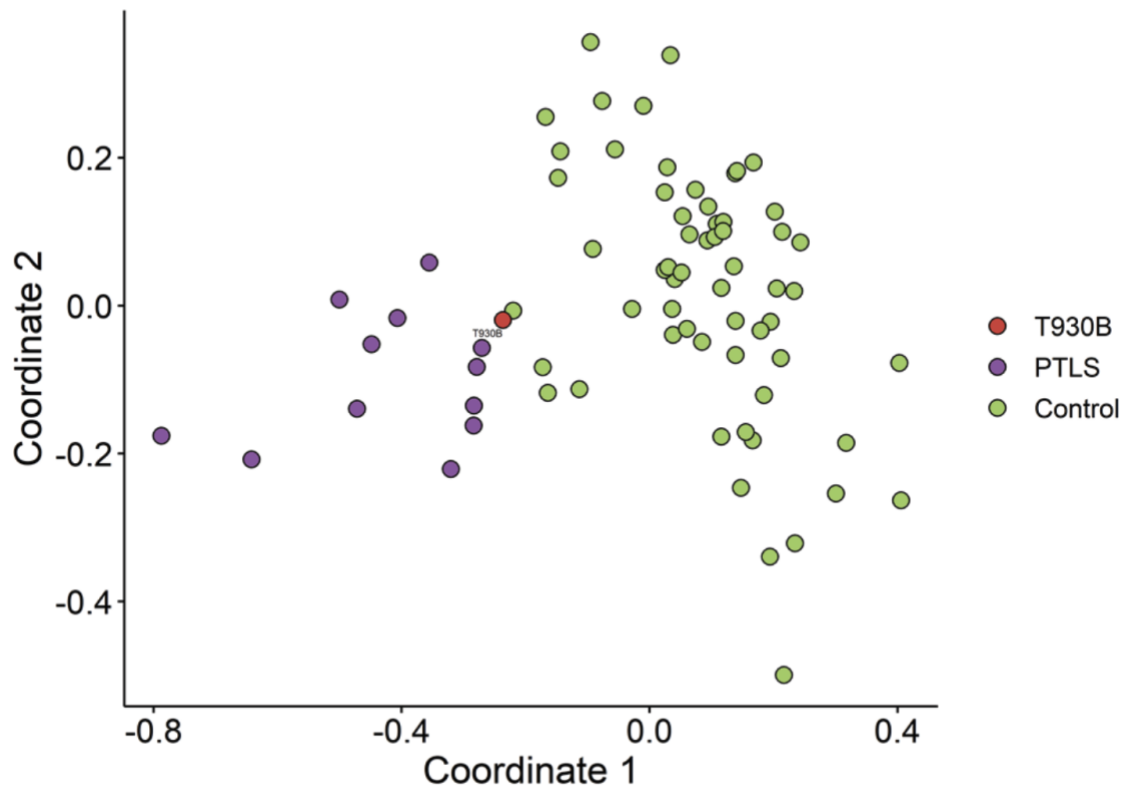

574

575 **Supplementary Figure 17.** Inconclusive episignature results. An example of inconclusive results  
576 for Potocki-Lupski syndrome (PTLS) episignature. Individual T930B (red) was reported as  
577 inconclusive for PTLs due to a low MVP score of 0.053 and inconsistent MDS clustering between  
578 cases (purple) and unaffected controls (green). Inconclusive episignature results are reported  
579 with the caveat that further follow up or investigation may be warranted if there is a clinical  
580 phenotype consistent with the inconclusive episignature in question.

581

582

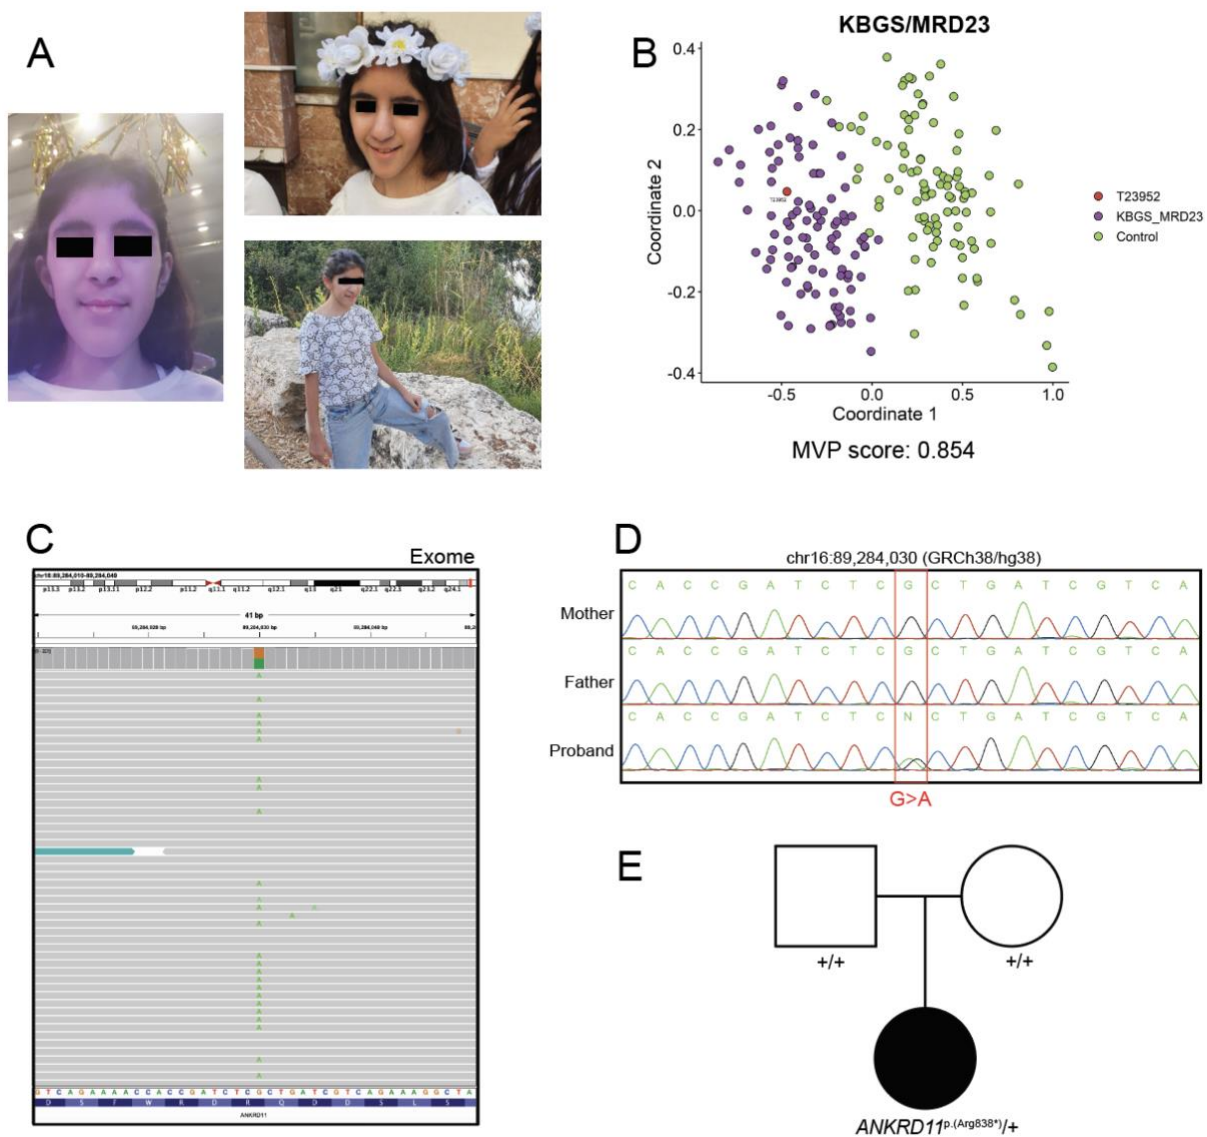

583

584 **Supplementary Figure 18.** Diagnosis of *ANKRD11* enabled by episignature screening. **A.**

585 Photos of affected individual displaying dysmorphic features, including triangular face, bulbous  
586 nose, thin upper lip, featureless philtrum, broad bushy eyebrows, large prominent ears, thin upper

587 lip. **B.** Multidimensional scaling (MDS) plot showing how proband (red) clusters with

588 KBGS\_MRD23 episignature (purple). **C.** IGV screenshot of a pathogenic variant in *ANKRD11*

589 detected by exome sequencing. **D.** PCR validation and segregation of the variant. **E.** Pedigree

590 indicating that the variant occurs *de novo*.

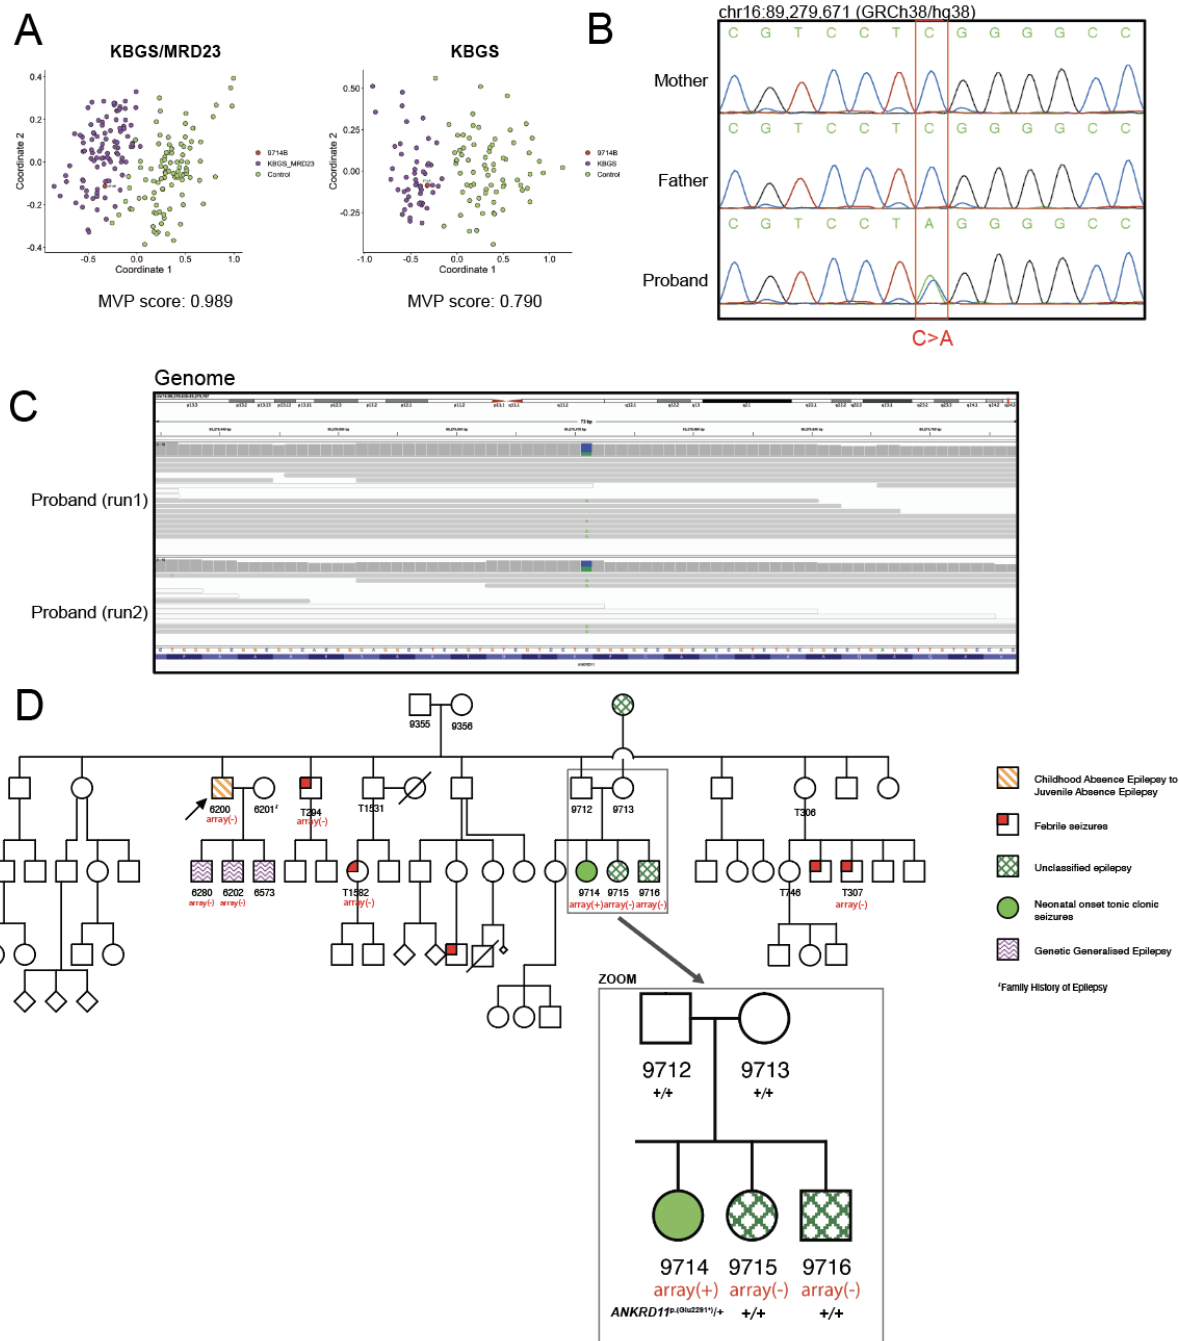

591

592 **Supplementary Figure 19.** Diagnosis of *ANKRD11* enabled by episignature screening. **A.** MDS

593 plot showing proband (red) clustering with KBGS\_MRD23 affected controls (purple, left) and

594 further clustering with the secondary KBGS signature (purple, right). **B.** Sanger sequencing

595 validation and segregation of pathogenic variant recovered from **C.** Two low coverage GS runs

596 showing the presence of the pathogenic variant. **D.** Familial pedigree illustrating multiple

597 generations and manifestations of epilepsy. "Array" in red indicates that DNA methylation array  
598 on proband and additional affected family members (n=8). The red (+) indicates the individual  
599 was epesignature positive, and (-) indicates epesignature negative. Since the variant is *de novo*  
600 and not present in any of the tested affected family members, *ANKRD11* variation is not the  
601 cause of the familial epilepsy but explains the more severe phenotype of 9714.  
602

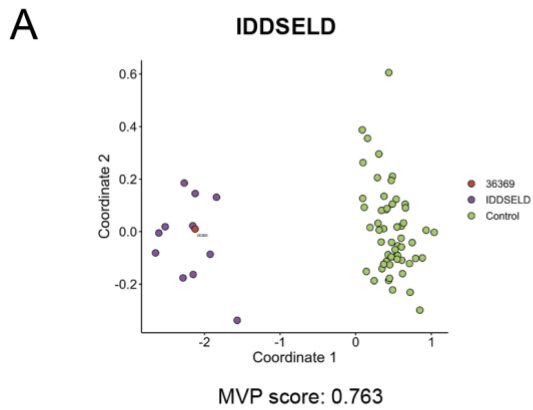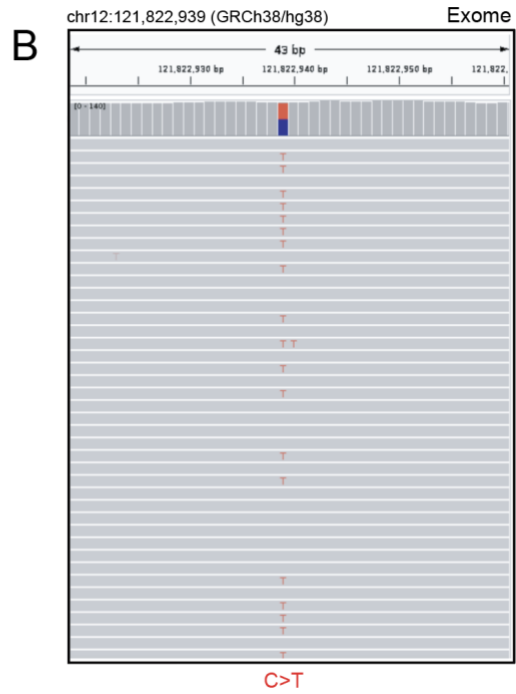

603

604 **Supplementary Figure 20.** Diagnosis of *SETD1B* enabled by episignature screening. **A.** MDS  
 605 plot showing clustering of the proband (red) with the IDDSELD episignature (purple). **B.** IGV  
 606 screenshot of pathogenic variant identified by exome sequencing.

607

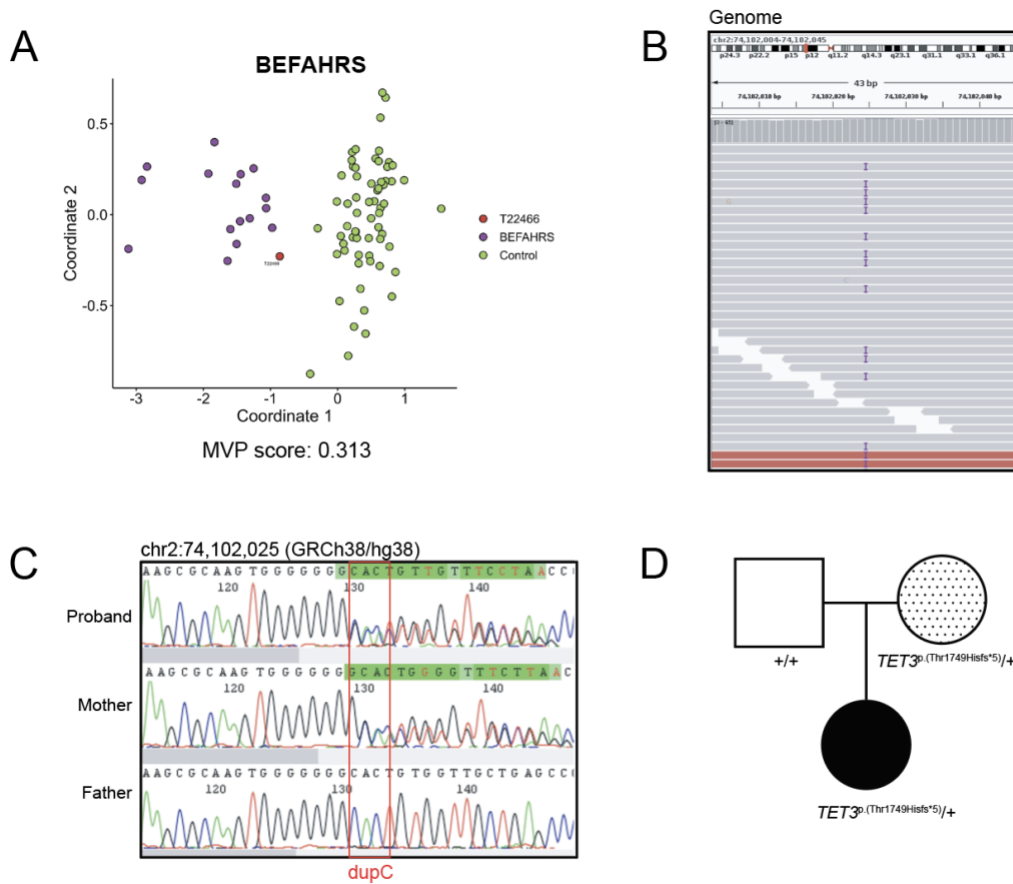

608

609 **Supplementary Figure 21.** Diagnosis of *TET3* enabled by epismature screening. **A.** MDS plot  
 610 showing clustering of the proband with the BEFAHRS epismature. **B.** IGV screenshot of  
 611 pathogenic duplication identified through GS. **C.** Sanger sequencing validation and segregation  
 612 of variant indicating that **D.** the *TET3* variant is inherited from the mother, who is mildly  
 613 phenotypically affected (Supplementary Phenotype data).

614

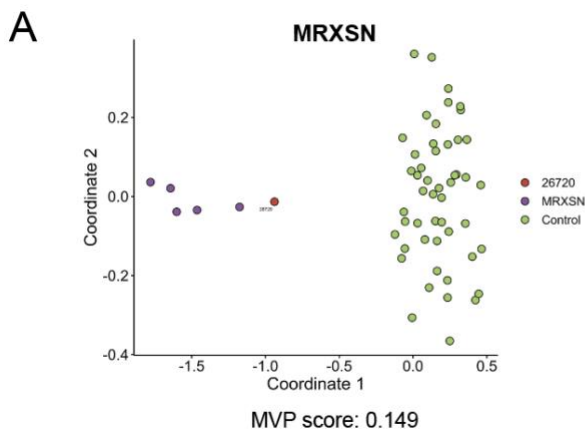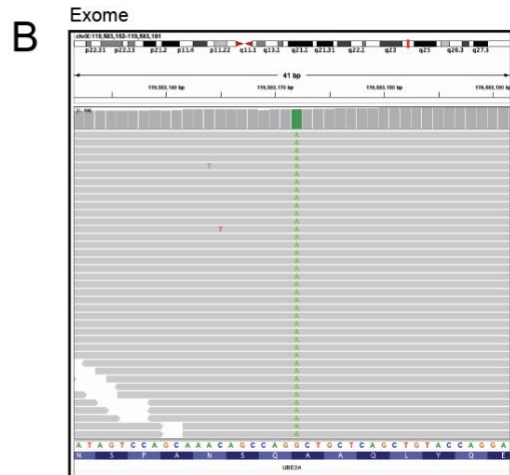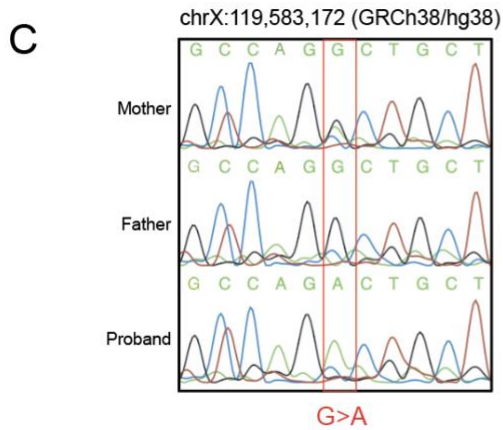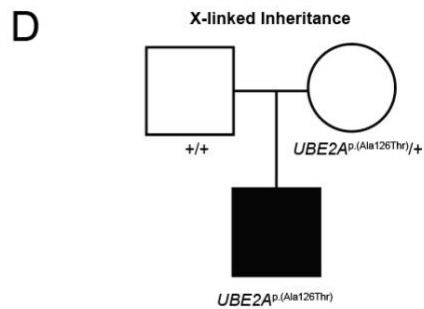

615

616 **Supplementary Figure 22.** Diagnosis of *UBE2A* enabled by episignature screening. **A.** MDS plot  
 617 showing clustering of the proband with the MRXSN episignature. **B.** IGV screenshot of  
 618 hemizygous variant of uncertain significance identified by exome sequencing. **C.** Sanger  
 619 sequencing validation and segregation of variant, **D.** determined to X-linked and maternally  
 620 inherited. Variant was determined to be pathogenic by clinical workup.

621



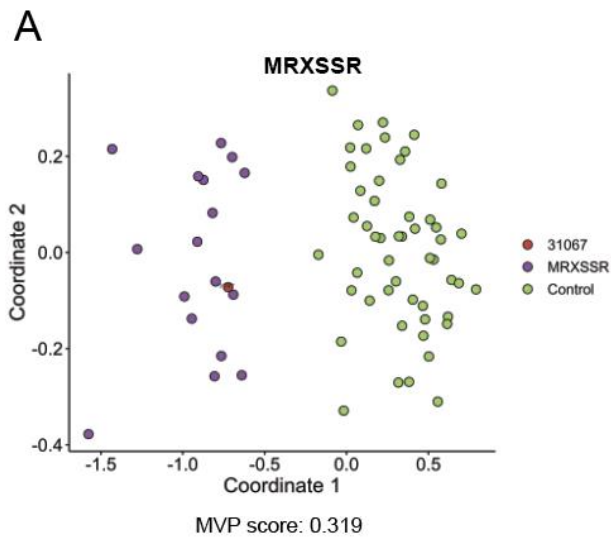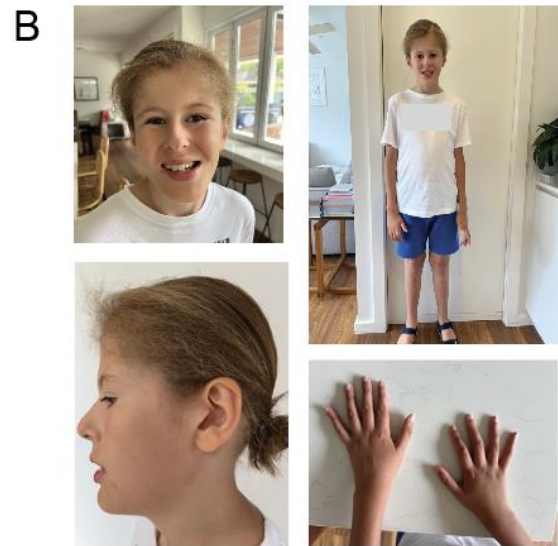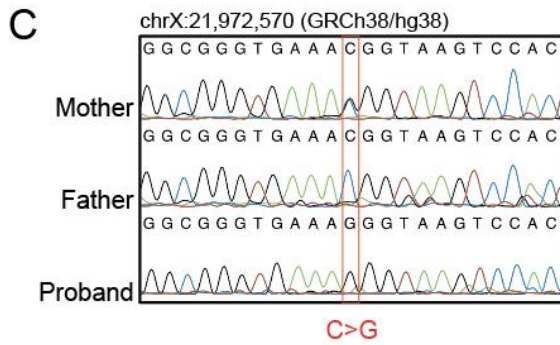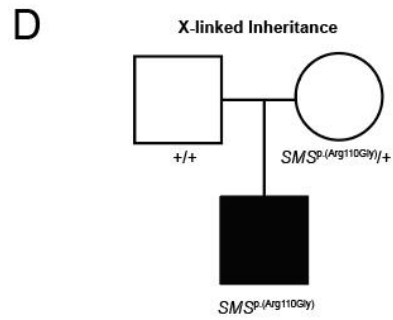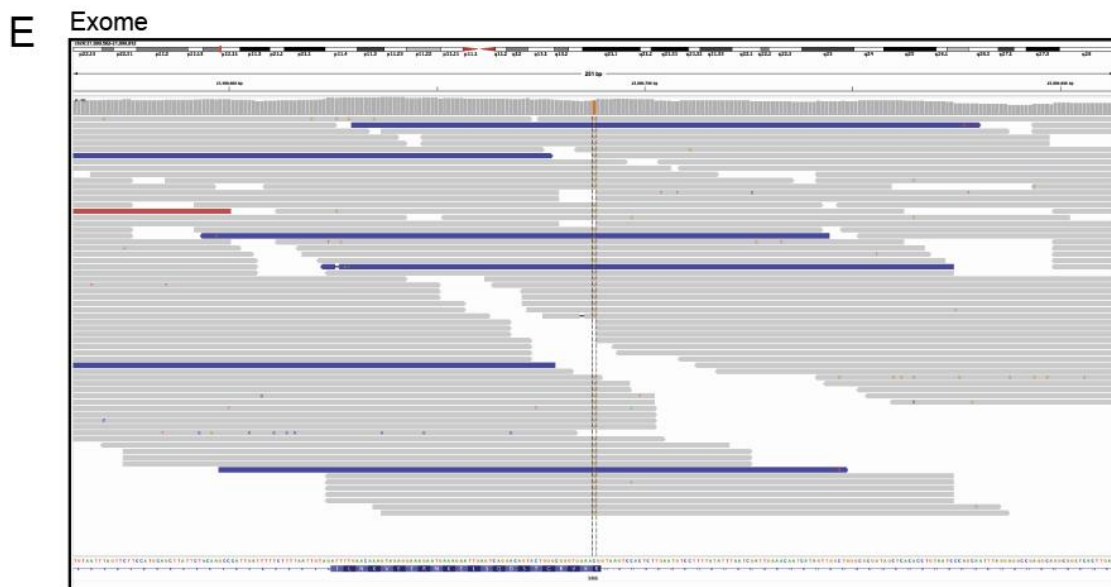

623 **Supplementary Figure 23.** Diagnosis of *SMS* enabled by episinature screening. **A.** MDS plot  
624 showing clustering of the proband with the MRXSSR episinature. **B.** Photos of 31067 displaying  
625 dysmorphic features, including friable hair, thin upper lip, fine eyebrows, low anterior hairline, and  
626 long, thin fingers. **C.** Sanger sequencing validation and segregation of variant, **D.** determined to  
627 X-linked and maternally inherited. **E.** IGV screenshot of hemizygous variant identified by exome  
628 sequencing. Variant was determined to be pathogenic by clinical workup.

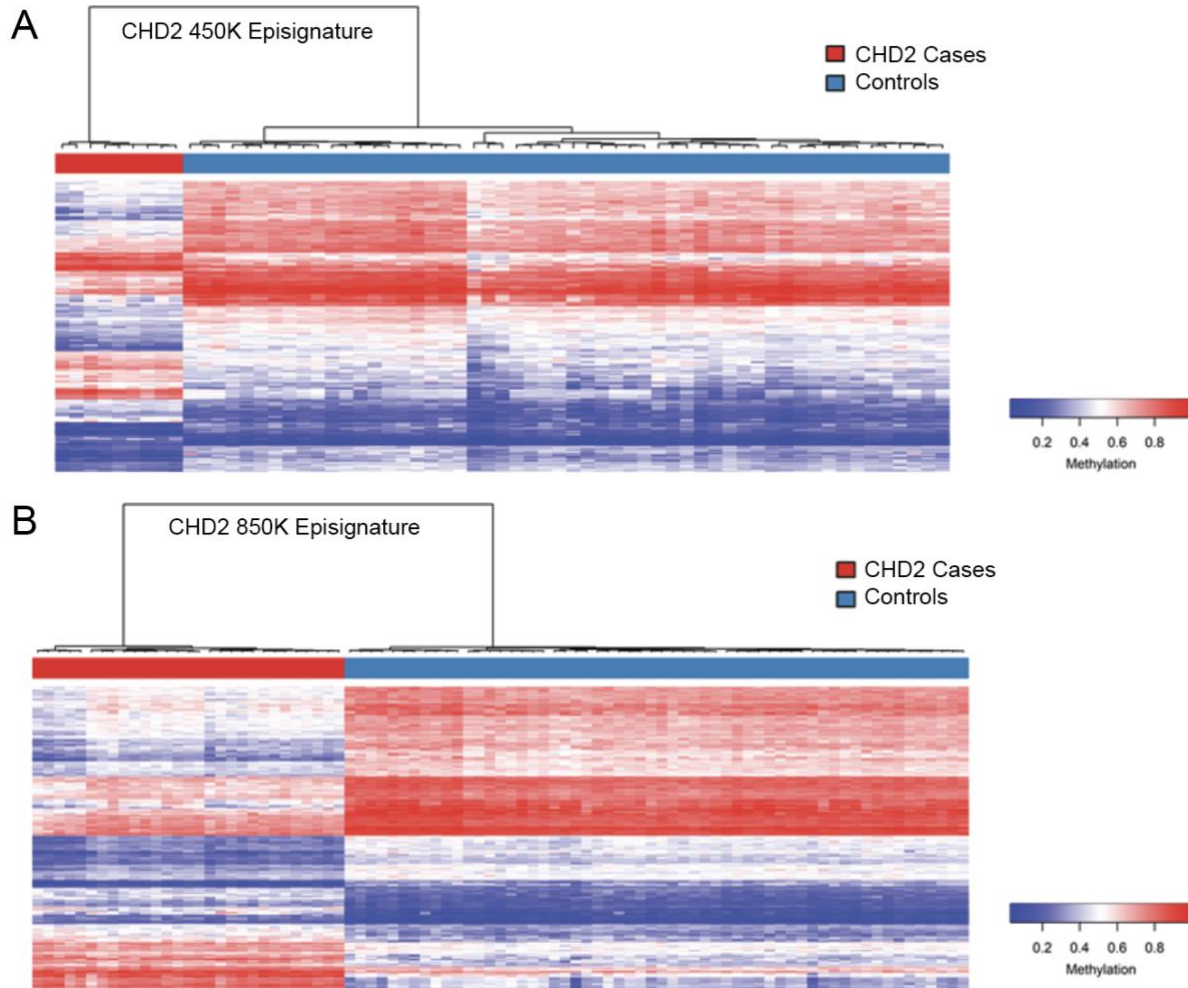

629

630 **Supplementary Figure 24.** Refinement of the *CHD2* Episignature on the 850K array. **A.** Heatmap  
 631 and dendrogram showing clustering using the *CHD2* 450K episignature probes (n=200), derived  
 632 using overlapping 450K/850K probes for n=9 individuals (n=2 450K and n=7 850K) with  
 633 pathogenic variants in *CHD2* against n=54 controls. **B.** Heatmap and dendrogram showing  
 634 clustering using the *CHD2* 850K episignature probes (n=200), derived using n=29 individuals with  
 635 pathogenic variants in *CHD2* against n=58 controls.

636

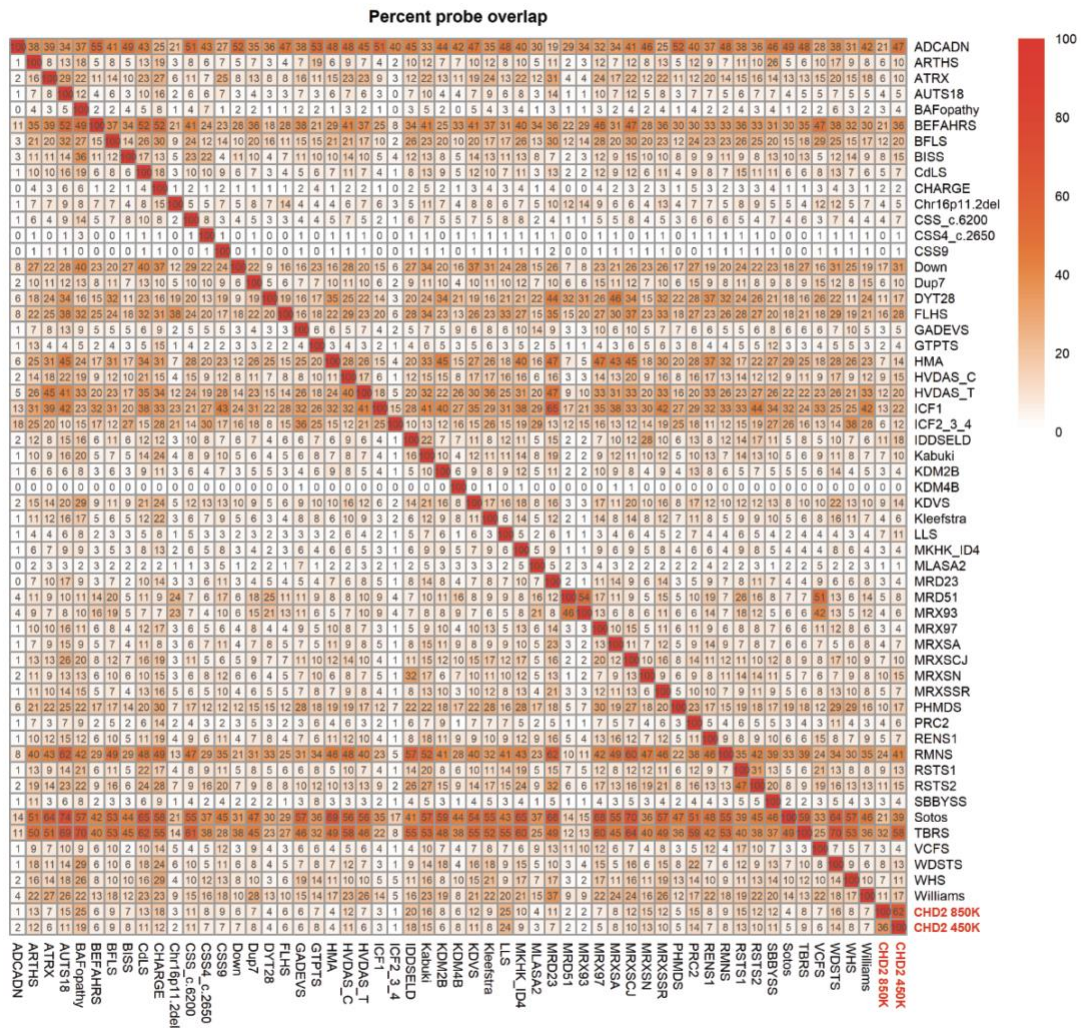

637

638 **Supplementary Figure 25:** Differentially methylated probes found to be shared between multiple  
 639 cohorts. Percent of probes with an adjusted  $p < 0.01$  that are shared between each pair of cohorts  
 640 ( $n = 57$  total cohorts) that was previously investigated<sup>32</sup>. For each pair, the colors indicate the  
 641 percent of the bottom cohort's probes that are also found in the right cohort's probes. The CHD2  
 642 850K episignature shares some portion of probes with every other episignature represented  
 643 except for the 3 episignatures with the smallest number of DMPs (<500 DMPs): KDM4B/KDM4B  
 644 (MIM:619320), CSS9/SOX11 (MIM:615866), and CSS4\_c.2650/SMARCA4, a secondary  
 645 signature for variants near SMARCA4:c.2650, which cluster separately from other  
 646 CSS4/BAFopathy (MIM:614609) samples.

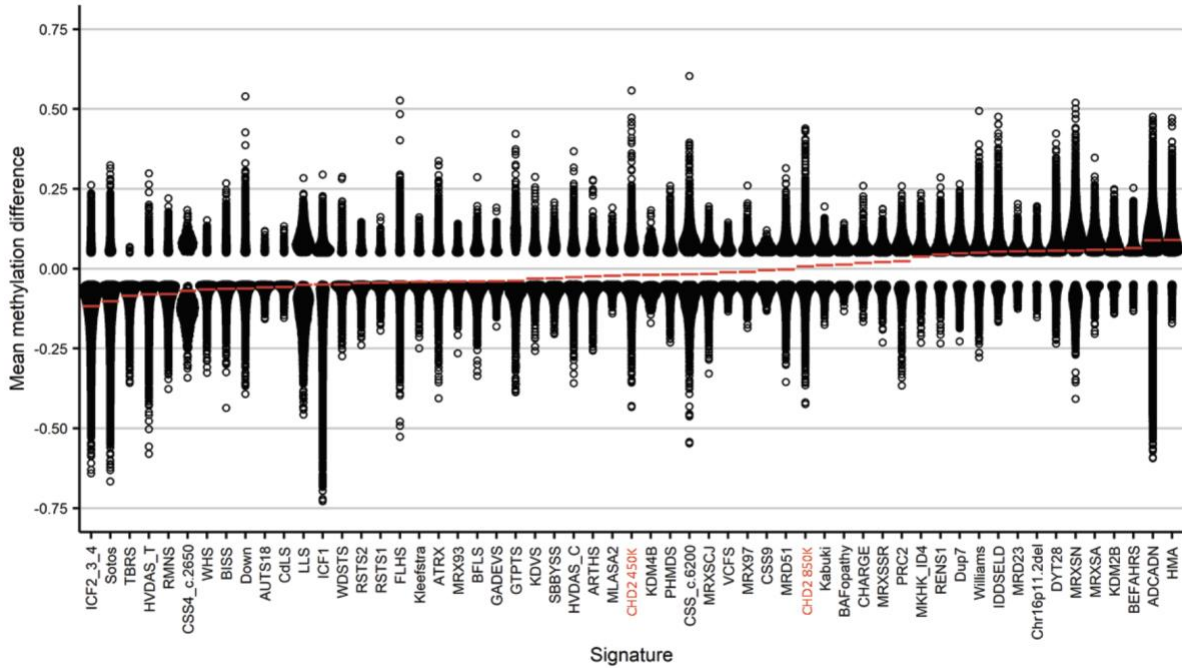

647

648 **Supplementary Figure 26.** Mean Methylation Difference Comparison Across Episignatures.

649 Genome-wide DNA methylation profiles of the 450K and updated 850K CHD2 cohort and 55 other  
 650 EpiSign™ episignatures previously investigated for functional correlational analysis<sup>32</sup>. Global  
 651 methylation differences of all differentially methylated probes (false discovery rate<0.05) for each  
 652 cohort, sorted by mean methylation. Each circle represents 1 probe. Red lines indicate mean  
 653 methylation. The x-axis represents 1 of the 57 episignatures and the y-axis is the mean  
 654 methylation difference.

655

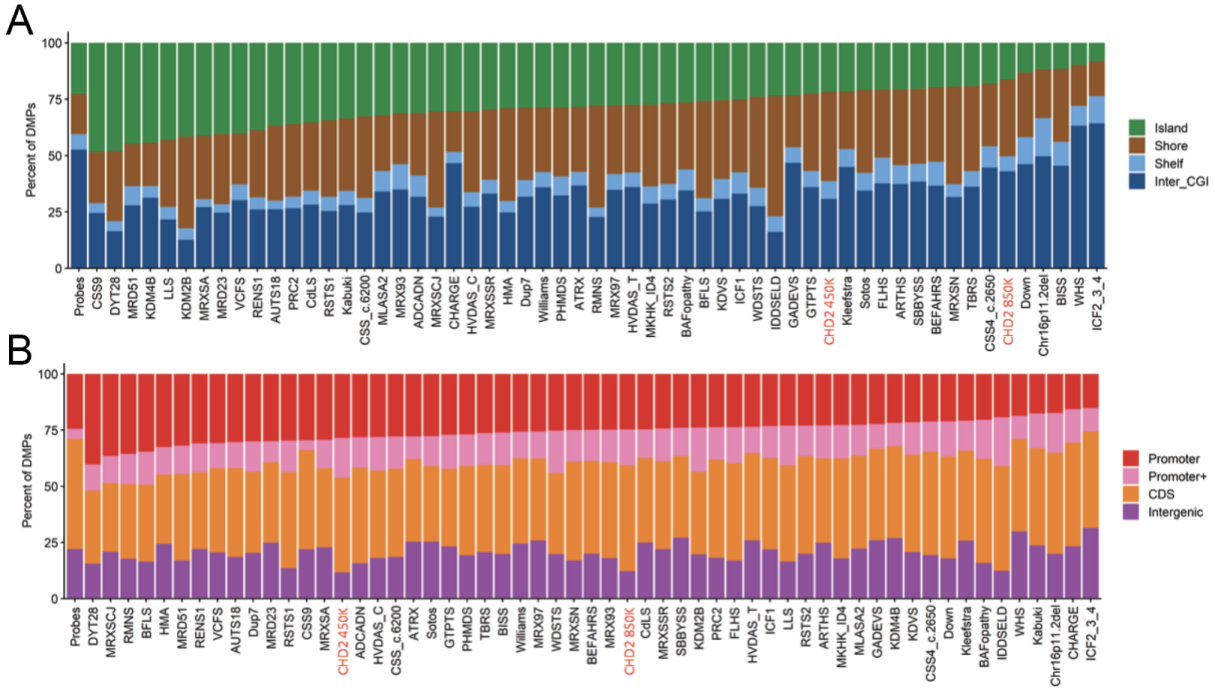

656

657 **Supplementary Figure 27.** Annotation of differentially methylated probes in 450K and 850K  
 658 CHD2 epesignatures and other EpiSign™ epesignatures previously published. Differentially  
 659 methylated probes (DMPs) of CHD2 450K and 850K cohorts (red) and 56 other epesignatures as  
 660 previously investigated<sup>32</sup>. X-axis represents 1 of the 57 epesignatures and the y-axis the  
 661 percentage of DMPs. **A.** DMPs annotated in the context of CpG islands. Island, CpG islands;  
 662 Shore, within 0 to 2 kb of a CpG island boundary; Shelf, within 2 to 4 kb of a CpG island boundary;  
 663 inter-CGI, all other regions in the genome **B.** DMPs annotated in the context of genes. Promoter, 0  
 664 to 1 kb upstream of the TSS; Promoter+, 1 to 5 kb upstream of the TSS; CDS, coding sequence;  
 665 Intergenic, all other regions of the genome. The Probes column in panels A and B represents the  
 666 background distribution determined in a previous study<sup>33</sup> of all array probes after initial filtering  
 667 and used as input for DMP analysis.

668

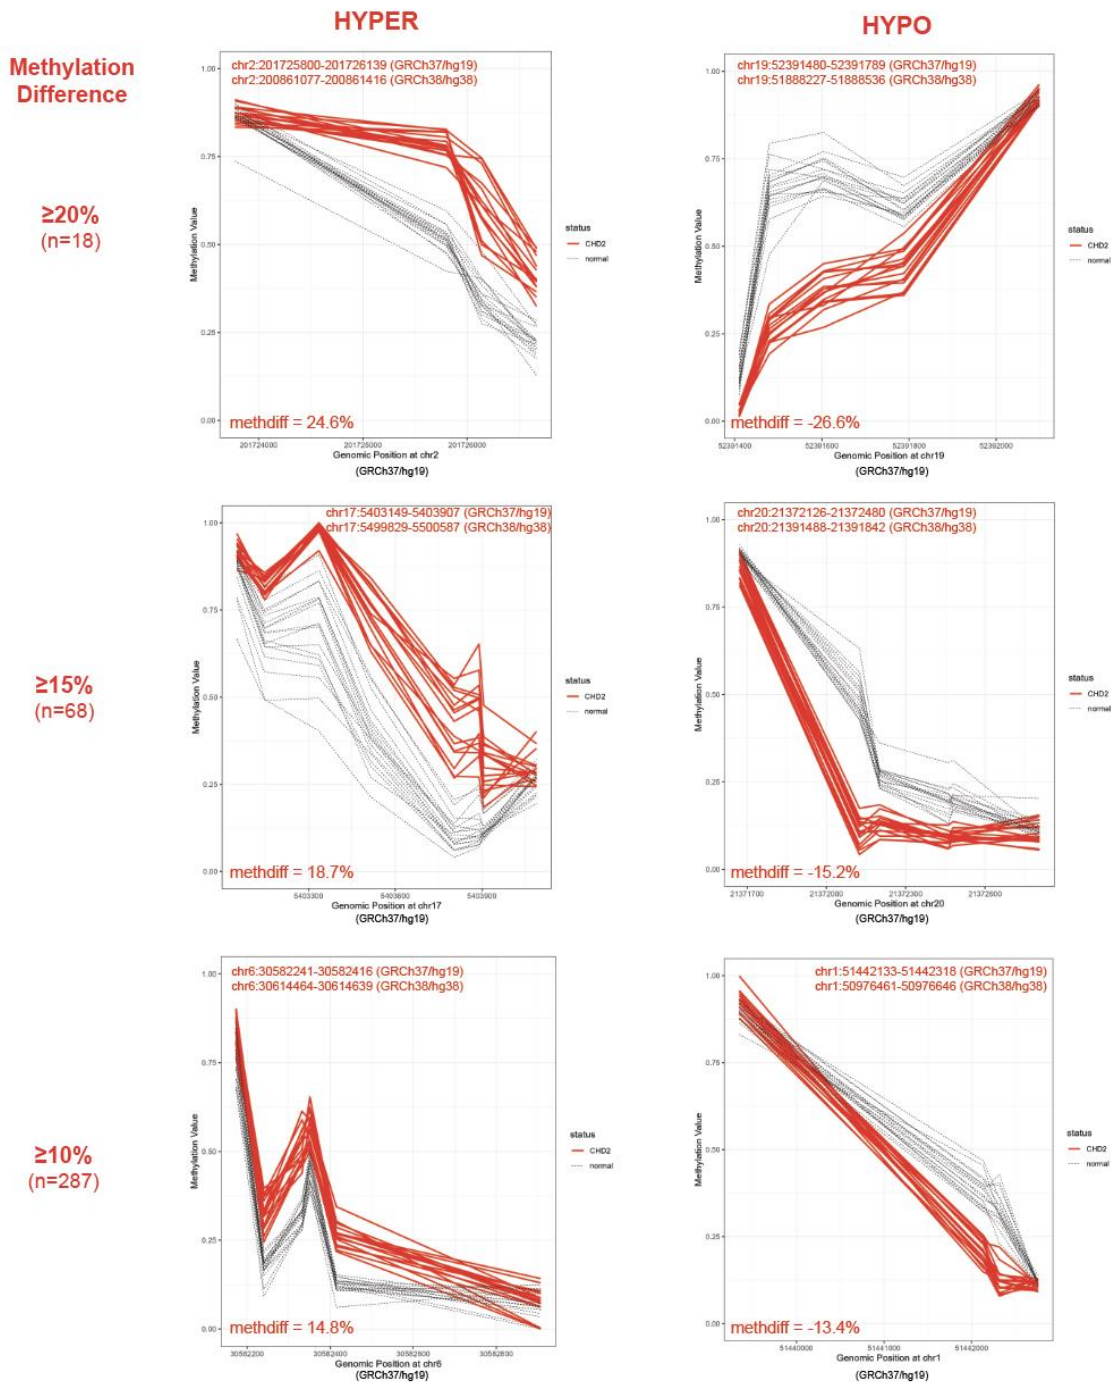

669

670 **Supplementary Figure 28.** Representative *CHD2* DMRs derived on the 850K array. DMRs were

671 called from bumhunter and DMRcate for n=16 individuals with pathogenic variants in *CHD2* vs.

672 n=18 unaffected controls. Final DMR coordinates were considered the overlapping regions of at

673 least 50bp of more. Representative hypermethylated DMR plots (GRCh37/hg19) are shown on

674 the left, and hypomethylated DMR plots are shown on the right. The methylation differences were  
675 considered the average between the two callers and are shown in the DMR plots. The number of  
676 DMRs called at various methylation differences are noted to the left of the plots. A total of 712  
677 DMRs were called with at least a 5% methylation difference between *CHD2* and controls.



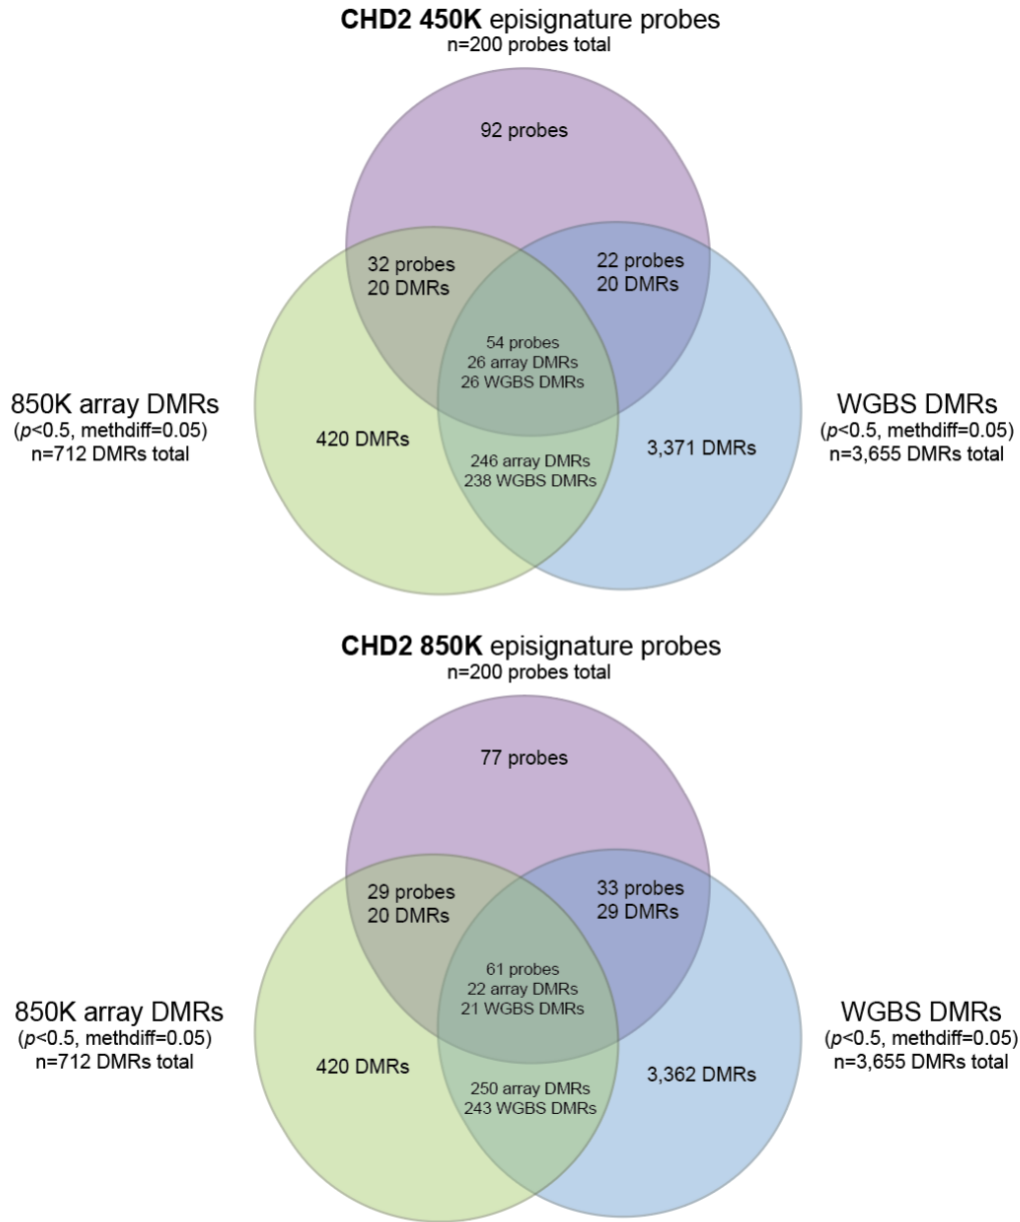

678

679 **Supplementary Figure 29.** Overlap of *CHD2* episignature probes with DMRs called from the  
 680 850K array and WGBS. Venn diagrams showing overlap of 450K *CHD2* episignature (n=200  
 681 probes, top purple) and 850K (n=200 probes, bottom purple) with 850K array DMRs (left green)  
 682 and WGBS DMRs (right blue). See methods for a detailed description of how episignatures and  
 683 DMRs were derived.

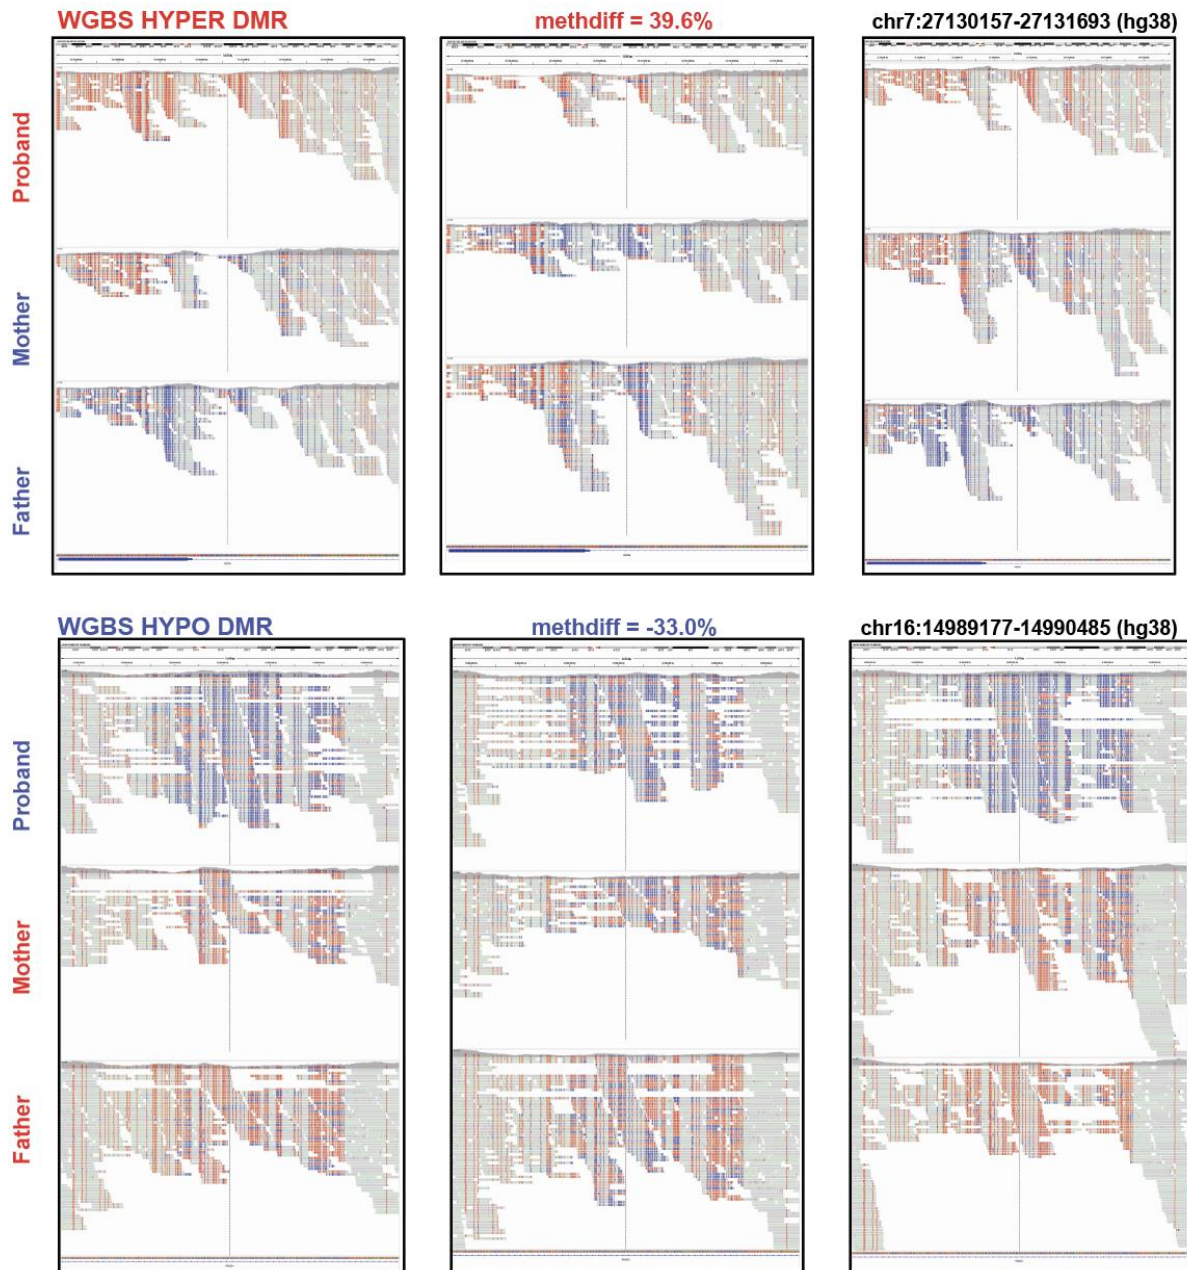

684

685 **Supplementary Figure 30.** Representative *CHD2* DMRs called from WGBS. DMRs were called  
 686 for n=4 individuals with pathogenic variants in *CHD2* vs. n=6 unaffected parents requiring overlap  
 687 from both DSS and DMRcate tools. Two representative DMRs (1 hyper, 1 hypo) are shown in IGV  
 688 for n=3 trios. The proband (top track) is clearly differentially methylated compared to both parents  
 689 (middle and bottom tracks). The center of the plot is marked by a dotted black line.

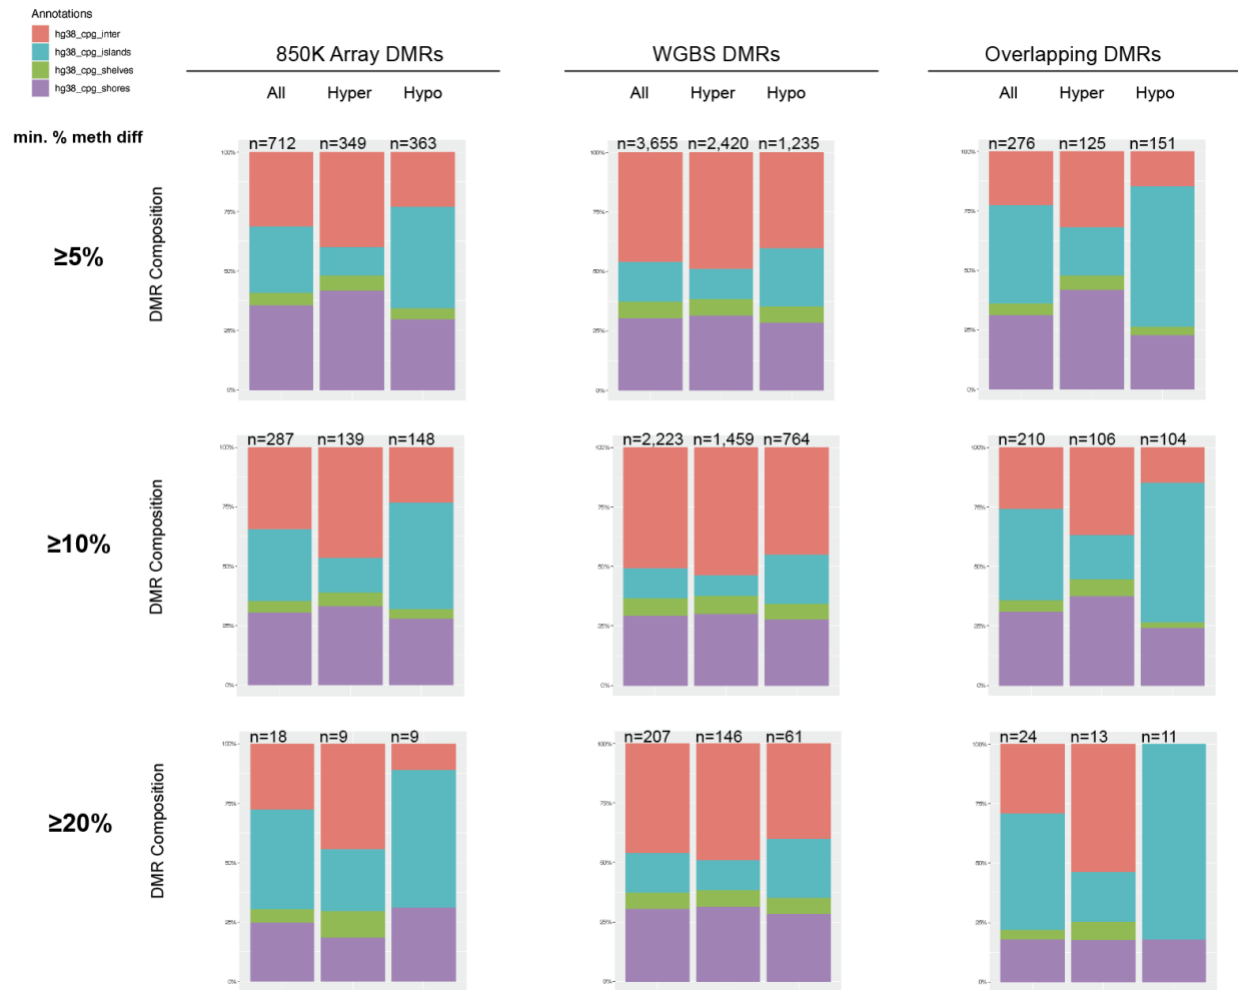

691

692 **Supplementary Figure 31.** Functional annotation of *CHD2* DMRs with CpG descriptions. DMRs693 were called for n=16 *CHD2* vs. n=18 unaffected controls using bumphunter and DMRcate for the694 850K array and n=4 *CHD2* vs. n=6 unaffected controls using DSS and DMRcate for WGBS695 (Methods). DMRs were considered significant if  $p < 0.05$  and the percent methylation difference

696 (% meth diff) was greater than or equal to the cutoffs shown (5%, 10%, 20%). DMR composition

697 by CpG descriptors was calculated as a fraction of the length of each DMR to ensure that a DMR

698 overlapping with multiple descriptors was only counted once. CpG islands are areas of the

699 genome with a high density of CpGs. CpG shores are located within 2Kb on either side of CpG

700 islands. CpG shelves are located within 2Kb of CpG shores, and interCpG islands (interCGI)  
701 covers the rest of the genome.

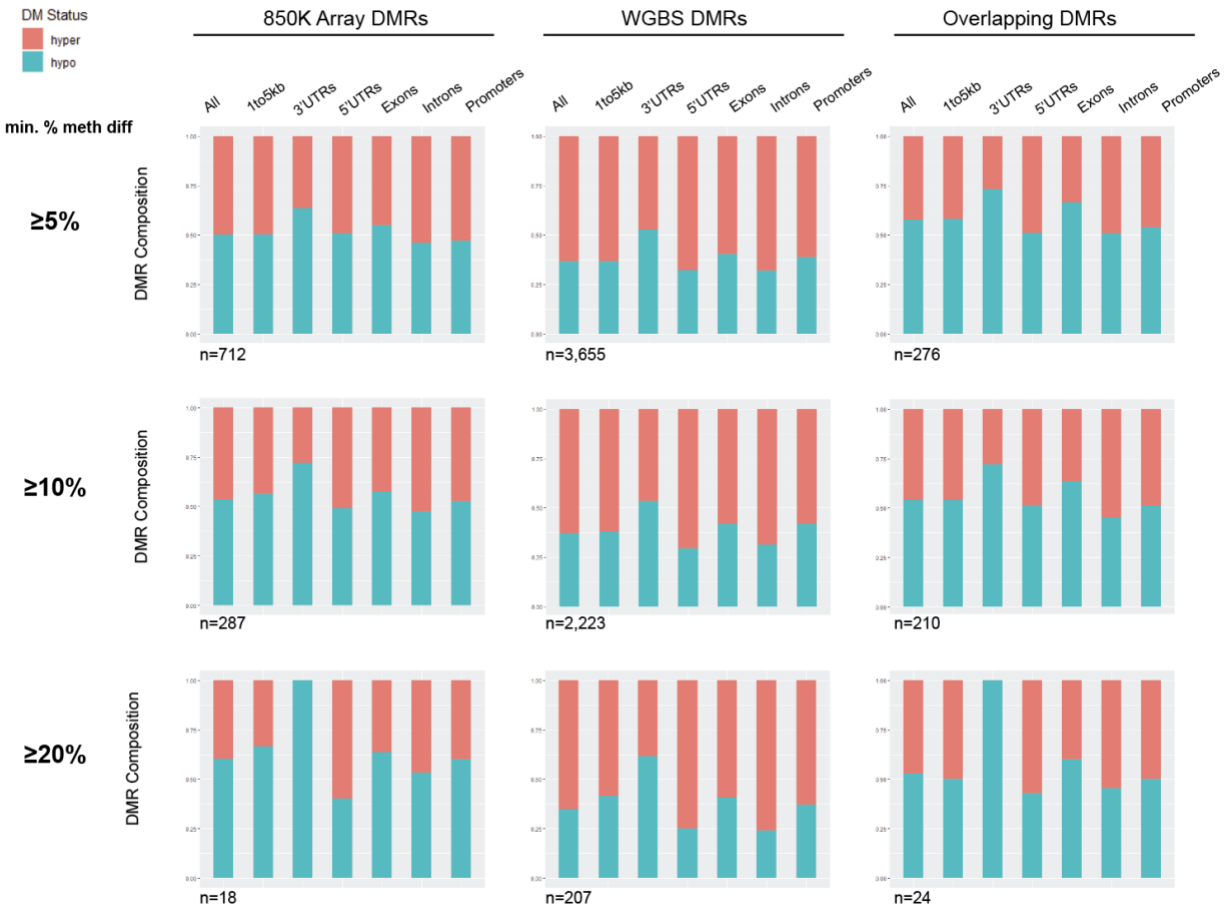

702

703 **Supplementary Figure 32.** Functional annotation of *CHD2* DMRs by gene region. DMRs were

704 called for n=16 *CHD2* vs. n=18 unaffected controls using bumphunter and DMRcate for the 850K

705 array and n=4 *CHD2* vs. n=6 unaffected controls using DSS and DMRcate for WGBS (Methods).

706 DMRs were considered significant if  $p < 0.05$  and the percent methylation difference (% meth diff)

707 was greater than or equal to the cutoffs shown (5%, 10%, 20%). DMR composition by gene region

708 includes 1-5Kb upstream of the TSS (1to5kb), the promoters (<1Kb upstream the TSS), the

709 5'UTRs, exons, introns, and the 3'UTRs. Representation as a fraction across hypermethylated

710 DMRs are shown in pink and hypomethylated DMRs are shown in blue.

711

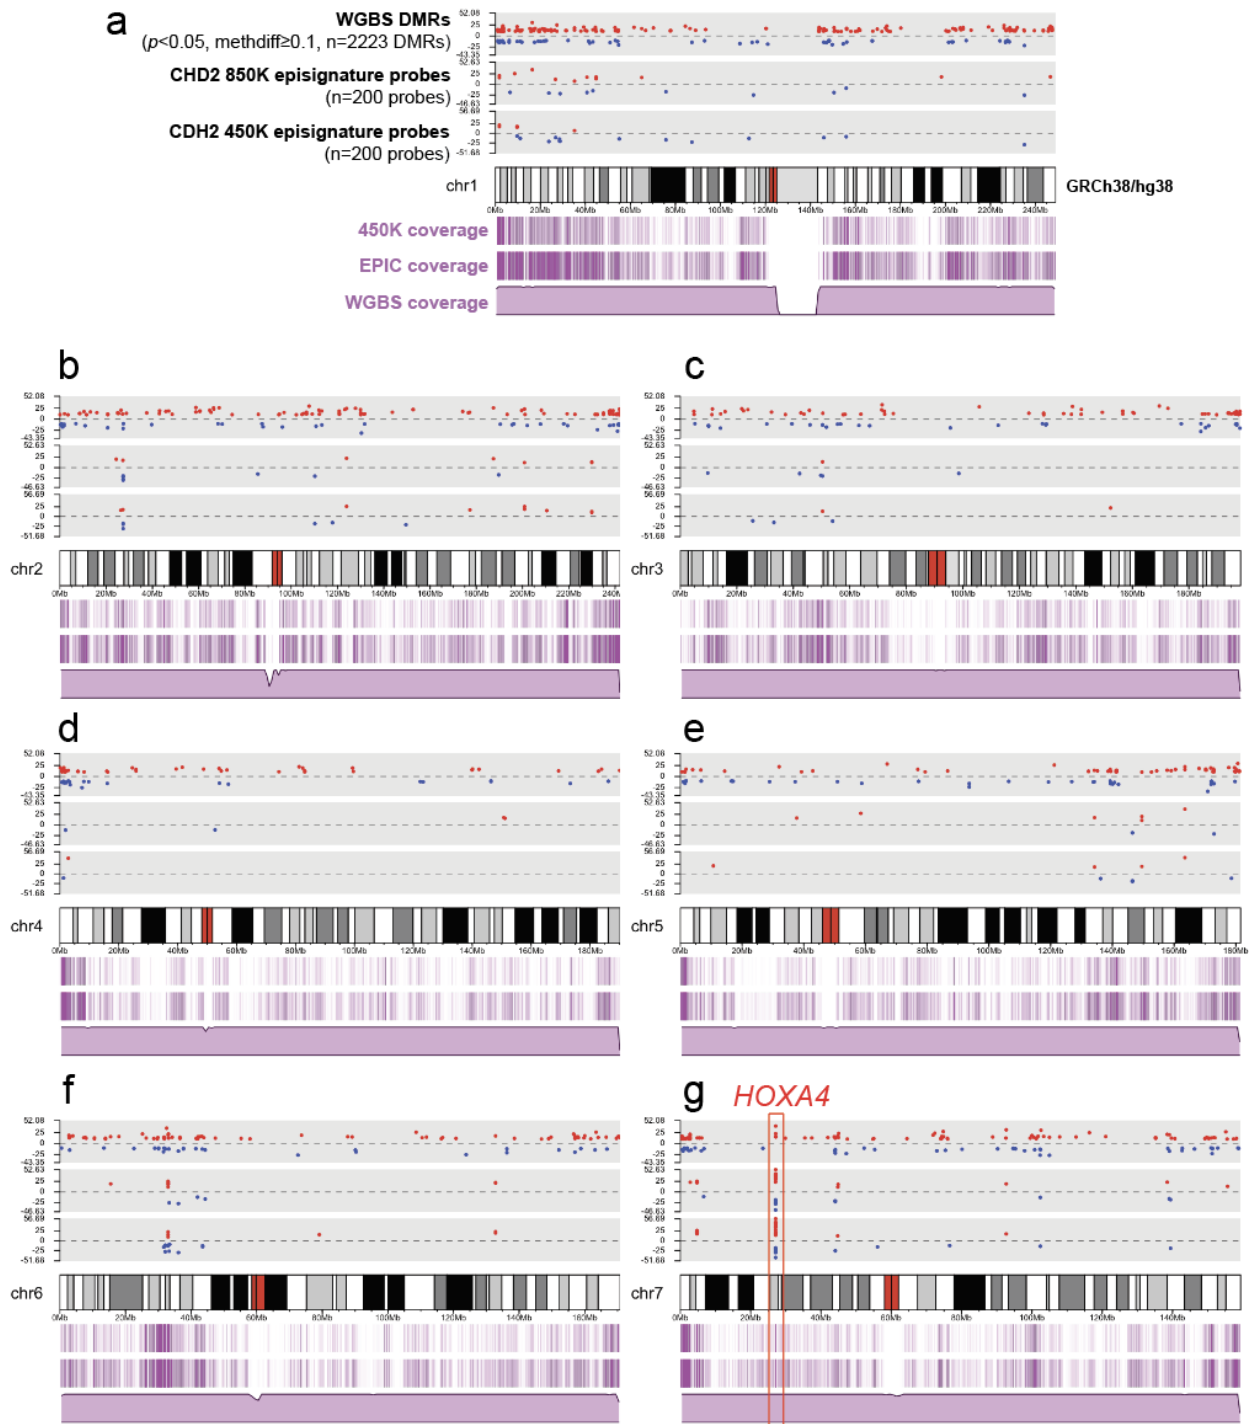

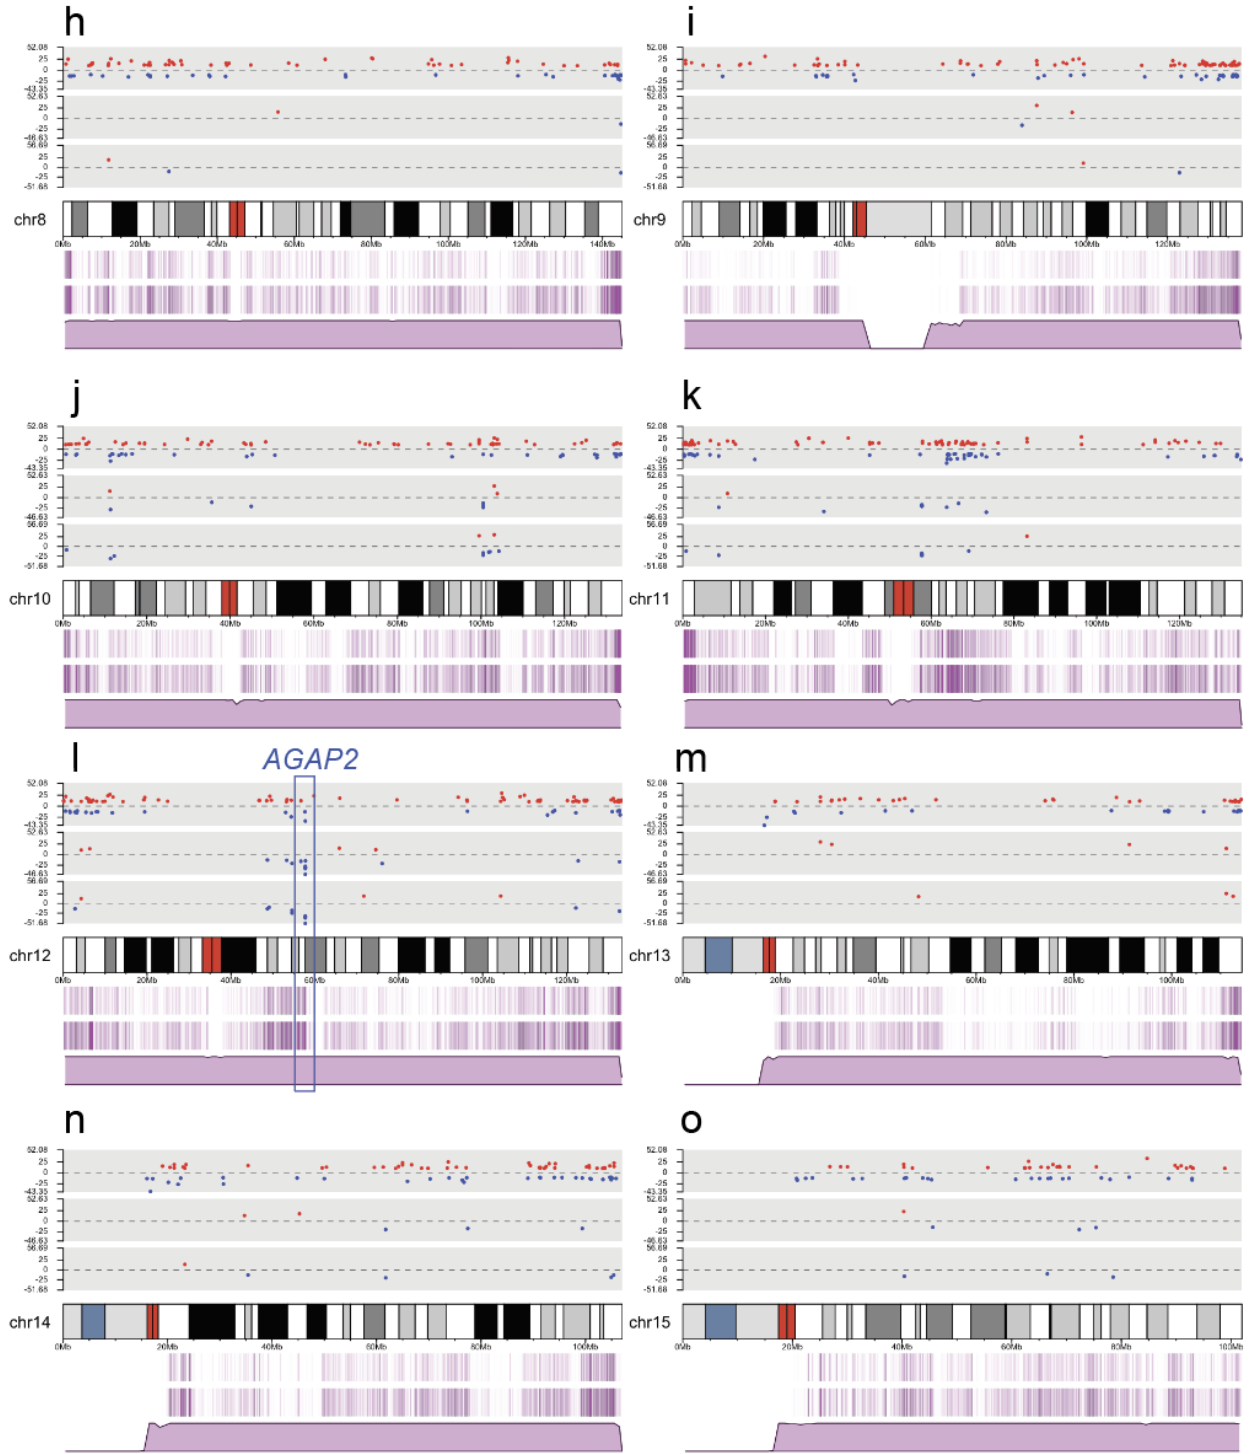

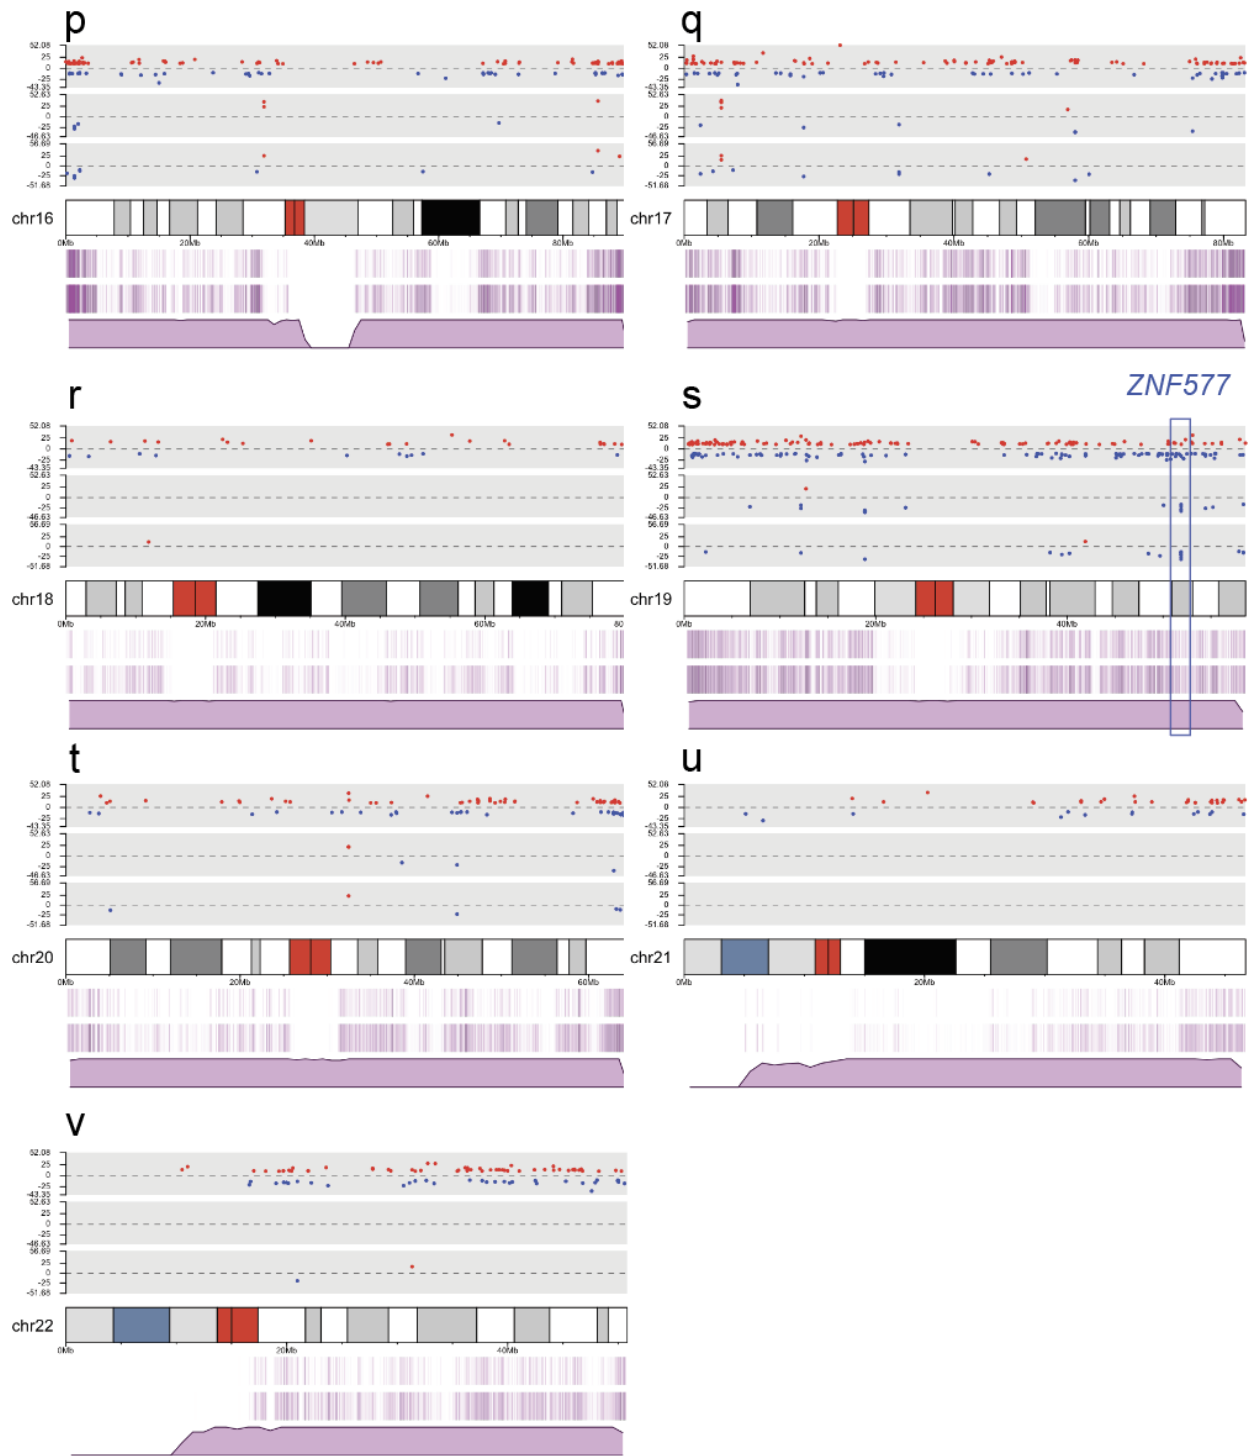

714

715 **Supplementary Figure 33.** Linear karyotype plots representing *CHD2* episignature probes

716 overlapping with DMRs called from n=4 *CHD2* vs. n=6 unaffected controls using WGBS.

717 Individual karyotype tracks for chr1-22 (a-v) where three grey tracks (upper panel above



718 chromosome) depict individual red (hyper) or blue (hypo) dots for WGBS DMRs (upper), CHD2  
719 850K episignature probes (middle) and CHD2 450K episignature probes (lower). The scale  
720 denotes the methylation difference between *CHD2* relative to controls. Three purple tracks (lower  
721 panel below chromosome) depict the coverage for the 450K array probes (lines, upper), 850K  
722 array probes (lines, middle), and WGBS reads (distribution, lower). The coverage track for the  
723 WGBS is taken from a representative sample after inspecting the average coverage values across  
724 all the samples. Examples of where episignature probes form a cluster and overlap with a DMR  
725 are boxed in red (hyper) and blue (hypo) for *HOXA4*, *AGAP2*, and *ZNF577*.  
726

727

**Full List of Author Abbreviations**

728 Christy W. LaFlamme C.W.L.

729 Cassandra Rastin C.R.

730 Soham Sengupta S.S.

731 Helen E. Pennington H.E.P.

732 Sophie J. Russ-Hall S.J.R.

733 Amy L. Schneider A.L.S.

734 Emily S. Bonkowski E.S.B.

735 Edith P. Almanza Fuerte E.P.A.

736 Talia J. Allan T.J.A.

737 Miranda Perez-Galey Zalusky M.P.Z.

738 Joy Goffena J.G.

739 Sophia B. Gibson S.B.G.

740 Denis M. Nyaga D.M.N.

741 Nico Lieffering N.L.

742 Malavika Hebbar M.H.

743 Emily V. Walker E.V.W.

744 Daniel Darnell D.D.

745 Scott R. Olsen S.R.O.

746 Pandurang Kolekar P.K.

747 Mohamed Nahdir Djekidel M.N.D.

748 Wojciech Rosikiewicz W.R.

749 Haley McConkey H.M.

750 Jennifer Kerkhof J.K.

|     |                              |        |
|-----|------------------------------|--------|
| 751 | Michael A. Levy              | M.A.L. |
| 752 | Raissa Relator               | R.R.   |
| 753 | Dorit Lev                    | D.L.   |
| 754 | Tally Lerman-Sagie           | T.L.S. |
| 755 | Kristen L. Park              | K.L.P. |
| 756 | Marielle Alders              | M.A.   |
| 757 | Gerarda Cappuccio            | G.C.   |
| 758 | Nicolas Chatron              | N.C.   |
| 759 | Leigh Demain                 | L.D.   |
| 760 | David Genevieve              | D.G.   |
| 761 | Gaetan Lesca                 | G.L.   |
| 762 | Tony Roscioli                | T.R.   |
| 763 | Damien Sanlaville            | D.S.   |
| 764 | Matthew L. Tedder            | M.L.T. |
| 765 | Sachin Gupta                 | S.G.   |
| 766 | Elizabeth A. Jones           | E.A.J. |
| 767 | Monika Weisz-Hubshman        | M.W.H. |
| 768 | Shamika Ketkar               | S.K.   |
| 769 | Hongzheng Dai                | H.D.   |
| 770 | Kim C. Worley                | K.C.W. |
| 771 | Jill A. Rosenfeld            | J.A.R. |
| 772 | Hsiao-Tuan Chao              | H.T.C. |
| 773 | Undiagnosed Diseases Network | UDN    |

|     |                                                           |        |         |
|-----|-----------------------------------------------------------|--------|---------|
| 774 | Geoffrey Neale                                            | G.N.   |         |
| 775 | Gemma L. Carvill                                          | G.L.C. |         |
| 776 | University of Washington Center for Rare Disease Research |        | UW-CRDR |
| 777 | Zhaoming Wang                                             | Z.W.   |         |
| 778 | Samuel F. Berkovic                                        | S.F.B. |         |
| 779 | Lynette G. Sadleir                                        | L.G.S. |         |
| 780 | Danny E. Miller                                           | D.E.M. |         |
| 781 | Ingrid E. Scheffer                                        | I.E.S. |         |
| 782 | Bekim Sadikovic                                           | B.S.   |         |
| 783 | Heather C. Mefford                                        | H.C.M. |         |
| 784 |                                                           |        |         |

785  
786  
787  
788  
789  
790  
791  
792  
793  
794  
795  
796  
797  
798  
799  
800  
801  
802  
803  
804  
805  
806

**Full List of Consortia Members for UW-CRDR and UDN**

**University of Washington Center for Rare Disease Research (UW-CRDR)**

Chia-Lin Wei<sup>1</sup>, Michael J. Bamshad<sup>1,2</sup> and Evan E. Eichler<sup>1,3</sup>

Kailyn Anderson<sup>1</sup>, Peter Anderson<sup>1</sup>, Tamara J. Bacus<sup>1</sup>, Sabrina Best<sup>1</sup>, Elizabeth E. Blue<sup>1</sup>,  
Katherine Brower<sup>1</sup>, Kati J. Buckingham<sup>1</sup>, Brianne Carroll<sup>1</sup>, Silvia Casadei<sup>1</sup>, Jessica X. Chong<sup>1</sup>,  
Nikhita Damaraju<sup>1</sup>, Colleen P. Davis<sup>1</sup>, Christian D. Frazar<sup>1</sup>, Sophia Gibson<sup>1</sup>, Joy Goffena<sup>1</sup>,  
William W. Gordon<sup>1</sup>, Jonas A. Gustafson<sup>1</sup>, William T. Harvey<sup>1</sup>, Martha Horike-Pyne<sup>1</sup>, Jameson  
R. Hurless<sup>1</sup>, Caitlin Jacques<sup>1</sup>, Gail P. Jarvik<sup>1</sup>, Eric Johanson<sup>1</sup>, J. Thomas Kolar<sup>1</sup>, Xiaomeng Liu<sup>1</sup>,  
Colby T. Marvin<sup>1</sup>, Sean McGee<sup>1</sup>, Holli Meyers<sup>1</sup>, Heather Mefford<sup>4</sup>, Danny E. Miller<sup>1,2</sup>, Patrick M.  
Nielsen<sup>1</sup>, Karynne Patterson<sup>1</sup>, Aparna Radhakrishnan<sup>1</sup>, Matthew A. Richardson<sup>1</sup>, Erica L. Ryke<sup>1</sup>,  
Aliya Sarkytbayeva<sup>1</sup>, Tristan Shaffer<sup>1</sup>, Kathryn M. Shively<sup>1</sup>, Olivia M. Sommers<sup>1</sup>, Sophie H.R.  
Storz<sup>1</sup>, Joshua D. Smith<sup>1</sup>, Lea M. Starita<sup>1</sup>, Monica Tackett<sup>1</sup>, Sydney A. Ward<sup>1</sup>, Jeffrey M. Weiss<sup>1</sup>,  
Qian Yi<sup>1</sup>, and Miranda P.G. Zalusky<sup>1</sup>.

<sup>1</sup>University of Washington

<sup>2</sup>Seattle Children's Hospital

<sup>3</sup>Howard Hughes Medical Institute

<sup>4</sup>St. Jude Children's Research Hospital

| <b><u>Members of the Undiagnosed Diseases Network (Version: 6.3.2024)</u></b> |                    |                                |
|-------------------------------------------------------------------------------|--------------------|--------------------------------|
| <b>Full Name</b>                                                              | <b>Affiliation</b> | <b>Email</b>                   |
| Aaron Quinlan                                                                 | University of Utah | aquinlan@genetics.utah.edu     |
| Adeline Vanderver                                                             | CHOP               | vandervera@chop.edu            |
| Adriana Rebelo                                                                | Miami              | arebelo@med.miami.edu          |
| Aimee Allworth                                                                | PNW                | allwoa@uw.edu                  |
| Alan H. Beggs                                                                 | Harvard            | beggs@enders.tch.harvard.edu   |
| Alden Huang                                                                   | UCLA               | AYHuang@mednet.ucla.edu        |
| Alex Paul                                                                     | WUSTL Clinical     | alex.paul@wustl.edu            |
| Ali Al-Beshri                                                                 | UAB                | asabeshri@uabmc.edu            |
| Allyn McConkie-Rosell                                                         | Duke               | allyn.mcconkie@duke.edu        |
| Alyssa A. Tran                                                                | BCM Clinical       | alyssat@bcm.edu                |
| Andrea Gropman                                                                | NIH UDP            | agropman@childrensnational.org |
| Andrew B. Crouse                                                              | UAB DMCC           | acrouse@uab.edu                |
| Andrew Stergachis                                                             | PNW                | absterga@uw.edu                |
| Anita Beck                                                                    | PNW                | aebeck@uw.edu                  |
| Anna Hurst                                                                    | UAB                | acehurst@uab.edu               |
| Anna Raper                                                                    | CHOP/UPenn         | rapera@pennmedicine.upenn.edu  |

|                                 |                    |                                          |
|---------------------------------|--------------------|------------------------------------------|
| Anne Hing                       | PNW                | anne.hing@seattlechildrens.org           |
| Arjun Tarakad                   | BCM Clinical       | tarakad@bcm.edu                          |
| Ashley Andrews                  | University of Utah | ashley.andrews@hsc.utah.edu              |
| Ashley McMinn                   | Vanderbilt         | ashley.mcminn@vumc.org                   |
| Ashok Balasubramanyam           | BCM Clinical       | ashokb@bcm.edu                           |
| AudreyStephannie C.<br>Maghiro  | Harvard DMCC       | audreystephannie_maghiro@hms.harvard.edu |
| Barbara N. Pusey<br>Swerdzewski | NIH UDP            | barbara.pusey@nih.gov                    |
| Ben Afzali                      | NIH UDP, NHGRI     | ben.afzali@nih.gov                       |
| Ben Solomon                     | NIH UDP, NHGRI     | solomonb@mail.nih.gov                    |
| Beth A. Martin                  | Stanford           | martinb@stanford.edu                     |
| Breanna Mitchell                | Mayo Clinic        | Mitchell.Breanna@mayo.edu                |
| Brendan C. Lanpher              | Mayo Clinic        | lanpher.brendan@mayo.edu                 |
| Brendan H. Lee                  | BCM Clinical       | blee@bcm.edu                             |
| Brent L. Fogel                  | UCLA               | bfogel@ucla.edu                          |
| Brett H. Graham                 | IU                 | <u>bregraha@iu.edu</u>                   |
| Brian Corner                    | Vanderbilt         | brian.corner@vumc.org                    |
| Bruce Korf                      | UAB                | bkorf@uab.uabmc.edu                      |
| Calum A. MacRae                 | Harvard            | camacrae@bics.bwh.harvard.edu            |

|                    |                    |                                   |
|--------------------|--------------------|-----------------------------------|
| Camilo Toro        | NIH UDP            | toroc@mail.nih.gov                |
| Cara Skraban       | CHOP               | skrabanc@chop.edu                 |
| Carlos A. Bacino   | BCM Clinical       | cbacino@bcm.edu                   |
| Carson A. Smith    | Miami              | carsonsmith@med.miami.edu         |
| Cecilia Esteves    | Harvard DMCC       | cecilia_esteves@hms.harvard.edu   |
| Changrui Xiao      | UCI/CHOC           | changrx@hs.uci.edu                |
| Chloe M. Reuter    | Stanford           | creuter@stanfordhealthcare.org    |
| Christina Lam      | PNW                | ctlam2@uw.edu                     |
| Christine M. Eng   | BCM Sequencing     | ceng@bcm.edu                      |
| Claire Henchcliffe | UCI/CHOC           | chenchcl@hs.uci.edu               |
| Colleen E. Wahl    | NIH UDP            | colleen.wahl@nih.gov              |
| Corrine K. Welt    | University of Utah | cwelt@u2m2.utah.edu               |
| Cynthia J. Tift    | NIH UDP, NHGRI     | ctift@nih.gov                     |
| Dana Kiley         | WUSTL Clinical     | dana.kiley@wustl.edu              |
| Daniel Doherty     | PNW                | ddoher@uw.edu                     |
| Daniel J. Rader    | CHOP/UPenn         | rader@penncmedicine.upenn.edu     |
| Daniel Wegner      | WUSTL Clinical     | danieljwegner@wustl.edu           |
| Danny Miller       | PNW                | Danny.Miller@seattlechildrens.org |
| Daryl A. Scott     | BCM Clinical       | dscott@bcm.edu                    |



|                     |                    |                                    |
|---------------------|--------------------|------------------------------------|
| Dave Viskochil      | University of Utah | dave.viskochil@hsc.utah.edu        |
| David A. Sweetser   | Harvard            | dsweetser@partners.org             |
| David R. Adams      | NIH UDP, NHGRI     | david.adams@nih.gov                |
| Dawn Earl           | PNW                | dawn.earl@seattlechildrens.org     |
| Deborah Barbouth    | Miami              | dbarbouth@miami.edu                |
| Deborah Krakow      | UCLA               | dkrakow@mednet.ucla.edu            |
| Deepak A. Rao       | Harvard            | darao@bwh.harvard.edu              |
| Devin Oglesbee      | Mayo Clinic        | oglesbee.devin@mayo.edu            |
| Devon Bonner        | Stanford           | devonbonner@stanfordhealthcare.org |
| Donna Novacic       | NIH UDP            | donna.novacic@nih.gov              |
| Dustin Baldrige     | WUSTL MOSC         | dbaldri@wustl.edu                  |
| Edward Behrens      | CHOP               | behrens@chop.edu                   |
| Edwin K. Silverman  | Harvard            | ed.silverman@channing.harvard.edu  |
| Elaine Seto         | BCM Clinical       | eseto@bcm.edu                      |
| Elijah Kravets      | Stanford           | ekravets@stanford.edu              |
| Elizabeth A. Burke  | NIH UDP, NHGRI     | elizabeth.burke2@nih.gov           |
| Elizabeth Blue      | PNW                | em27@uw.edu                        |
| Elizabeth L. Fieg   | Harvard            | efieg@bwh.harvard.edu              |
| Elizabeth Rosenthal | PNW                | erosen@uw.edu                      |

|                          |                    |                                                      |
|--------------------------|--------------------|------------------------------------------------------|
| Ellen F. Macnamara       | NIH UDP            | ellen.macnamara@nih.gov                              |
| Elsa Balton              | PNW                | ebalton@medicine.washington.edu                      |
| Emilie D. Douine         | UCLA               | edouine@mednet.ucla.edu                              |
| Emily Glanton            | Harvard DMCC       | Emily_Glanton@hms.harvard.edu                        |
| Emily Shelkowitz         | PNW                |                                                      |
| Eric Allenspach          | PNW                | eric.allenspach@seattlechildrens.org                 |
| Eric Klee                | Mayo Clinic        | klee.eric@mayo.edu                                   |
| Eric Vilain              | UCI/CHOC           | evilain@hs.uci.edu                                   |
| Erin Baldwin             | University of Utah | erin.baldwin@hsc.utah.edu                            |
| Erin Conboy              | IU                 | <a href="mailto:econboy@iu.edu">econboy@iu.edu</a>   |
| Erin McRoy               | WUSTL Clinical     | e.hediger@wustl.edu                                  |
| Esteban C. Dell'Angelica | UCLA               | edellangelica@mednet.ucla.edu                        |
| Euan A. Ashley           | Stanford DMCC      | Euan@stanford.edu                                    |
| F. Sessions Cole         | WUSTL DMCC         | fcole@wustl.edu                                      |
| Filippo Pinto e Vairo    | Mayo Clinic        | vairo.filippo@mayo.edu                               |
| Frances High             | Harvard            | fhigh@partners.org                                   |
| Francesco Vetrini        | IU                 | <a href="mailto:fvetrini@iu.edu">fvetrini@iu.edu</a> |
| Francis Rossignol        | NIH UDP, NHGRI     | francis.rossignol@nih.gov                            |
| Fuki M. Hisama           | PNW                | fmh2@uw.edu                                          |

|                 |                            |                                      |
|-----------------|----------------------------|--------------------------------------|
| Gabor Marth     | University of Utah<br>DMCC | gmarth@genetics.utah.edu             |
| Gail P. Jarvik  | PNW                        | pair@uw.edu                          |
| Gary D. Clark   | BCM Clinical               | gdclark@texaschildrens.org           |
| George Carvalho | UCLA                       | GCarvalhoNeto@mednet.ucla.edu        |
| Gerard T. Berry | Harvard                    | gerard.berry@childrens.harvard.edu   |
| Ghayda Mirzaa   | PNW                        | gmirzaa@uw.edu                       |
| Gill Bejerano   | Stanford                   | bejerano@stanford.edu                |
| Giorgio Sirugo  | CHOP/UPenn                 | Giorgio.Sirugo@penmedicine.upenn.edu |
| Gonench Kilich  | CHOP                       | kilichg@chop.edu                     |
| Guney Bademci   | Miami                      | g.bademci@miami.edu                  |
| Heidi Wood      | NIH UDP, NHGRI             | heidi.wood@nih.gov                   |
| Herman Taylor   | Morehouse DMCC             | htaylor@msm.edu                      |
| Holly K. Tabor  | Stanford                   | hktabor@stanford.edu                 |
| Hongzheng Dai   | BCM Clinical               | Hongzheng.Dai@bcm.edu                |
| Hsiao-Tuan Chao | BCM Clinical               | hc140077@bcm.edu                     |
| Hugo J. Bellen  | BCM MOSC                   | hbellen@bcm.edu                      |
| Ian Glass       | PNW                        | ianglass@uw.edu                      |
| Ian R. Lanza    | Mayo Clinic                | lanza.ian@mayo.edu                   |
| Ingrid A. Holm  | Harvard                    | ingrid.holm@childrens.harvard.edu    |

|                      |                    |                                       |
|----------------------|--------------------|---------------------------------------|
| Isaac S. Kohane      | Harvard DMCC       | isaac_kohane@hms.harvard.edu          |
| Ivan Chinn           | BCM Clinical       | Ivan.Chinn@bcm.edu                    |
| J. Carl Pallais      | Harvard            | Juan.Pallais@mgh.harvard.edu          |
| Jacinda B. Sampson   | Stanford           | jacindas@stanford.edu                 |
| James P. Orengo      | BCM Clinical       | james.orengo@bcm.edu                  |
| Jason Hom            | Stanford           | jasonhom@stanford.edu                 |
| Jennefer N. Kohler   | Stanford           | jkohler@stanfordhealthcare.org        |
| Jennifer E. Posey    | BCM Clinical       | Jennifer.Posey@bcm.edu                |
| Jennifer Wambach     | WUSTL Clinical     | wambachj@wustl.edu                    |
| Jessica Douglas      | Harvard            | Jessica.Douglas@childrens.harvard.edu |
| Jiayu Fu             | NIH UDP, NHGRI     | fuj6@mail.nih.gov                     |
| Jill A. Rosenfeld    | BCM Clinical       | mokry@bcm.edu                         |
| Jimann Shin          | WUSTL MOSC         | shinji@wustl.edu                      |
| Jimmy Bennett        | PNW                | jtben@uw.edu                          |
| Joan M. Stoler       | Harvard            | joan.stoler@childrens.harvard.edu     |
| Joanna M. Gonzalez   | Miami              | jmg442@miami.edu                      |
| John A. Phillips III | Vanderbilt         | John.a.phillips@vumc.org              |
| John Carey           | University of Utah | john.carey@hsc.utah.edu               |
| John J. Mulvihill    | NIH UDP            | johmulvihill@gmail.com                |

|                           |                    |                                                                                              |
|---------------------------|--------------------|----------------------------------------------------------------------------------------------|
| Joie Davis                | NIH UDP, NHGRI     | <a href="mailto:jdavis@niaid.nih.gov">jdavis@niaid.nih.gov</a>                               |
| Jonathan A. Bernstein     | Stanford           | <a href="mailto:Jon.Bernstein@stanford.edu">Jon.Bernstein@stanford.edu</a>                   |
| Jordan Whitlock           | UAB DMCC           | <a href="mailto:jbarham3@uab.edu">jbarham3@uab.edu</a>                                       |
| Jose Abdenur              | UCI/CHOC           | <a href="mailto:JAbdenur@choc.org">JAbdenur@choc.org</a>                                     |
| Joseph Loscalzo           | Harvard            | <a href="mailto:jloscalzo@partners.org">jloscalzo@partners.org</a>                           |
| Joy D. Cogan              | Vanderbilt         | <a href="mailto:joy.cogan@vumc.org">joy.cogan@vumc.org</a>                                   |
| Julian A. Martínez-Agosto | UCLA               | <a href="mailto:julianmartinez@mednet.ucla.edu">julianmartinez@mednet.ucla.edu</a>           |
| Justin Alvey              | University of Utah | <a href="mailto:justin.alvey@hsc.utah.edu">justin.alvey@hsc.utah.edu</a>                     |
| Kahlen Darr               | Mayo Clinic        | <a href="mailto:Darr.Kahlen@mayo.edu">Darr.Kahlen@mayo.edu</a>                               |
| Kaitlin Callaway          | UAB                | <a href="mailto:kcallaway@uabmc.edu">kcallaway@uabmc.edu</a>                                 |
| Kathleen A. Leppig        | PNW                | <a href="mailto:leppig@uw.edu">leppig@uw.edu</a>                                             |
| Kathleen Sullivan         | CHOP               | <a href="mailto:sullivank@chop.edu">sullivank@chop.edu</a>                                   |
| Kathy Sisco               | WUSTL Clinical     | <a href="mailto:siscok@wustl.edu">siscok@wustl.edu</a>                                       |
| Kathryn Singh             | UCI/CHOC           | <a href="mailto:kesingh@hs.uci.edu">kesingh@hs.uci.edu</a>                                   |
| Katrina Dipple            | PNW                | <a href="mailto:katrina.dipple@seattlechildrens.org">katrina.dipple@seattlechildrens.org</a> |
| Kayla M. Treat            | IU                 | <a href="mailto:ktreat@iuhealth.org">ktreat@iuhealth.org</a>                                 |
| Kelly Hassey              | CHOP               | <a href="mailto:hasseyk@chop.edu">hasseyk@chop.edu</a>                                       |
| Kelly Schoch              | Duke               | <a href="mailto:kelly.schoch@duke.edu">kelly.schoch@duke.edu</a>                             |
| Kevin S. Smith            | Stanford           | <a href="mailto:kssmith@stanford.edu">kssmith@stanford.edu</a>                               |

|                         |                    |                                                                                          |
|-------------------------|--------------------|------------------------------------------------------------------------------------------|
| Khurram Liaqat          | IU                 | <a href="mailto:kliqat@iu.edu">kliqat@iu.edu</a>                                         |
| Kim Worley              | BCM Clinical       | <a href="mailto:kworley@bcm.edu">kworley@bcm.edu</a>                                     |
| Kimberly Ezell          | Vanderbilt         | <a href="mailto:kimberly.ezell@vumc.org">kimberly.ezell@vumc.org</a>                     |
| Kimberly LeBlanc        | Harvard DMCC       | <a href="mailto:kimberly_leblanc@hms.harvard.edu">kimberly_leblanc@hms.harvard.edu</a>   |
| Kumarie Latchman        | Miami              | <a href="mailto:kxl604@med.miami.edu">kxl604@med.miami.edu</a>                           |
| Lance H. Rodan          | Harvard            | <a href="mailto:lance.rodan@childrens.harvard.edu">lance.rodan@childrens.harvard.edu</a> |
| Laura Pace              | University of Utah | <a href="mailto:laura.pace@hsc.utah.edu">laura.pace@hsc.utah.edu</a>                     |
| Laurel A. Cobban        | Harvard            | <a href="mailto:lcobban@bwh.harvard.edu">lcobban@bwh.harvard.edu</a>                     |
| Lauren C. Briere        | Harvard            | <a href="mailto:lbriere@partners.org">lbriere@partners.org</a>                           |
| Leoyklang Petcharet     | NIH UDP, NHGRI     | <a href="mailto:petcharat.leoyklang@nih.gov">petcharat.leoyklang@nih.gov</a>             |
| LéShon Peart            | Miami              | <a href="mailto:L.peart@med.miami.edu">L.peart@med.miami.edu</a>                         |
| Lili Mantcheva          | IU                 | <a href="mailto:lmantche@iu.edu">lmantche@iu.edu</a>                                     |
| Lilianna Solnica-Krezel | WUSTL MOSC         | <a href="mailto:solnical@wustl.edu">solnical@wustl.edu</a>                               |
| Lindsay C. Burrage      | BCM Clinical       | <a href="mailto:burrage@bcm.edu">burrage@bcm.edu</a>                                     |
| Lindsay Mulvihill       | Mayo Clinic        | <a href="mailto:mulvihill.lindsay@mayo.edu">mulvihill.lindsay@mayo.edu</a>               |
| Lisa Schimmenti         | Mayo Clinic        | <a href="mailto:Schimmenti.Lisa@mayo.edu">Schimmenti.Lisa@mayo.edu</a>                   |
| Lisa T. Emrick          | BCM Clinical       | <a href="mailto:emrick@bcm.edu">emrick@bcm.edu</a>                                       |
| Lorenzo Botto           | University of Utah | <a href="mailto:lorenzo.botto@hsc.utah.edu">lorenzo.botto@hsc.utah.edu</a>               |
| Lorraine Potocki        | BCM Clinical       | <a href="mailto:lpotocki@bcm.edu">lpotocki@bcm.edu</a>                                   |

|                          |                |                                |
|--------------------------|----------------|--------------------------------|
| Lynette Rives            | Vanderbilt     | lynette.c.rives@vumc.org       |
| Lynne A. Wolfe           | NIH UDP, NHGRI | lynne.wolfe@nih.gov            |
| Manish J. Butte          | UCLA           | mbutte@mednet.ucla.edu         |
| Margaret Delgado         | NIH UDP, NHGRI | margaret.delgado@nih.gov       |
| Maria T. Acosta          | NIH UDP        | acostam@nhgri.nih.gov          |
| Marie Morimoto           | NIH UDP, NHGRI | marie.morimoto@nih.gov         |
| Mariko Nakano-Okuno      | UAB DMCC       | marikonk@uab.edu               |
| Mark Wener               | PNW            | wener@uw.edu                   |
| Marla Sabaii             | NIH UDP, NHGRI | marla.sabaii@nih.gov           |
| Martha Horike-Pyne       | PNW            | mpyne@medicine.washington.edu  |
| Martin G. Martin         | UCLA           | mmartin@mednet.ucla.edu        |
| Martin Rodriguez         | UAB            | rodriguez@uabmc.edu            |
| Matthew Coggins          | Harvard        | mcoggins@bwh.harvard.edu       |
| Matthew Might            | UAB DMCC       | might@uab.edu                  |
| Matthew T. Wheeler       | Stanford       | wheelerm@stanford.edu          |
| Maura Ruzhnikov          | Stanford       | ruzhnikov@stanford.edu         |
| MayChristine V. Malicdan | NIH UDP, NHGRI | maychristine.malicdan@nih.gov  |
| Meghan C. Halley         | Stanford       | mhalley@stanford.edu           |
| Melissa Walker           | Harvard        | walker.melissa@mgh.harvard.edu |

|                       |                    |                                 |
|-----------------------|--------------------|---------------------------------|
| Michael Bamshad       | PNW                | mbamshad@uw.edu                 |
| Michael F. Wangler    | BCM MOSC           | mw147467@bcm.edu                |
| Miguel Almalvez       | UCI/CHOC           | malmalve@hs.uci.edu             |
| Mohamad Mikati        | Duke               | mohamad.mikati@duke.edu         |
| Monika Weisz Hubshman | BCM Clinical       | hubshman@bcm.edu                |
| Monte Westerfield     | UO MOSC            | monte@uoneuro.uoregon.edu       |
| Mustafa Tekin         | Miami              | mtekin@miami.edu                |
| Naghmeh Dorrani       | UCLA               | ndorrani@mednet.ucla.edu        |
| Neil H. Parker        | UCLA               | nhparker@mednet.ucla.edu        |
| Neil Hanchard         | NIH UDP, NHGRI     | neil.hanchard@nih.gov           |
| Nicholas Borja        | Miami              | nborja@med.miami.edu            |
| Nicola Longo          | University of Utah | nicola.longo@hsc.utah.edu       |
| Nicole M. Walley      | Duke               | nicole.walley@duke.edu          |
| Nina Movsesyan        | UCI/CHOC           | nmovsesyan@choc.org             |
| Nitsuh K. Dargie      | PNW                | nitsuhk@medicine.washington.edu |
| Oguz Kanca            | BCM MOSC           | Oguz.Kanca@bcm.edu              |
| Orpa Jean-Marie       | NIH UDP, NHGRI     | orpa.jean-marie@nih.gov         |
| Page C. Goddard       | Stanford           | pgoddard@stanford.edu           |
| Paolo Moretti         | University of Utah | paolo.moretti@hsc.utah.edu      |



|                          |                         |                                |
|--------------------------|-------------------------|--------------------------------|
| Patricia A. Ward         | BCM Sequencing          | pward@bcm.edu                  |
| Patricia Dickson         | WUSTL Clinical          | pdickson@wustl.edu             |
| Paul G. Fisher           | Stanford                | pfisher@stanford.edu           |
| Pengfei Liu              | BCM Sequencing          | pliu@baylorgenetics.com        |
| Peter Byers              | PNW                     | pbyers@uw.edu                  |
| Pinar Bayrak-Toydemir    | University of Utah/ARUP | pinar.bayrak-toydemir@arup.com |
| Precilla D'Souza         | NIH UDP                 | precilla.d'souza@nih.gov       |
| Queenie Tan              | Mayo Clinic             | Tan.KhoonGheeQueenie@mayo.edu  |
| Rachel A. Ungar          | Stanford                | raungar@stanford.edu           |
| Rachel Mahoney           | Harvard DMCC            | rachel_mahoney@hms.harvard.edu |
| Ramakrishnan Rajagopalan | CHOP                    | rajagopalanr@chop.edu          |
| Raquel L. Alvarez        | Stanford                | raquela1@stanford.edu          |
| Rebecca C. Spillmann     | Duke                    | rebecca.crimian@duke.edu       |
| Rebecca Ganetzky         | CHOP                    | ganetzkyr@chop.edu             |
| Rebecca Overbury         | University of Utah      | rebecca.overbury@hsc.utah.edu  |
| Rebekah Barrick          | UCI/CHOC                | rebekah.barrick@choc.org       |
| Richard A. Lewis         | BCM Clinical            | rlewis@bcm.edu                 |
| Richard L. Maas          | Harvard                 | maas@genetics.med.harvard.edu  |
| Rizwan Hamid             | Vanderbilt              | rizwan.hamid@vumc.org          |

|                     |                         |                                   |
|---------------------|-------------------------|-----------------------------------|
| Rong Mao            | University of Utah/ARUP | rong.mao@aruplab.com              |
| Ronit Marom         | BCM Clinical            | ronit.marom@bcm.edu               |
| Rosario I. Corona   | UCLA                    | rcoronadelafuente@mednet.ucla.edu |
| Russell Butterfield | University of Utah      | russell.butterfield@hsc.utah.edu  |
| Sam Sheppard        | PNW                     | samshep@uw.edu                    |
| Sanaz Attaripour    | UCI/CHOC                | sattarip@hs.uci.edu               |
| Seema R. Lalani     | BCM Clinical            | seemal@bcm.edu                    |
| Serena Neumann      | Vanderbilt              | serena.neumann@vumc.org           |
| Shamika Ketkar      | BCM Clinical            | ketkar@bcm.edu                    |
| Shamil R. Sunyaev   | Harvard DMCC            | ssunyaev@hms.harvard.edu          |
| Shilpa N. Kobren    | Harvard DMCC            | Shilpa_Kobren@hms.harvard.edu     |
| Shinya Yamamoto     | BCM MOSC                | yamamoto@bcm.edu                  |
| Shirley Sutton      | Stanford                | scsutton@stanford.edu             |
| Shruti Marwaha      | Stanford                | mshruti@stanford.edu              |
| Sirisak Chanprasert | PNW                     | sirisc@uw.edu                     |
| Stanley F. Nelson   | UCLA                    | snelson@ucla.edu                  |
| Stephan Zuchner     | Miami                   | szuchner@miami.edu                |
| Stephanie Bivona    | Miami                   | sab355@miami.edu                  |
| Stephanie M. Ware   | IU                      | <u>stware@iu.edu</u>              |

|                    |                    |                                  |
|--------------------|--------------------|----------------------------------|
| Stephen Pak        | WUSTL MOSC         | stephen.pak@email.wustl.edu      |
| Steven Boyden      | University of Utah | steven.boyden@genetics.utah.edu  |
| Suman Jayadev      | PNW                | sumie@uw.edu                     |
| Surendra Dasari    | Mayo Clinic        | dasari.surendra@mayo.edu         |
| Susan Korrick      | Harvard            | skorrick@bwh.harvard.edu         |
| Suzanne Sandmeyer  | UCI/CHOC           | sbsandme@hs.uci.edu              |
| Tahseen Mozaffar   | UCI/CHOC           | mozaffar@hs.uci.edu              |
| Tammi Skelton      | UAB                | tlskelton@uabmc.edu              |
| Tara Wenger        | PNW                | tara.wenger@seattlechildrens.org |
| Terra R. Coakley   | Stanford           | tcoakley@stanford.edu            |
| Thomas Cassini     | Vanderbilt         | thomas.a.cassini@vumc.org        |
| Thomas J. Nicholas | University of Utah | thomas.nicholas@utah.edu         |
| Timothy Schedl     | WUSTL MOSC         | ts@wustl.edu                     |
| Tiphonie P. Vogel  | BCM Clinical       | tiphonie.vogel@bcm.edu           |
| Vaidehi Jobanputra | Columbia           | vj2004@cumc.columbia.edu         |
| Valerie V. Maduro  | NIH UDP            | vbraden@mail.nih.gov             |
| Vandana Shashi     | Duke               | vandana.shashi@duke.edu          |
| Virginia Sybert    | PNW                | flk01@uw.edu                     |
| Vishnu Cuddapah    | CHOP               | cuddapahv@chop.edu               |

|                    |                |                            |
|--------------------|----------------|----------------------------|
| Wendy Introne      | NIH UDP, NHGRI | wintrone@nhgri.nih.gov     |
| Wendy Raskind      | PNW            | wendyrun@uw.edu            |
| Willa Thorson      | Miami          | wthorson@miami.edu         |
| William A. Gahl    | NIH UDP, NHGRI | gahlw@mail.nih.gov         |
| William E. Byrd    | UAB DMCC       | webyrd@gmail.com           |
| William J. Craigen | BCM Clinical   | wcraigen@bcm.edu           |
| Yan Huang          | NIH UDP, NHGRI | yan.huang@nih.gov          |
| Yigit Karasozen    | UCLA           | Ykarasozen@mednet.ucla.edu |

808

### Supplementary References

- 809 1 Noriega MA, S. A. *Trisomy 13*. (StatPearls Publishing, Updated 2023 Aug 13).
- 810 2 Tsutsumi, M. *et al*. A female patient with retinoblastoma and severe intellectual disability  
811 carrying an X;13 balanced translocation without rearrangement in the RB1 gene: a case  
812 report. *BMC Med Genomics* **12**, 182, doi:10.1186/s12920-019-0640-2 (2019).
- 813 3 Mefford, H. C. *et al*. Rare copy number variants are an important cause of epileptic  
814 encephalopathies. *Ann Neurol* **70**, 974-985, doi:10.1002/ana.22645 (2011).
- 815 4 Winnepeninckx, B. *et al*. CGG-repeat expansion in the DIP2B gene is associated with  
816 the fragile site FRA12A on chromosome 12q13.1. *Am J Hum Genet* **80**, 221-231,  
817 doi:10.1086/510800 (2007).
- 818 5 Singh, R., Scheffer, I. E., Crossland, K. & Berkovic, S. F. Generalized epilepsy with  
819 febrile seizures plus: a common childhood-onset genetic epilepsy syndrome. *Ann Neurol*  
820 **45**, 75-81, doi:10.1002/1531-8249(199901)45:1<75::aid-art13>3.0.co;2-w (1999).
- 821 6 Heron, S. E. *et al*. Genetic variation of CACNA1H in idiopathic generalized epilepsy. *Ann*  
822 *Neurol* **55**, 595-596, doi:10.1002/ana.20028 (2004).
- 823 7 Heron, S. E. *et al*. Extended spectrum of idiopathic generalized epilepsies associated  
824 with CACNA1H functional variants. *Ann Neurol* **62**, 560-568, doi:10.1002/ana.21169  
825 (2007).
- 826 8 Morel Swols D, T. M. KBG Syndrome. *GeneReviews* (1993-2023).
- 827 9 Roston A, G. W. SETD1B-Related Neurodevelopmental Disorder. *GeneReviews* (1993-  
828 2023).
- 829 10 JA., F. TET3-Related Beck-Fahrner Syndrome. . *GeneReviews* (1993-2023).
- 830 11 Stevenson, R. E. *et al*. UBE2A-related X-linked intellectual disability. *Clin Dysmorphol*  
831 **28**, 1-6, doi:10.1097/MCD.000000000000242 (2019).
- 832 12 Schwartz CE, P. A., Kutler MJ. Snyder-Robinson Syndrome. *GeneReviews*® (2020).

833 13 Parkinson Progression Marker, I. The Parkinson Progression Marker Initiative (PPMI).  
834 *Prog Neurobiol* **95**, 629-635, doi:10.1016/j.pneurobio.2011.09.005 (2011).

835 14 Dong, Q. *et al.* Genome-wide association studies identify novel genetic loci for  
836 epigenetic age acceleration among survivors of childhood cancer. *Genome Med* **14**, 32,  
837 doi:10.1186/s13073-022-01038-6 (2022).

838 15 Vaisvila, R. *et al.* Enzymatic methyl sequencing detects DNA methylation at single-base  
839 resolution from picograms of DNA. *Genome Res* **31**, 1280-1289,  
840 doi:10.1101/gr.266551.120 (2021).

841 16 Danecek, P. *et al.* Twelve years of SAMtools and BCFtools. *Gigascience* **10**,  
842 doi:10.1093/gigascience/giab008 (2021).

843 17 MethylDackel (<https://github.com/dpryan79/MethylDackel>).

844 18 Ryan, P. *et al.* Scaling accurate genetic variant discovery to tens of thousands of  
845 samples. *bioRxiv*, 201178, doi:10.1101/201178 (2018).

846 19 Karczewski, K. J. *et al.* The mutational constraint spectrum quantified from variation in  
847 141,456 humans. *Nature* **581**, 434-443, doi:10.1038/s41586-020-2308-7 (2020).

848 20 Karczewski, K. J. *et al.* The ExAC browser: displaying reference data information from  
849 over 60 000 exomes. *Nucleic Acids Res* **45**, D840-D845, doi:10.1093/nar/gkw971  
850 (2017).

851 21 Fu, W. *et al.* Analysis of 6,515 exomes reveals the recent origin of most human protein-  
852 coding variants. *Nature* **493**, 216-220, doi:10.1038/nature11690 (2013).

853 22 Genomes Project, C. *et al.* A global reference for human genetic variation. *Nature* **526**,  
854 68-74, doi:10.1038/nature15393 (2015).

855 23 Liu, X., Jian, X. & Boerwinkle, E. dbNSFP: a lightweight database of human  
856 nonsynonymous SNPs and their functional predictions. *Hum Mutat* **32**, 894-899,  
857 doi:10.1002/humu.21517 (2011).

858 24 Landrum, M. J. *et al.* ClinVar: improving access to variant interpretations and supporting  
859 evidence. *Nucleic Acids Res* **46**, D1062-D1067, doi:10.1093/nar/gkx1153 (2018).

860 25 Li, Q. & Wang, K. InterVar: Clinical Interpretation of Genetic Variants by the 2015  
861 ACMG-AMP Guidelines. *Am J Hum Genet* **100**, 267-280, doi:10.1016/j.ajhg.2017.01.004  
862 (2017).

863 26 Wang, K., Li, M. & Hakonarson, H. ANNOVAR: functional annotation of genetic variants  
864 from high-throughput sequencing data. *Nucleic Acids Res* **38**, e164,  
865 doi:10.1093/nar/gkq603 (2010).

866 27 Jaganathan, K. *et al.* Predicting Splicing from Primary Sequence with Deep Learning.  
867 *Cell* **176**, 535-548 e524, doi:10.1016/j.cell.2018.12.015 (2019).

868 28 McLaren, W. *et al.* The Ensembl Variant Effect Predictor. *Genome Biol* **17**, 122,  
869 doi:10.1186/s13059-016-0974-4 (2016).

870 29 Ewels, P. A. *et al.* The nf-core framework for community-curated bioinformatics  
871 pipelines. *Nat Biotechnol* **38**, 276-278, doi:10.1038/s41587-020-0439-x (2020).

872 30 Giacomuzzi, E., Popitsch, N. & Taylor, J. C. GREEN-DB: a framework for the annotation  
873 and prioritization of non-coding regulatory variants from whole-genome sequencing data.  
874 *Nucleic Acids Res* **50**, 2522-2535, doi:10.1093/nar/gkac130 (2022).

875 31 Yépez, V. A., Murdock, D. R. & Lee, B. Gene expression counts from fibroblast, strand-  
876 specific, BCM UDN. *Zenodo*, doi:10.5281/zenodo.3963474 (2020).

877 32 Levy, M. A. *et al.* Functional correlation of genome-wide DNA methylation profiles in  
878 genetic neurodevelopmental disorders. *Hum Mutat* **43**, 1609-1628,  
879 doi:10.1002/humu.24446 (2022).

880 33 Levy, M. A. *et al.* Novel diagnostic DNA methylation epesignatures expand and refine the  
881 epigenetic landscapes of Mendelian disorders. *Human Genetics and Genomics  
882 Advances*, doi:10.1016/j.xhgg.2021.100075 (2021).
